# Supplementary material
Source: publisher site journal article supplement (https://www.spandidos-publications.com/1448/downloadSupplementary)
Supplement: Supplementary file 1 [file downloadSupplementary]

## Sheet: DEGs in GSE41769
Table SI. DEGs in the two datasets, GSE41769 and GSE109657, and the overlapped DEGs. DEGs, differentially expressed genes.
ID	adj.P.Val	P.Value	t	B	logFC	Gene.symbol
8063921	0.176	0.0043	3.03775	-2.16569	0.76331	MIR1-1
8120206	0.0889	0.00144	3.43769	-1.17601	0.588951	MIR206
8156022	0.00249	9.64e-06	5.10448	3.44491	0.568328	LOC642947
8156309	0.114	0.00214	3.29549	-1.53547	0.563677	GADD45G
7964246	0.216	0.00632	2.89101	-2.511	0.529832	SNORD59B
7945660	0.23	0.00708	2.84742	-2.61152	0.450582	FAM99A
8014956	0.0124	8.08e-05	4.41724	1.47242	0.449081	NR1D1
8022498	0.0728	0.00103	3.55746	-0.86741	0.435565	MIR133A1
8059708	0.374	0.0186	2.45823	-3.46402	0.432564	SNORA75
8138353	0.000311	7.19e-07	5.92937	5.85769	0.430237	MEOX2
7983527	2.28e-05	1.51e-08	7.1629	9.4352	0.420581	SEMA6D
8065607	0.0537	0.000633	3.72598	-0.42486	0.407765	PLAGL2
8047403	2.33e-05	1.61e-08	7.14147	9.37404	0.406755	CASP10
8009502	0.479	0.0331	2.21139	-3.95827	0.39675	KCNJ2
7956930	0.000192	3.74e-07	6.13617	6.46315	0.382289	DYRK2
8092169	0.184	0.00466	3.0074	-2.23796	0.380736	TNFSF10
8057713	0.317	0.0129	2.61058	-3.14039	0.375674	MSTN
7991047	0.253	0.00845	2.7785	-2.76851	0.375387	LOC100131860
8120208	0.17	0.00406	3.05972	-2.11312	0.3665	MIR133B
8086344	0.0894	0.00146	3.43184	-1.19095	0.351388	CX3CR1
8154381	0.000197	3.91e-07	6.12229	6.42254	0.343757	LURAP1L
8020806	0.148	0.00319	3.14934	-1.89636	0.338231	RNF125
8077198	0.248	0.00818	2.79121	-2.73975	0.332782	FLJ43315
8037947	0.0585	0.000717	3.68281	-0.53913	0.327134	TPRX1
8155596	0.334	0.0145	2.56218	-3.24467	0.323083	LINC00537
8137240	0.165	0.00387	3.07683	-2.07201	0.322561	GIMAP7
8137250	0.228	0.00701	2.85147	-2.60223	0.317291	GIMAP2
7971565	0.0745	0.00107	3.54436	-0.90141	0.310182	LPAR6
8113358	0.0182	0.000141	4.23317	0.95638	0.306246	ST8SIA4
7991598	0.237	0.00755	2.82232	-2.66898	0.301698	SNRPA1
8022500	0.532	0.0433	2.09043	-4.18598	0.299538	MIR1-2
7919146	0.252	0.00836	2.78245	-2.75958	0.298791	ANKRD20A12P
8120043	0.0348	0.000335	3.94365	0.15967	0.296474	RUNX2
7919139	0.188	0.00484	2.99294	-2.27224	0.296168	ANKRD20A12P
8101429	0.137	0.00281	3.19647	-1.78097	0.295327	PLAC8
8101893	0.249	0.00821	2.78989	-2.74275	0.294902	ADH1C
8059470	0.0925	0.00157	3.40597	-1.25687	0.289276	IRS1
8030823	0.45	0.0282	2.28122	-3.82239	0.288101	IGLON5
8121601	0.308	0.0119	2.64235	-3.07122	0.286407	FAM26E
8158539	0.192	0.00507	2.9759	-2.31249	0.282889	C9orf106
7947110	0.534	0.0443	2.08014	-4.2049	0.280745	E2F8
7904414	0.453	0.0287	2.27424	-3.83612	0.280061	HSD3B1
8057578	0.445	0.0275	2.29278	-3.79958	0.279555	CALCRL
8112584	0.129	0.00254	3.23307	-1.6907	0.27778	ZNF366
8094253	0.222	0.00673	2.86734	-2.56569	0.277537	CLRN2
8163107	0.416	0.0241	2.35061	-3.68425	0.275803	MIR32
8085193	0.462	0.0302	2.2517	-3.88022	0.275335	THUMPD3-AS1
7899153	0.248	0.00812	2.79406	-2.73328	0.273444	SH3BGRL3
8107769	0.0745	0.00108	3.53995	-0.91285	0.271867	SLC12A2
7900336	0.424	0.0251	2.33261	-3.72036	0.270563	MACF1
7970676	0.188	0.0049	2.98828	-2.28324	0.27005	SHISA2
8103415	0.221	0.00666	2.87118	-2.55684	0.26915	FAM198B
7923978	0.103	0.0018	3.35732	-1.38014	0.267961	CD34
8143781	0.158	0.00361	3.10302	-2.00885	0.267528	GIMAP6
7961595	0.468	0.0316	2.2318	-3.9189	0.264573	RERGL
8009873	0.487	0.0345	2.19384	-3.99193	0.264157	MYO15B
8057898	0.0659	0.000869	3.61559	-0.71582	0.263994	HECW2
7962375	0.472	0.0321	2.22464	-3.93275	0.263728	PRICKLE1
8137252	0.388	0.0201	2.42573	-3.53126	0.262949	GIMAP1
7918487	0.0212	0.000171	4.16965	0.77991	0.26263	DENND2D
8101952	0.513	0.0394	2.13344	-4.10615	0.262444	DDIT4L
8152812	0.0378	0.000393	3.88909	0.01187	0.262257	FAM84B
8053315	0.467	0.0313	2.23619	-3.91038	0.259316	LRRTM4
7955110	0.11	0.00199	3.32106	-1.47142	0.256842	DKFZP779L1853
8137244	0.203	0.00564	2.93503	-2.40848	0.256072	GIMAP4
8088292	0.199	0.00541	2.95091	-2.37129	0.254285	ASB14
8050113	0.0927	0.00159	3.40158	-1.26805	0.253585	LOC100129581
8038809	0.323	0.0134	2.59453	-3.17513	0.253317	NKG7
8056983	0.188	0.00485	2.99263	-2.27295	0.250747	LOC100130691
8059279	0.0103	6.17e-05	4.50537	1.72172	0.249166	EPHA4
7905500	0.438	0.0268	2.30353	-3.77831	0.248803	LCE2D
8151768	0.0892	0.00145	3.43404	-1.18535	0.248016	RUNX1T1
7936529	0.0488	0.000554	3.77194	-0.30259	0.247813	SHTN1
8147344	0.37	0.0181	2.47151	-3.43636	0.247085	PDP1
7909954	0.16	0.00369	3.09502	-2.02818	0.245947	DISP1
8133030	0.0369	0.000372	3.90791	0.06278	0.244716	GABPA
7951140	0.342	0.0151	2.54484	-3.2817	0.242425	LOC100131541
7970370	0.11	0.00201	3.31799	-1.47912	0.240601	UPF3A
7965226	0.27	0.00943	2.73524	-2.86579	0.24045	RASSF9
7921099	0.0389	0.000412	3.8733	-0.03074	0.239749	CRABP2
8113761	0.195	0.00518	2.96718	-2.33305	0.239159	ZNF608
7997829	0.09	0.00148	3.42736	-1.20239	0.23806	LOC100289580
7934997	0.0216	0.000175	4.16216	0.75914	0.237997	PPP1R3C
8075846	0.108	0.00192	3.3348	-1.43689	0.237396	FLJ90680
8117020	0.0628	0.000818	3.63671	-0.66046	0.236332	MYLIP
8030292	0.174	0.0042	3.04689	-2.14385	0.235103	DKKL1
8106727	0.468	0.0316	2.23249	-3.91756	0.233537	ATP6AP1L
8112615	0.345	0.0154	2.53688	-3.29863	0.231968	ENC1
8166906	0.225	0.00689	2.85811	-2.58697	0.228823	GPR34
8091402	0.355	0.0164	2.51079	-3.3539	0.22852	TM4SF18
7933842	0.00223	8.45e-06	5.14645	3.56702	0.228005	TMEM26
8078155	0.455	0.029	2.26955	-3.84531	0.22783	GALNT15
8016094	0.0889	0.00144	3.43696	-1.17789	0.227709	GJC1
8038577	0.0532	0.000623	3.73128	-0.4108	0.226988	ASPDH
7957298	0.509	0.0383	2.14646	-4.08174	0.226577	NAV3
7997135	0.26	0.00883	2.76106	-2.80784	0.226471	MTSS1L
7983143	0.328	0.0138	2.58124	-3.20377	0.225502	STARD9
8137232	0.472	0.0322	2.2242	-3.93359	0.225489	GIMAP8
7910589	0.0913	0.00153	3.41649	-1.23011	0.225374	MAP10
8020343	0.504	0.0371	2.16027	-4.05572	0.224062	ANKRD20A5P
8029784	0.198	0.00532	2.95743	-2.35599	0.223804	HIF3A
7901050	0.29	0.0106	2.6896	-2.9673	0.223692	SNORD38A
8055697	0.206	0.00579	2.92522	-2.43142	0.223107	RBM43
8091260	0.157	0.00354	3.11045	-1.99087	0.223015	SLC9A9
7965335	0.182	0.00452	3.01929	-2.20969	0.22218	DUSP6
8131631	0.412	0.0236	2.35821	-3.66893	0.222024	HDAC9
7946957	0.143	0.00305	3.16564	-1.85658	0.220469	SAAL1
8070730	0.259	0.00879	2.76285	-2.80382	0.220461	DNMT3L
8105067	0.292	0.0107	2.68368	-2.98039	0.219533	PTGER4
8135031	0.235	0.00744	2.828	-2.65602	0.218113	MUC12
8080128	0.239	0.00765	2.81723	-2.68059	0.217642	GRM2
8161476	0.41	0.023	2.36976	-3.64558	0.216989	LOC107987020
8155754	0.324	0.0135	2.59097	-3.1828	0.216345	MAMDC2
8168723	0.321	0.0132	2.60184	-3.15931	0.216155	RPA4
7992191	0.106	0.00189	3.34092	-1.42148	0.215755	TPSD1
8036389	0.312	0.0124	2.6243	-3.11059	0.215445	ZNF585B
7974363	0.413	0.0237	2.35661	-3.67215	0.215041	PTGDR
8149250	0.0925	0.00157	3.40686	-1.25463	0.214457	SGK223
8015187	0.531	0.043	2.09369	-4.17997	0.213844	KRTAP1-1
7932985	0.28	0.00992	2.7152	-2.91051	0.213085	NRP1
8092241	0.188	0.00485	2.99207	-2.27428	0.212929	KCNMB3
8067942	0.298	0.0111	2.66912	-3.01249	0.212791	MIR99A
8127193	0.376	0.0189	2.45347	-3.47391	0.211661	BMP5
8046276	0.32	0.0131	2.6033	-3.15617	0.211538	SP5
8038117	0.119	0.00227	3.27397	-1.58918	0.211269	DBP
7933733	0.355	0.0166	2.5065	-3.36295	0.210741	FAM13C
8142102	0.226	0.00693	2.8559	-2.59205	0.210529	ATXN7L1
7952313	0.3	0.0112	2.6654	-3.02068	0.209972	MIRLET7A2
8154848	0.468	0.0316	2.23276	-3.91704	0.209939	PRSS3
8134257	0.251	0.00833	2.78411	-2.75582	0.209834	GNG11
8091780	0.076	0.00112	3.52781	-0.94429	0.208351	B3GALNT1
8143448	0.141	0.00297	3.17591	-1.83143	0.207987	WEE2-AS1
8066637	0.211	0.00607	2.90683	-2.47426	0.207402	LOC643549
8054486	0.253	0.00844	2.7787	-2.76806	0.206799	NPHP1
7924499	0.139	0.00289	3.1853	-1.80843	0.205745	TLR5
8158204	0.119	0.00227	3.27384	-1.5895	0.20545	SWI5
8166730	0.45	0.0281	2.28304	-3.8188	0.205219	CYBB
8115397	0.374	0.0186	2.45989	-3.46057	0.205076	FAXDC2
8170402	0.112	0.00207	3.30794	-1.50432	0.20494	HSFX1
8175616	0.112	0.00207	3.30794	-1.50432	0.20494	HSFX1
7966839	0.19	0.00499	2.9819	-2.29833	0.204671	VSIG10
8130867	0.306	0.0117	2.64867	-3.0574	0.204132	THBS2
8124955	0.207	0.00585	2.92082	-2.44168	0.202754	NCR3
8178517	0.207	0.00585	2.92082	-2.44168	0.202754	NCR3
8179773	0.207	0.00585	2.92082	-2.44168	0.202754	NCR3
8006540	0.0855	0.00135	3.4602	-1.11842	0.202387	SNORD7
8116494	0.297	0.0111	2.67019	-3.01014	0.202055	ZFP62
8129458	0.183	0.00458	3.01408	-2.22208	0.201954	ARHGAP18
8158081	0.11	0.00201	3.31782	-1.47955	0.201716	CFAP157
8149966	0.347	0.0157	2.52865	-3.31611	0.20166	SCARA5
7900658	0.321	0.0132	2.60033	-3.16258	0.201255	TIE1
7900624	0.328	0.0139	2.58084	-3.20463	0.200769	ZNF691
8151605	0.233	0.00729	2.83605	-2.6376	0.200621	REXO1L1P
8151613	0.233	0.00729	2.83605	-2.6376	0.200621	REXO1L1P
8151617	0.233	0.00729	2.83605	-2.6376	0.200621	REXO1L1P
8151621	0.233	0.00729	2.83605	-2.6376	0.200621	REXO1L1P
8151625	0.233	0.00729	2.83605	-2.6376	0.200621	REXO1L1P
8047487	0.5	0.0365	2.16768	-4.04169	0.200374	FZD7
8098611	0.104	0.00183	3.35166	-1.39442	0.200242	TLR3
8083240	0.21	0.00602	2.91004	-2.4668	0.199864	AGTR1
8139826	0.297	0.0111	2.67145	-3.00737	0.199845	SEPHS1
8056963	0.114	0.00214	3.2958	-1.53469	0.199782	LOC100129455
7899087	0.0763	0.00114	3.52098	-0.96194	0.199613	PDIK1L
8047062	0.316	0.0127	2.61573	-3.12922	0.199354	C2orf88
8059720	0.199	0.00539	2.95219	-2.36829	0.198689	NMUR1
7940226	0.216	0.00634	2.88993	-2.51348	0.198522	MS4A2
7992954	0.226	0.00691	2.85702	-2.58948	0.198511	TRAP1
8124307	0.222	0.00668	2.86983	-2.55996	0.198419	CMAHP
7899134	0.112	0.00206	3.30878	-1.50222	0.197721	CEP85
8154124	0.332	0.0143	2.56707	-3.2342	0.19757	KCNV2
8034393	0.386	0.0199	2.43083	-3.52075	0.196924	ZNF443
8079305	0.401	0.0219	2.39135	-3.60172	0.196305	CLEC3B
8122843	0.308	0.012	2.63776	-3.08125	0.195862	ESR1
7935296	0.312	0.0124	2.62475	-3.10962	0.195254	TLL2
7992293	0.158	0.00362	3.102	-2.01132	0.195052	TMEM204
8001067	0.213	0.00618	2.90001	-2.49012	0.194765	HERC2
8092691	0.203	0.00567	2.93287	-2.41354	0.194525	BCL6
8180214	0.288	0.0104	2.69499	-2.95539	0.193953	CC2D2B
8157674	0.282	0.0101	2.70751	-2.92761	0.193197	OR1N2
7965357	0.0793	0.00122	3.49723	-1.02326	0.192971	GALNT4
8075886	0.4	0.0217	2.39436	-3.59558	0.192545	IL2RB
8003633	0.494	0.0358	2.1764	-4.02517	0.192539	BHLHA9
7971027	0.208	0.00593	2.9157	-2.45361	0.192388	ALG5
8173201	0.223	0.00677	2.86475	-2.57167	0.192165	ZXDA
7931140	0.406	0.0226	2.37683	-3.63124	0.192055	DMBT1P1
8166398	0.0548	0.00065	3.71666	-0.44958	0.191852	YY2
8047505	0.374	0.0187	2.45804	-3.46442	0.191721	KIAA2012
8122554	0.2	0.0055	2.94448	-2.38637	0.190582	RAB32
8085504	0.125	0.00242	3.25066	-1.64712	0.190405	GRIP2
8124707	0.185	0.00468	3.00595	-2.24138	0.190363	TRIM31
8027312	0.512	0.0393	2.13524	-4.10279	0.189607	ZNF429
7978391	0.31	0.0123	2.63063	-3.0968	0.189319	NOVA1
8021768	0.213	0.00614	2.90268	-2.48392	0.189285	TSHZ1
7982056	0.509	0.0382	2.14787	-4.07908	0.188354	SNORD115-25
7948316	0.21	0.00602	2.91002	-2.46685	0.188004	OR10W1
8129649	0.494	0.0357	2.1778	-4.02249	0.187818	SLC18B1
8087372	0.319	0.013	2.6063	-3.14967	0.187222	CCDC71
8084732	0.48	0.0334	2.20817	-3.96446	0.18692	RTP4
7909681	0.52	0.0409	2.11655	-4.13765	0.186304	PROX1
7993754	0.515	0.0397	2.12979	-4.11297	0.186251	ACSM2A
7955906	0.432	0.026	2.31627	-3.75299	0.186117	MIR148B
7902874	0.156	0.00351	3.11379	-1.98277	0.185697	LRRC8C
8152715	0.327	0.0138	2.58314	-3.19967	0.185692	KLHL38
7986428	0.317	0.0128	2.61172	-3.13792	0.185644	LOC400464
7980265	0.216	0.00636	2.88888	-2.51593	0.185484	ACYP1
8146645	0.0523	0.000605	3.74161	-0.38335	0.185338	BHLHE22
7911281	0.353	0.0163	2.51407	-3.34697	0.1853	OR2T35
8097867	0.192	0.00508	2.97507	-2.31445	0.185268	KIAA0922
7983145	0.295	0.0109	2.67656	-2.99612	0.185171	STARD9
8164632	0.0901	0.00149	3.42461	-1.20941	0.185135	FIBCD1
8001099	0.207	0.00583	2.92241	-2.43799	0.184858	HERC2P3
8163892	0.193	0.00512	2.97203	-2.32162	0.18452	GSN-AS1
8075024	0.345	0.0154	2.53797	-3.29632	0.184485	POM121L10P
7939835	0.305	0.0116	2.65318	-3.04752	0.183998	FAM180B
8144577	0.116	0.00219	3.28747	-1.55551	0.183823	C8orf74
7937200	0.394	0.0207	2.41403	-3.55533	0.183572	CALY
8149104	0.347	0.0157	2.5295	-3.3143	0.183482	DEFA6
8122334	0.464	0.0308	2.24353	-3.89612	0.183304	ACKR4
8161407	0.399	0.0216	2.39642	-3.59137	0.182991	FAM74A3
8148982	0.278	0.00979	2.72026	-2.89923	0.182652	LOC105377774
7960261	0.257	0.00865	2.7693	-2.78929	0.182254	RAD52
7901091	0.365	0.0176	2.48124	-3.41601	0.182086	TOE1
7949792	0.165	0.00385	3.07933	-2.06601	0.181968	PTPRCAP
8155284	0.517	0.0403	2.12406	-4.12366	0.181783	FRMPD1
8079167	0.431	0.0259	2.31875	-3.74805	0.181742	TOPAZ1
7938390	0.468	0.0317	2.2306	-3.92121	0.181697	ADM
8078380	0.308	0.0119	2.64126	-3.0736	0.181619	ZNF860
7938989	0.462	0.0303	2.2507	-3.88217	0.181523	GAS2
8084717	0.288	0.0105	2.69344	-2.95882	0.181143	ST6GAL1
8035083	0.292	0.0108	2.68313	-2.98162	0.181099	CYP4F2
8108359	0.38	0.0192	2.44519	-3.49108	0.181075	REEP2
7930380	0.262	0.00892	2.75733	-2.81623	0.180943	ADD3
8122840	0.0523	0.00061	3.73841	-0.39186	0.18068	ESR1
7923875	0.434	0.0264	2.31131	-3.76286	0.180618	C1orf186
7904073	0.239	0.00772	2.81366	-2.68874	0.180282	FAM19A3
7991750	0.347	0.0157	2.52904	-3.31529	0.180182	HBZ
8023868	0.301	0.0114	2.65966	-3.0333	0.179662	LINC00909
8127177	0.307	0.0118	2.64422	-3.06714	0.179318	KLHL31
8166571	0.133	0.00266	3.21649	-1.73168	0.179015	MAGEB6
8154953	0.0683	0.000929	3.59234	-0.7766	0.178747	PHF24
7955768	0.186	0.00475	3.00013	-2.25519	0.178621	PFDN5
8072484	0.409	0.0228	2.37301	-3.639	0.178619	LOC84843
8015396	0.207	0.00584	2.92171	-2.43961	0.178443	HAP1
7994683	0.0282	0.000249	4.04401	0.43355	0.17829	TMEM219
8087547	0.558	0.0486	2.03742	-4.28261	0.178022	MST1R
7917599	0.217	0.00643	2.88478	-2.52542	0.177852	BARHL2
7997158	0.183	0.00457	3.01455	-2.22098	0.177688	MARVELD3
8124469	0.42	0.0246	2.34073	-3.70409	0.177047	GUSBP9
7998872	0.376	0.0188	2.45526	-3.47019	0.176463	PRSS30P
8091546	0.449	0.028	2.28506	-3.81483	0.176306	TMEM14EP
7903980	0.428	0.0255	2.32587	-3.73385	0.176286	C1orf162
8063955	0.264	0.00914	2.74749	-2.83834	0.175582	OGFR
8126855	0.532	0.0436	2.08784	-4.19074	0.175562	PTCHD4
7964846	0.395	0.0211	2.40547	-3.57286	0.175523	LRRC10
8172698	0.124	0.0024	3.25354	-1.63997	0.175075	SHROOM4
8101284	0.151	0.00333	3.13333	-1.93535	0.174955	PRKG2
8145418	0.281	0.01	2.71122	-2.91935	0.174754	CDCA2
7927876	0.285	0.0102	2.70266	-2.93837	0.173661	TET1
8117741	0.24	0.00778	2.8106	-2.69569	0.173204	OR2H2
8133293	0.519	0.0406	2.12036	-4.13057	0.172687	FKBP6
8089448	0.124	0.00237	3.25747	-1.6302	0.172543	DPPA4
8171867	0.312	0.0125	2.62389	-3.11148	0.172382	ARX
8100210	0.287	0.0103	2.69923	-2.94599	0.172256	TXK
8136930	0.3	0.0113	2.66442	-3.02283	0.171951	TAS2R60
8081686	0.561	0.0498	2.02659	-4.3021	0.171875	BOC
7920027	0.503	0.037	2.16197	-4.0525	0.171672	CELF3
7946015	0.458	0.0294	2.26375	-3.85669	0.171422	OR51A4
8060103	0.271	0.00946	2.7341	-2.86833	0.171042	ANKMY1
8121563	0.306	0.0117	2.64775	-3.05941	0.17104	MARCKS
7959052	0.125	0.00241	3.25199	-1.64382	0.17089	RFC5
7937612	0.322	0.0133	2.59654	-3.17077	0.170841	MUC5B
8137257	0.413	0.0237	2.35631	-3.67276	0.170782	GIMAP5
8084219	0.309	0.0122	2.63361	-3.0903	0.170763	KLHL24
7901460	0.235	0.00746	2.82689	-2.65856	0.170603	GPX7
8111490	0.391	0.0204	2.42016	-3.54272	0.170602	PRLR
8066189	0.135	0.00272	3.20785	-1.75297	0.170329	GHRH
7991401	0.404	0.0223	2.38376	-3.61716	0.170152	HDDC3
8101874	0.514	0.0395	2.13257	-4.10777	0.170052	ADH1A
7927202	0.225	0.00682	2.86168	-2.57874	0.169903	C10orf25
7960984	0.0483	0.000543	3.7783	-0.28562	0.169867	PZP
8067944	0.558	0.0486	2.03753	-4.2824	0.169322	MIRLET7C
8091972	0.424	0.0252	2.33078	-3.72403	0.169193	MECOM
8002218	0.462	0.0303	2.25041	-3.88273	0.169189	ESRP2
8120967	0.449	0.028	2.28547	-3.81402	0.168261	NT5E
8103877	0.35	0.016	2.52173	-3.33077	0.168249	WWC2
8164833	0.399	0.0216	2.39682	-3.59056	0.168233	GBGT1
7925950	0.512	0.0392	2.13572	-4.10189	0.168229	UCN3
7927631	0.399	0.0214	2.40004	-3.58398	0.168161	DKK1
8125805	0.453	0.0288	2.27333	-3.83791	0.168066	GRM4
8054846	0.541	0.0455	2.06828	-4.2266	0.168057	SCTR
7897378	0.237	0.00758	2.82105	-2.67189	0.167899	UTS2
8079839	0.345	0.0155	2.53574	-3.30106	0.167869	FAM212A
7941444	0.371	0.0184	2.46345	-3.45316	0.167758	CTSW
7971950	0.243	0.00788	2.80561	-2.70706	0.167685	DACH1
7980352	0.374	0.0187	2.45795	-3.46459	0.16742	NGB
8069868	0.209	0.00597	2.9133	-2.4592	0.166927	KRTAP7-1
8052719	0.401	0.0218	2.3917	-3.601	0.166831	PNO1
7910142	0.51	0.0387	2.14159	-4.09088	0.16678	STUM
7925031	0.338	0.0148	2.55355	-3.26313	0.166393	LOC149373
8069450	0.265	0.00918	2.74584	-2.84203	0.166172	PRMT2
8142087	0.344	0.0152	2.5416	-3.2886	0.165693	ATXN7L1
8017927	0.535	0.0444	2.07967	-4.20576	0.164918	ABCA9
8012006	0.5	0.0364	2.16881	-4.03956	0.164816	SLC16A11
7955129	0.494	0.0357	2.17838	-4.0214	0.164813	OR8S1
7986383	0.237	0.00758	2.82112	-2.67173	0.164802	IGF1R
8138708	0.263	0.00898	2.75444	-2.82273	0.16471	HOXA1
7974117	0.361	0.0172	2.49144	-3.39463	0.164638	C14orf28
8029773	0.262	0.00894	2.75621	-2.81876	0.164615	IGFL2
8044124	0.532	0.0435	2.08847	-4.18959	0.164548	GPR45
7979505	0.528	0.0427	2.09746	-4.17302	0.164308	SIX1
7925735	0.208	0.00594	2.91531	-2.45454	0.164272	OR14A16
8038584	0.558	0.0486	2.03818	-4.28124	0.164202	LRRC4B
8150698	0.464	0.0307	2.24472	-3.89382	0.164112	SNAI2
7933707	0.505	0.0375	2.15631	-4.0632	0.163981	ZWINT
7924760	0.322	0.0133	2.5969	-3.17	0.163953	ITPKB
8002792	0.395	0.0211	2.40721	-3.5693	0.163917	FA2H
8006052	0.157	0.00352	3.11217	-1.9867	0.16386	TP53I13
8119435	0.512	0.0391	2.13706	-4.09938	0.163737	NCR2
7980142	0.317	0.0128	2.61252	-3.13618	0.163542	SYNDIG1L
8050713	0.51	0.0385	2.14457	-4.08529	0.163339	PFN4
8135705	0.339	0.0149	2.55244	-3.26548	0.163032	KCND2
8076302	0.292	0.0107	2.6854	-2.97659	0.162777	CHADL
8068024	0.436	0.0265	2.30816	-3.76911	0.162737	JAM2
7925361	0.51	0.0385	2.14368	-4.08696	0.162379	LGALS8-AS1
8061303	0.218	0.00651	2.87987	-2.53678	0.161881	INSM1
8078350	0.291	0.0106	2.68775	-2.97139	0.161772	TGFBR2
7951408	0.533	0.0442	2.08158	-4.20224	0.161522	CARD16
7900531	0.3	0.0113	2.66446	-3.02275	0.161273	GUCA2B
8033455	0.506	0.0376	2.15502	-4.06562	0.16114	PRR36
7998724	0.22	0.0066	2.87466	-2.54881	0.160866	TRAF7
8070574	0.24	0.00774	2.8126	-2.69116	0.160588	TFF2
7900699	0.446	0.0277	2.28981	-3.80546	0.160509	CDC20
7906742	0.463	0.0304	2.24868	-3.88611	0.16046	PCP4L1
8115543	0.308	0.012	2.63936	-3.07775	0.160347	EBF1
8167195	0.351	0.0161	2.51962	-3.33524	0.160287	CXXC1P1
7922550	0.389	0.0203	2.42297	-3.53695	0.160267	LOC730102
7923173	0.401	0.0219	2.39073	-3.60299	0.160055	MIR181B1
7973652	0.47	0.0318	2.22862	-3.92505	0.159977	TSSK4
8099696	0.395	0.021	2.4087	-3.56626	0.159817	SEPSECS
8094251	0.462	0.0302	2.25127	-3.88107	0.159675	TAPT1-AS1
8154132	0.518	0.0404	2.12248	-4.12661	0.159625	GLIS3
7954794	0.371	0.0183	2.46532	-3.44925	0.159609	C12orf40
7916789	0.104	0.00184	3.35025	-1.39797	0.159593	WDR78
8067969	0.554	0.0477	2.04647	-4.26625	0.159285	CHODL
8019090	0.327	0.0137	2.58403	-3.19777	0.159155	AATK
8014282	0.479	0.0333	2.20928	-3.96234	0.159061	MMP28
7925757	0.478	0.033	2.21274	-3.95567	0.159026	OR2T35
8136846	0.319	0.013	2.60686	-3.14845	0.159022	TAS2R40
8039884	0.278	0.00978	2.72059	-2.89849	0.158832	KIR2DL5B
8174543	0.361	0.0173	2.49033	-3.39696	0.158825	DCX
7999903	0.557	0.0481	2.0428	-4.27289	0.158825	KNOP1
7955943	0.169	0.00403	3.06238	-2.10674	0.158727	PDE1B
7983051	0.306	0.0118	2.64654	-3.06206	0.158723	SPTBN5
8031792	0.48	0.0334	2.20725	-3.96623	0.158692	ZNF211
7985493	0.336	0.0146	2.55857	-3.25239	0.158567	TM6SF1
8150962	0.379	0.0191	2.44759	-3.48611	0.158296	TOX
8056491	0.52	0.0409	2.11692	-4.13696	0.158296	SCN9A
8059748	0.546	0.0462	2.06164	-4.2387	0.158179	ECEL1
7923812	0.188	0.00485	2.99214	-2.27412	0.15782	RAB29
8038305	0.333	0.0144	2.56559	-3.23737	0.157603	NTF4
8067585	0.558	0.0488	2.03627	-4.28468	0.157552	BHLHE23
7978644	0.46	0.0296	2.26112	-3.86183	0.157522	NFKBIA
7982829	0.332	0.0142	2.56958	-3.22882	0.157417	SPINT1
7923792	0.527	0.0422	2.10255	-4.16362	0.157265	SLC45A3
8180093	0.313	0.0125	2.62097	-3.11783	0.157126	HLA-DOA
8157381	0.519	0.0406	2.12022	-4.13082	0.157117	ZNF618
7968236	0.359	0.0169	2.49847	-3.37987	0.156983	RASL11A
8112998	0.41	0.0231	2.367	-3.65116	0.156813	LOC645261
8159078	0.371	0.0183	2.46684	-3.44608	0.156771	CACFD1
8128991	0.395	0.0209	2.40946	-3.56469	0.156737	LAMA4
7951195	0.0763	0.00114	3.52141	-0.96085	0.156667	ANGPTL5
7950804	0.395	0.021	2.40921	-3.56521	0.156609	CCDC89
7967881	0.281	0.01	2.71186	-2.91792	0.15647	MPHOSPH8
7956038	0.412	0.0235	2.35998	-3.66535	0.156056	TMEM198B
7929689	0.436	0.0267	2.3058	-3.7738	0.155759	MARVELD1
7997907	0.468	0.0316	2.23148	-3.91951	0.155658	ANKRD11
8170322	0.468	0.0316	2.23148	-3.91951	0.155658	ANKRD11
8022559	0.525	0.0417	2.10755	-4.15435	0.155086	ANKRD29
7961891	0.361	0.0172	2.49138	-3.39475	0.155069	BHLHE41
8084589	0.493	0.0356	2.17983	-4.01864	0.154707	MAP3K13
7901948	0.479	0.0332	2.21043	-3.96012	0.154599	DLEU2L
8074714	0.461	0.03	2.25557	-3.87267	0.154589	POM121L10P
7960635	0.245	0.00797	2.80134	-2.71677	0.154497	SCARNA11
8043407	0.449	0.028	2.28513	-3.81468	0.154293	TEX37
8069511	0.464	0.0308	2.24384	-3.89553	0.154098	ANKRD20A11P
8171350	0.42	0.0247	2.33955	-3.70646	0.154078	LOC645769
8008795	0.445	0.0275	2.29264	-3.79986	0.15406	SMG8
7933298	0.531	0.0431	2.09305	-4.18114	0.153921	SYT15
7938179	0.453	0.0286	2.27614	-3.83238	0.153763	OR10A4
8114647	0.532	0.0435	2.08874	-4.1891	0.153753	SLC25A2
8115732	0.365	0.0176	2.48338	-3.41154	0.153692	LOC100133106
8025000	0.482	0.0339	2.20092	-3.97838	0.153311	VMAC
8074867	0.395	0.0208	2.4117	-3.5601	0.153153	POM121L10P
7914500	0.424	0.0251	2.33225	-3.72108	0.153095	TMEM234
8046555	0.355	0.0166	2.50593	-3.36415	0.152809	HOXD4
7956013	0.345	0.0154	2.53852	-3.29515	0.152755	BLOC1S1
8175629	0.365	0.0176	2.48202	-3.41438	0.15264	MAGEA11
7920642	0.494	0.0357	2.17815	-4.02182	0.15252	MUC1
8040774	0.165	0.00386	3.0779	-2.06943	0.151883	AGBL5
8159992	0.493	0.0356	2.17954	-4.01919	0.151834	ERMP1
7905951	0.235	0.00746	2.8272	-2.65785	0.151678	TRIM46
8065485	0.389	0.0202	2.42466	-3.53348	0.151676	NINL
8169459	0.462	0.0302	2.25206	-3.87952	0.151554	SNORA35
7904106	0.285	0.0102	2.70355	-2.93639	0.151421	MAGI3
7930208	0.345	0.0154	2.53827	-3.29568	0.151269	INA
8016994	0.359	0.0168	2.50112	-3.37428	0.150881	RNF43
7923662	0.179	0.00439	3.03019	-2.18372	0.150692	PIK3C2B
8137802	0.344	0.0153	2.53998	-3.29204	0.15066	LOC401296
7973098	0.188	0.00488	2.9902	-2.27871	0.150214	EDDM3B
7950626	0.411	0.0233	2.36463	-3.65596	0.150194	RPS20P27
8154779	0.463	0.0304	2.24942	-3.88467	0.150137	SPINK4
8170024	0.467	0.0314	2.23545	-3.91181	0.149922	SMIM10L2A
8143790	0.297	0.0111	2.67164	-3.00695	0.149746	TMEM176B
7977841	0.338	0.0148	2.55476	-3.26054	0.149348	HAUS4
8178445	0.403	0.0221	2.38622	-3.61217	0.14931	PSORS1C2
8106403	0.287	0.0104	2.69651	-2.95201	0.149263	F2RL1
7938269	0.359	0.0169	2.49871	-3.37937	0.14923	TUB
8029671	0.33	0.0141	2.57386	-3.21962	0.149095	KLC3
8060334	0.558	0.0485	2.03858	-4.28051	0.14905	SOX12
8161346	0.217	0.00639	2.88686	-2.5206	0.148788	ZNF658B
7920757	0.492	0.0352	2.18472	-4.00932	0.14837	RUSC1-AS1
7929947	0.481	0.0336	2.20449	-3.97152	0.148278	TLX1
8061247	0.263	0.00902	2.75278	-2.82646	0.1482	RIN2
7980024	0.4	0.0217	2.39406	-3.59618	0.148118	HEATR4
8013536	0.411	0.0233	2.36381	-3.65761	0.147874	NOS2
7947363	0.348	0.0158	2.52779	-3.31793	0.147598	WT1
8103894	0.36	0.0171	2.49499	-3.38718	0.147393	ENPP6
8016947	0.306	0.0117	2.64833	-3.05813	0.147145	TSPOAP1
8038213	0.216	0.00638	2.8879	-2.51819	0.147061	HSD17B14
8160417	0.41	0.0232	2.36679	-3.65159	0.146975	IFNA6
8161166	0.355	0.0165	2.50996	-3.35566	0.146849	OR2S2
8084951	0.53	0.0429	2.09527	-4.17705	0.146739	NRROS
8126337	0.246	0.00802	2.79872	-2.72271	0.146687	FRS3
7953532	0.199	0.00538	2.95261	-2.36729	0.1466	ENO2
7928408	0.0927	0.00159	3.40131	-1.26872	0.146568	ZSWIM8
8039759	0.355	0.0165	2.50839	-3.35896	0.146377	ZNF497
8175763	0.344	0.0153	2.54034	-3.29127	0.146291	PNMA5
8055941	0.424	0.0251	2.33166	-3.72228	0.146287	RPRM
8068401	0.327	0.0137	2.58408	-3.19766	0.146168	CBR1
8063526	0.505	0.0372	2.1591	-4.05792	0.146147	FAM209A
7955290	0.405	0.0224	2.38046	-3.62388	0.146004	AQP2
8097282	0.264	0.0091	2.7492	-2.8345	0.145756	SPRY1
8029541	0.41	0.023	2.36885	-3.64743	0.145743	APOC4
8006706	0.238	0.00762	2.81866	-2.67734	0.145648	C17orf78
8151542	0.361	0.0173	2.48981	-3.39804	0.145643	FABP12
8154034	0.399	0.0216	2.39732	-3.58953	0.145555	DMRT1
7915718	0.411	0.0232	2.3651	-3.65501	0.145433	TESK2
8124648	0.365	0.0176	2.48168	-3.4151	0.145197	MAS1L
8178293	0.365	0.0176	2.48168	-3.4151	0.145197	MAS1L
8179593	0.365	0.0176	2.48168	-3.4151	0.145197	MAS1L
8142100	0.453	0.0286	2.27523	-3.83417	0.145187	ATXN7L1
8029779	0.413	0.0237	2.35745	-3.67046	0.145021	IGFL1
7949364	0.476	0.0329	2.21492	-3.95149	0.144812	CDCA5
8033349	0.432	0.026	2.31684	-3.75186	0.14468	FLJ25758
7990894	0.264	0.00908	2.75023	-2.83219	0.144652	GOLGA6L3
8039530	0.198	0.00532	2.9572	-2.35653	0.144163	ZNF784
8012887	0.385	0.0197	2.4357	-3.5107	0.144124	CDRT15
8043602	0.561	0.0499	2.02518	-4.30464	0.14373	NCAPH
7986569	0.295	0.0109	2.67595	-2.99745	0.14352	HERC2P2
7985577	0.134	0.0027	3.21063	-1.74611	0.143434	ZSCAN2
7898679	0.505	0.0374	2.15703	-4.06184	0.14336	NBPF3
7920210	0.548	0.0465	2.05829	-4.2448	0.143324	SPRR2B
7960757	0.401	0.0219	2.39121	-3.60199	0.143311	C1RL
7897691	0.466	0.031	2.23986	-3.90327	0.143271	DISP3
7931097	0.331	0.0142	2.57149	-3.22471	0.143227	HTRA1
7911413	0.319	0.013	2.60617	-3.14994	0.143208	TNFRSF4
8099218	0.393	0.0206	2.41728	-3.54864	0.143199	PPP2R2C
8031516	0.493	0.0354	2.18172	-4.01505	0.143179	ZNF581
7957665	0.445	0.0275	2.29278	-3.79958	0.143169	ELK3
8052058	0.431	0.0259	2.3188	-3.74795	0.142757	LHCGR
8107576	0.309	0.0121	2.63421	-3.08899	0.142736	FTMT
7899898	0.242	0.00784	2.808	-2.70162	0.142427	HMGB4
8174761	0.245	0.00798	2.80062	-2.71841	0.142423	NKAPP1
7899192	0.458	0.0294	2.26423	-3.85575	0.142235	RPS6KA1
7921677	0.419	0.0245	2.34352	-3.69849	0.142108	CD244
7946275	0.462	0.0302	2.25226	-3.87913	0.142038	GVINP1
8036103	0.458	0.0294	2.26361	-3.85696	0.141949	SBSN
8055281	0.47	0.0319	2.22823	-3.92581	0.141667	NOC2LP2
8027385	0.458	0.0293	2.26483	-3.85456	0.141584	VSTM2B
7986248	0.457	0.0292	2.26659	-3.85113	0.141403	AGVR6190
8127180	0.46	0.0297	2.2595	-3.86499	0.141256	HMGCLL1
8042059	0.399	0.0216	2.39648	-3.59125	0.141094	PRORSD1P
8000963	0.411	0.0233	2.36465	-3.65591	0.141027	STX1B
7969222	0.322	0.0133	2.59859	-3.16634	0.140826	CCDC70
7974109	0.56	0.0495	2.02932	-4.29719	0.140786	LRFN5
8108192	0.436	0.0265	2.3081	-3.76924	0.140779	C5orf66
7996423	0.423	0.0249	2.33565	-3.71428	0.140623	FBXL8
7951695	0.306	0.0117	2.64765	-3.05963	0.140453	PLET1
8166059	0.09	0.00148	3.42788	-1.20107	0.140133	TLR7
8031522	0.431	0.0259	2.31818	-3.74919	0.139985	ZNF581
7922337	0.347	0.0157	2.52962	-3.31407	0.1399	TNFSF18
8039362	0.508	0.0381	2.14911	-4.07675	0.139843	DNAAF3
8118990	0.488	0.0346	2.19242	-3.99464	0.139669	CLPSL2
7940493	0.307	0.0119	2.6434	-3.06893	0.139638	PPP1R32
7981439	0.445	0.0274	2.2942	-3.79678	0.139602	BAG5
8130528	0.336	0.0147	2.55777	-3.25411	0.139588	RSPH3
8115730	0.46	0.0296	2.26124	-3.86159	0.139168	MIR218-2
7908204	0.528	0.0427	2.09742	-4.17308	0.139082	HMCN1
8049137	0.353	0.0162	2.51561	-3.34371	0.138992	ALPI
8100893	0.475	0.0327	2.21654	-3.94836	0.138869	COX18
7962579	0.386	0.0199	2.43082	-3.52079	0.138758	AMIGO2
7998485	0.508	0.038	2.15018	-4.07473	0.138751	C16orf91
8040843	0.137	0.00283	3.19276	-1.79011	0.138714	CAD
8045146	0.512	0.0393	2.13511	-4.10302	0.138597	MZT2B
8109651	0.148	0.00318	3.14979	-1.89528	0.138533	GABRA6
8078312	0.532	0.0435	2.08869	-4.18918	0.138503	CMC1
8080868	0.466	0.031	2.2405	-3.90203	0.138501	C3orf49
8007363	0.529	0.0428	2.09625	-4.17526	0.138418	WNK4
8156196	0.461	0.0298	2.25772	-3.86848	0.138399	C9orf170
7904244	0.319	0.013	2.60572	-3.15093	0.138367	MAB21L3
8041487	0.558	0.0483	2.04047	-4.27709	0.13802	GPATCH11
8157362	0.406	0.0225	2.37834	-3.62818	0.137925	ZNF618
8125798	0.558	0.0485	2.03846	-4.28073	0.13789	MLN
8174207	0.424	0.025	2.33376	-3.71806	0.137765	NXF3
7974341	0.528	0.0426	2.09793	-4.17215	0.137761	GNG2
8161319	0.292	0.0108	2.6828	-2.98234	0.137664	ZNF658B
8027402	0.512	0.039	2.13818	-4.09728	0.137579	CCNE1
7997346	0.239	0.00769	2.81526	-2.68508	0.137322	CLEC3A
7919923	0.533	0.0441	2.08276	-4.20007	0.137283	LYSMD1
8112596	0.503	0.037	2.1618	-4.05283	0.137239	ANKRA2
7915345	0.416	0.0241	2.34999	-3.68549	0.137216	NFYC-AS1
7955156	0.388	0.0201	2.42575	-3.53122	0.137035	CCDC65
7914880	0.558	0.0489	2.03495	-4.28705	0.137001	COL8A2
7960709	0.452	0.0285	2.27703	-3.83062	0.136993	SPSB2
8118498	0.546	0.0461	2.06166	-4.23866	0.136963	CYP21A1P
7911229	0.381	0.0194	2.4415	-3.49871	0.13695	OR2W3
7911231	0.381	0.0194	2.4415	-3.49871	0.13695	OR2W3
7943919	0.557	0.048	2.0432	-4.27217	0.136534	TTC12
7985352	0.369	0.018	2.4736	-3.43198	0.136397	CFAP161
7948221	0.511	0.0389	2.13939	-4.09501	0.136099	PRG2
8015503	0.394	0.0208	2.41314	-3.55715	0.136057	ZNF385C
7954645	0.52	0.0409	2.11733	-4.1362	0.136009	TSPAN11
8104107	0.479	0.0333	2.20932	-3.96226	0.13558	TRIML2
8092514	0.52	0.0409	2.11683	-4.13714	0.135338	MAGEF1
8076094	0.361	0.0172	2.49147	-3.39457	0.135292	DMC1
8067270	0.333	0.0144	2.5658	-3.23691	0.135142	APCDD1L
7922040	0.467	0.0314	2.23514	-3.91242	0.135018	CD247
7955358	0.508	0.0382	2.14814	-4.07858	0.134527	COX14
8140454	0.267	0.00929	2.74109	-2.85268	0.134324	SPDYE7P
7908692	0.508	0.038	2.1496	-4.07583	0.134004	RPS10P7
7927305	0.532	0.0434	2.08987	-4.18701	0.133934	AGAP5
8006119	0.512	0.0391	2.13704	-4.09941	0.133932	MIR3184
7982154	0.24	0.00777	2.81119	-2.69437	0.133864	HERC2P9
8054054	0.521	0.0412	2.11391	-4.14255	0.133836	ANKRD36
7929168	0.379	0.0191	2.44723	-3.48685	0.133716	TNKS2
8161326	0.339	0.0149	2.55118	-3.26817	0.133716	ZNF658B
8000590	0.406	0.0226	2.37798	-3.62891	0.133319	SULT1A1
8111677	0.237	0.00756	2.8222	-2.66926	0.133124	LIFR
8058552	0.463	0.0305	2.24781	-3.88781	0.13288	IDH1
8090630	0.222	0.00669	2.8694	-2.56096	0.132826	TMCC1
8040632	0.533	0.0442	2.0815	-4.20239	0.132649	GAREM2
8171624	0.369	0.018	2.47223	-3.43484	0.132436	ADGRG2
7899905	0.494	0.0359	2.17574	-4.02641	0.132424	HMGB4
7961300	0.56	0.0496	2.02875	-4.29822	0.132275	PRB3
8155734	0.523	0.0415	2.11072	-4.14849	0.13219	FAM189A2
8004948	0.452	0.0285	2.2774	-3.8299	0.132127	SHISA6
8014702	0.532	0.0433	2.09127	-4.18443	0.132115	LOC100129395
7908816	0.462	0.0303	2.25067	-3.88224	0.132029	LGR6
8082607	0.532	0.0435	2.08901	-4.18859	0.131942	ATP2C1
7963203	0.553	0.0473	2.05005	-4.25977	0.131894	FAM186A
8066612	0.359	0.017	2.49768	-3.38152	0.131892	NEURL2
8124695	0.332	0.0143	2.56708	-3.23418	0.131844	RNF39
8178326	0.332	0.0143	2.56708	-3.23418	0.131844	RNF39
7984743	0.464	0.0305	2.24731	-3.88877	0.131823	CD276
8152252	0.412	0.0236	2.35947	-3.66639	0.131564	BAALC-AS2
7936996	0.36	0.0172	2.49298	-3.3914	0.131561	C10orf90
7981525	0.411	0.0233	2.36342	-3.65839	0.131523	CDCA4
7897132	0.474	0.0324	2.22053	-3.94068	0.13118	PRDM16
8078272	0.505	0.0372	2.1596	-4.05698	0.131151	NR1D2
7958761	0.558	0.0488	2.03615	-4.2849	0.131068	ACAD10
7925741	0.412	0.0235	2.36028	-3.66475	0.131002	OR2T33
8059878	0.192	0.00506	2.97635	-2.31142	0.130891	IQCA1
8021222	0.541	0.0453	2.06974	-4.22392	0.130832	ELAC1
8137906	0.453	0.0286	2.27538	-3.83387	0.130568	RADIL
8180195	0.423	0.0249	2.33578	-3.71402	0.130437	CFHR1
8163019	0.52	0.041	2.11625	-4.1382	0.130433	ACTL7B
7955613	0.521	0.0411	2.11483	-4.14085	0.130361	KRT7
8083129	0.503	0.037	2.16226	-4.05196	0.130359	GRK7
8159566	0.412	0.0236	2.35865	-3.66803	0.130313	MAN1B1
8004802	0.311	0.0123	2.62873	-3.10094	0.130055	BORCS6
8099172	0.551	0.0471	2.05244	-4.25542	0.129772	CRMP1
8042416	0.55	0.0469	2.05407	-4.25247	0.129712	ARHGAP25
8177706	0.461	0.0299	2.25617	-3.8715	0.129625	OR2H2
8179009	0.461	0.0299	2.25617	-3.8715	0.129625	OR2H2
7946972	0.175	0.00423	3.04432	-2.14998	0.129539	SAA3P
7933537	0.517	0.0402	2.12478	-4.12233	0.129373	OGDHL
8114536	0.525	0.0418	2.10709	-4.1552	0.129171	TMEM173
8036707	0.346	0.0156	2.53286	-3.30719	0.128952	LRFN1
8086981	0.434	0.0264	2.31073	-3.764	0.128768	UCN2
7923043	0.482	0.0339	2.20112	-3.97799	0.128587	KCNT2
8030768	0.558	0.0485	2.03882	-4.28009	0.128526	KLK2
8122860	0.474	0.0325	2.21918	-3.94328	0.128472	MYCT1
7966668	0.517	0.0401	2.12556	-4.12087	0.128365	TBX5
8067094	0.51	0.0388	2.14096	-4.09207	0.12815	ZFP64
8134827	0.436	0.0265	2.30887	-3.76771	0.128134	NYAP1
8141052	0.45	0.0281	2.28325	-3.8184	0.128068	PON1
8060963	0.502	0.0368	2.16477	-4.04721	0.128018	SNAP25
7910217	0.401	0.0219	2.39139	-3.60163	0.127969	WNT3A
7925743	0.482	0.0338	2.20287	-3.97464	0.127897	OR2T33
7955721	0.474	0.0325	2.22032	-3.94108	0.12765	ZNF740
8033818	0.558	0.049	2.03368	-4.28936	0.127445	OLFM2
7913271	0.48	0.0335	2.20643	-3.96781	0.127411	KIF17
7998886	0.386	0.0198	2.43222	-3.51789	0.127247	PKMYT1
7931930	0.487	0.0344	2.19447	-3.99072	0.127127	PRKCQ
8147516	0.558	0.0483	2.04075	-4.2766	0.126851	MATN2
7998466	0.184	0.00465	3.00814	-2.23619	0.1268	UNKL
7962703	0.553	0.0473	2.05025	-4.2594	0.126743	COL2A1
8097657	0.415	0.0239	2.3537	-3.67802	0.126599	SMAD1
8006085	0.409	0.0229	2.37086	-3.64336	0.126585	EFCAB5
7940189	0.395	0.0211	2.4062	-3.57138	0.12653	OR4D9
8048505	0.488	0.0346	2.19189	-3.99564	0.126513	STK16
8066530	0.179	0.00437	3.03179	-2.17992	0.126494	SPINT3
7972570	0.39	0.0203	2.42183	-3.53929	0.126487	GGACT
8069985	0.509	0.0383	2.14673	-4.08124	0.126063	SNORA80A
7948046	0.355	0.0166	2.50678	-3.36236	0.126017	OR4C13
8061647	0.445	0.0275	2.2933	-3.79855	0.125652	XKR7
8072353	0.528	0.0426	2.09795	-4.1721	0.125102	LOC646513
8098697	0.489	0.0348	2.18908	-4.00102	0.125075	TRIML1
8062123	0.467	0.0314	2.23465	-3.91337	0.125066	MMP24
8175263	0.499	0.0363	2.16996	-4.03738	0.124872	PLAC1
7905523	0.473	0.0323	2.22284	-3.93622	0.124871	LCE1D
7901969	0.484	0.0341	2.19883	-3.98238	0.124812	ROR1
8156321	0.522	0.0412	2.11296	-4.14432	0.124786	SYK
7934114	0.415	0.0239	2.35319	-3.67905	0.124773	TYSND1
7925480	0.201	0.00553	2.94265	-2.39065	0.124702	FH
8166157	0.462	0.03	2.25426	-3.87523	0.124189	BMX
7993054	0.533	0.0439	2.08438	-4.1971	0.123922	SEC14L5
8161026	0.51	0.0385	2.1444	-4.08561	0.123677	CCDC107
7911258	0.557	0.0482	2.04167	-4.27492	0.123631	OR2L3
8146403	0.238	0.00764	2.81795	-2.67896	0.123603	SNTG1
8173862	0.56	0.0497	2.02754	-4.3004	0.123378	SATL1
8071953	0.558	0.0491	2.03335	-4.28994	0.12336	SGSM1
7919326	0.558	0.0489	2.03498	-4.28701	0.123335	ACP6
8146480	0.465	0.0308	2.24301	-3.89714	0.123229	TMEM68
8098740	0.403	0.0222	2.38455	-3.61556	0.123208	DUX3
8063043	0.31	0.0123	2.63028	-3.09756	0.123093	UBE2C
8112306	0.561	0.0499	2.02543	-4.30419	0.123062	LOC57399
8031847	0.464	0.0307	2.24541	-3.89247	0.122647	ZSCAN1
7963064	0.533	0.0441	2.08224	-4.20103	0.122525	MCRS1
8149438	0.359	0.0168	2.50042	-3.37575	0.122523	SGCZ
8079433	0.533	0.0441	2.08282	-4.19996	0.122432	PTH1R
7981084	0.512	0.0393	2.13522	-4.10282	0.122222	SERPINA9
8120210	0.504	0.0371	2.16116	-4.05404	0.122121	IL17A
8056184	0.325	0.0136	2.5895	-3.18596	0.122044	ITGB6
8025551	0.528	0.0426	2.09849	-4.17111	0.121836	ANGPTL6
7986701	0.336	0.0146	2.5582	-3.25319	0.121752	HERC2P9
7986503	0.494	0.0358	2.17696	-4.02409	0.121547	DNM1P46
7916493	0.239	0.00773	2.81353	-2.68903	0.121541	PLPP3
7897257	0.51	0.0388	2.14082	-4.09233	0.12151	RNF207
7999364	0.533	0.0442	2.08163	-4.20215	0.121413	GRIN2A
8081214	0.509	0.0383	2.14698	-4.08077	0.121289	GPR15
8013833	0.487	0.0344	2.19407	-3.99148	0.121157	SEZ6
7912361	0.281	0.00998	2.71256	-2.91638	0.121109	MASP2
7980690	0.416	0.024	2.35106	-3.68334	0.121048	EFCAB11
8052828	0.532	0.0435	2.08898	-4.18865	0.121007	ASPRV1
8037123	0.438	0.0268	2.30356	-3.77825	0.120894	POU2F2
8016371	0.409	0.0229	2.37069	-3.6437	0.120884	SCRN2
7958960	0.263	0.009	2.75348	-2.8249	0.120718	TPCN1
8064739	0.513	0.0395	2.13305	-4.10688	0.120451	C20orf27
8170507	0.52	0.0409	2.11693	-4.13695	0.120307	PRRG3
7957433	0.472	0.0322	2.22413	-3.93372	0.120033	LRRIQ1
7973135	0.528	0.0424	2.1006	-4.16722	0.119972	SLC39A2
8021594	0.286	0.0103	2.70047	-2.94323	0.119964	SERPINB12
8066444	0.554	0.0476	2.04775	-4.26394	0.119937	LINC01260
8031622	0.56	0.0494	2.02984	-4.29626	0.119607	GALP
7947096	0.419	0.0244	2.34427	-3.69698	0.119599	MRGPRX2
7994647	0.422	0.0248	2.33713	-3.71131	0.11958	PRRT2
8178330	0.532	0.0436	2.08789	-4.19064	0.119487	TRIM31
8132531	0.399	0.0216	2.39578	-3.59268	0.119432	SPDYE2
8077299	0.42	0.0246	2.34065	-3.70426	0.119285	CNTN6
8117178	0.461	0.03	2.25561	-3.87259	0.119236	NRSN1
8084541	0.45	0.0282	2.28176	-3.82133	0.119141	VPS8
7962226	0.354	0.0164	2.51181	-3.35175	0.119075	SYT10
7940046	0.557	0.0481	2.04262	-4.27321	0.118884	CLP1
8088491	0.499	0.0364	2.16955	-4.03816	0.118572	CADPS
8133309	0.494	0.0357	2.17851	-4.02115	0.118464	PMS2P9
7934451	0.292	0.0107	2.68633	-2.97455	0.118307	AGAP5
7899643	0.514	0.0396	2.13177	-4.10928	0.118143	HCRTR1
8141664	0.554	0.0475	2.04874	-4.26213	0.117811	VGF
8016452	0.508	0.038	2.14985	-4.07535	0.117744	HOXB4
8079274	0.527	0.0423	2.10143	-4.16569	0.117708	MIR564
8133582	0.376	0.0188	2.45516	-3.47039	0.117662	SPDYE6
8076007	0.505	0.0373	2.15819	-4.05964	0.117328	BAIAP2L2
8121277	0.461	0.0299	2.25608	-3.87167	0.117131	AIM1
7973510	0.468	0.0316	2.23238	-3.91777	0.116996	CPNE6
7924842	0.528	0.0425	2.09967	-4.16893	0.116969	C1orf35
7984759	0.462	0.0301	2.25297	-3.87774	0.11682	TBC1D21
8140424	0.449	0.0279	2.2861	-3.81277	0.116751	SPDYE7P
8008819	0.369	0.0179	2.47468	-3.42973	0.116607	YPEL2
8168646	0.404	0.0223	2.38289	-3.61893	0.116479	TGIF2LY
8159981	0.523	0.0415	2.11039	-4.1491	0.116479	RLN1
7994541	0.558	0.0491	2.03263	-4.29125	0.116376	LAT
7953835	0.479	0.0331	2.21126	-3.95854	0.116076	KLRG1
8065911	0.493	0.0355	2.18047	-4.01741	0.115829	C20orf173
8046116	0.454	0.0289	2.27117	-3.84215	0.115674	G6PC2
7929858	0.474	0.0325	2.22015	-3.9414	0.11553	SLF2
8005894	0.461	0.0299	2.25632	-3.87122	0.115163	FOXN1
8102368	0.369	0.018	2.47364	-3.4319	0.115098	NEUROG2
8045368	0.489	0.0348	2.18938	-4.00044	0.115024	ACMSD
8134737	0.474	0.0324	2.22098	-3.93981	0.114906	MBLAC1
8155376	0.509	0.0383	2.14667	-4.08134	0.114447	FAM74A3
7983447	0.559	0.0492	2.03183	-4.29267	0.114306	SLC28A2
7986642	0.404	0.0223	2.38231	-3.62012	0.114213	GOLGA8DP
8117288	0.512	0.0391	2.13735	-4.09883	0.114047	SCGN
8105340	0.428	0.0256	2.32436	-3.73685	0.113988	GZMA
8092541	0.461	0.0299	2.25568	-3.87246	0.113954	LIPH
8032770	0.513	0.0394	2.13338	-4.10626	0.113943	SIRT6
7937774	0.344	0.0153	2.54079	-3.29032	0.113803	IGF2-AS
8155824	0.278	0.00978	2.72059	-2.8985	0.113642	TMC1
8137219	0.436	0.0265	2.30892	-3.7676	0.113405	ZBED6CL
8051777	0.526	0.0421	2.10379	-4.16132	0.113262	COX7A2L
7924465	0.482	0.0338	2.20187	-3.97656	0.113204	HHIPL2
8031617	0.479	0.0331	2.21109	-3.95885	0.113107	ZNF444
8009493	0.436	0.0266	2.30674	-3.77195	0.112963	KCNJ16
8004201	0.387	0.02	2.4286	-3.52535	0.11287	ALOX12P2
8125545	0.324	0.0135	2.59098	-3.18277	0.112799	HLA-DOA
7996313	0.506	0.0376	2.15474	-4.06614	0.112098	CMTM2
8180370	0.52	0.041	2.11612	-4.13846	0.112054	FAM207A
7900597	0.445	0.0275	2.29247	-3.8002	0.112037	C1orf50
7933121	0.388	0.02	2.42789	-3.52682	0.111631	CCNYL2
8070757	0.532	0.0432	2.0924	-4.18236	0.111484	TSPEAR
7948951	0.448	0.0278	2.2875	-3.81001	0.111315	SLC22A24
7970727	0.505	0.0374	2.15757	-4.06081	0.11021	CDX2
8168940	0.385	0.0197	2.43493	-3.5123	0.109257	NXF4
8104122	0.503	0.037	2.16206	-4.05234	0.108873	DUX5
7991695	0.488	0.0346	2.19151	-3.99639	0.108857	GOLGA8DP
8133571	0.351	0.0161	2.51945	-3.33561	0.108822	SPDYE8P
8075118	0.555	0.0478	2.04563	-4.26777	0.108767	CRYBB1
7973363	0.493	0.0355	2.17997	-4.01837	0.108491	REM2
7944603	0.528	0.0425	2.09987	-4.16857	0.108323	GRIK4
8162562	0.424	0.0251	2.33188	-3.72183	0.108079	LINC00476
7918794	0.435	0.0264	2.31019	-3.76509	0.107992	AMPD1
7898431	0.41	0.0232	2.36682	-3.65153	0.107821	PADI3
8168678	0.445	0.0274	2.29475	-3.7957	0.10764	FAM133A
8167198	0.533	0.0442	2.08164	-4.20214	0.107231	WASF2
8166745	0.414	0.0238	2.3544	-3.6766	0.106975	HYPM
8065124	0.554	0.0474	2.04889	-4.26187	0.106799	BFSP1
8075569	0.468	0.0317	2.23121	-3.92003	0.106591	SLC5A4
8104499	0.528	0.0424	2.10026	-4.16785	0.106562	ANKRD33B
7964787	0.528	0.0427	2.09766	-4.17266	0.106294	IFNG
8128079	0.525	0.042	2.1048	-4.15945	0.106176	SRSF12
7982131	0.377	0.0189	2.45188	-3.47721	0.106032	GOLGA8DP
7986922	0.377	0.0189	2.45188	-3.47721	0.106032	GOLGA8DP
8157105	0.558	0.049	2.03395	-4.28886	0.105938	ZNF462
7959212	0.37	0.0181	2.47133	-3.43672	0.105725	UNC119B
7971400	0.501	0.0366	2.16731	-4.04241	0.105317	ERICH6B
7916384	0.558	0.0491	2.03313	-4.29034	0.105006	CDCP2
8061154	0.492	0.0354	2.18232	-4.0139	0.104922	ZNF133
7981752	0.395	0.0211	2.40612	-3.57154	0.104897	GOLGA8DP
8095663	0.406	0.0226	2.37663	-3.63165	0.104809	AFM
8174304	0.542	0.0456	2.06696	-4.229	0.104715	SERPINA7
7907260	0.561	0.0498	2.0269	-4.30155	0.104072	FMO6P
7996593	0.355	0.0165	2.50819	-3.3594	0.104005	CTCF
7982757	0.467	0.0313	2.2358	-3.91114	0.103815	KNL1
8022763	0.556	0.0479	2.04444	-4.26992	0.103625	SLC25A52
8157308	0.558	0.0491	2.0329	-4.29076	0.103566	C9orf43
7946326	0.547	0.0464	2.05923	-4.24308	0.103532	OR5P3
7986329	0.561	0.0499	2.02562	-4.30385	0.103443	NR2F2
8126531	0.556	0.0478	2.04497	-4.26896	0.103267	CRIP3
7933405	0.456	0.0291	2.2675	-3.84933	0.102966	AGAP12P
7905589	0.406	0.0225	2.37893	-3.62699	0.102385	CHTOP
8083814	0.508	0.0381	2.14928	-4.07643	0.102257	SAMD7
8093413	0.499	0.0364	2.16965	-4.03797	0.102025	TMEM175
7991668	0.505	0.0375	2.15584	-4.06408	0.101748	GOLGA8DP
8035737	0.428	0.0256	2.32389	-3.73779	0.101678	ATP13A1
8053944	0.474	0.0326	2.21862	-3.94435	0.101609	NEURL3
8108633	0.411	0.0233	2.36484	-3.65552	0.101373	PCDHA1
7951178	0.52	0.0408	2.11787	-4.1352	0.100806	TRPC6
8100507	0.56	0.0495	2.02917	-4.29746	0.100595	HOPX
8154721	0.467	0.0313	2.23582	-3.91111	0.10054	IFNK
8024497	0.403	0.0221	2.38679	-3.611	0.100165	THOP1
7993310	0.528	0.0424	2.10087	-4.16672	0.100032	MKL2
8019857	0.513	0.0395	2.13307	-4.10684	0.0995833	NDC80
8086352	0.539	0.045	2.07326	-4.21748	0.099503	ULK4
8032224	0.525	0.042	2.10465	-4.15973	0.0994193	C19orf25
7933427	0.487	0.0345	2.19361	-3.99237	0.098531	AGAP5
8081925	0.533	0.0441	2.08289	-4.19985	0.0982517	NR1I2
8140211	0.54	0.0451	2.07185	-4.22007	0.0970839	SPDYE8P
8035958	0.373	0.0185	2.46151	-3.45718	0.0956077	CEP89
8100127	0.533	0.0438	2.08567	-4.19473	0.0954029	COX7B2
8133590	0.511	0.0389	2.13907	-4.09561	0.0951365	SPDYE6
8153776	0.546	0.0462	2.06096	-4.23994	0.0948009	VPS28
7995976	0.512	0.039	2.13805	-4.09752	0.0944611	CPNE2
8159790	0.449	0.028	2.28533	-3.8143	0.0944454	LOC100288778
7933574	0.508	0.0381	2.14876	-4.07741	0.0941325	AGAP5
8149500	0.468	0.0316	2.23186	-3.91877	0.093882	MTUS1
8113234	0.468	0.0315	2.23287	-3.91681	0.0930687	PCSK1
7986541	0.364	0.0174	2.48611	-3.40582	0.0922726	LOC100288778
8044094	0.561	0.0497	2.02697	-4.30142	0.0917747	TMEM182
7911701	0.522	0.0413	2.11228	-4.14559	0.091481	MORN1
7927353	0.539	0.0451	2.07247	-4.21893	0.091474	AGAP5
7933331	0.539	0.0451	2.07247	-4.21893	0.091474	AGAP5
8133600	0.51	0.0386	2.1425	-4.08917	0.0907278	SPDYE6
8140009	0.51	0.0386	2.1425	-4.08917	0.0907278	SPDYE8P
8072304	0.533	0.0441	2.0823	-4.20093	0.0882594	HORMAD2
7933252	0.56	0.0496	2.0282	-4.29921	0.0874868	AGAP5
8139003	0.533	0.0442	2.08179	-4.20187	0.0864145	HERPUD2
8044649	0.411	0.0234	2.36186	-3.66155	0.0862065	LOC100288778
7982206	0.51	0.0385	2.14378	-4.08677	0.0852386	GOLGA8O
8081192	0.548	0.0465	2.05769	-4.24588	0.0830029	OR5AC2
7965467	0.55	0.0469	2.05434	-4.25198	0.0827123	RPL41
7982129	0.55	0.0469	2.05434	-4.25198	0.0827123	RPL41
7927552	0.558	0.0487	2.03643	-4.28439	0.0824118	AGAP5
7930760	0.558	0.0488	2.0363	-4.28462	0.0818553	PNLIPRP3
7911309	0.374	0.0186	2.46009	-3.46015	0.0807965	LOC100288778
7972247	0.525	0.0419	2.10637	-4.15654	0.0805754	SP3P
8120937	0.533	0.0437	2.08655	-4.19311	0.0804885	RIPPLY2
8015802	0.382	0.0195	2.43991	-3.502	0.0803435	LINC00910
8096682	0.547	0.0464	2.05965	-4.24233	0.0754275	ARHGEF38
7928982	0.541	0.0454	-2.06936	-4.22462	-0.0723683	LIPF
8161056	0.451	0.0283	-2.28007	-3.82466	-0.0756271	TLN1
8054297	0.532	0.0433	-2.09137	-4.18425	-0.0778923	CHST10
8080320	0.491	0.0351	-2.18584	-4.0072	-0.0828778	NISCH
8068974	0.359	0.0169	-2.49922	-3.37828	-0.0859877	TRAPPC10
7941769	0.519	0.0405	-2.12076	-4.12982	-0.0868289	KDM2A
8137054	0.538	0.0448	-2.07489	-4.2145	-0.0894686	CUL1
8070988	0.463	0.0304	-2.24861	-3.88624	-0.0903701	MCM3AP
8154892	0.434	0.0263	-2.31198	-3.76152	-0.0910409	DNAI1
7915827	0.511	0.0389	-2.13924	-4.09528	-0.091345	LRRC41
8161988	0.537	0.0447	-2.07589	-4.21268	-0.0918537	UBQLN1
8048340	0.557	0.0482	-2.04201	-4.27432	-0.0927105	CNOT9
8112920	0.401	0.0219	-2.39084	-3.60275	-0.0932097	ACOT12
8117071	0.545	0.046	-2.06361	-4.23511	-0.0935555	FAM8A1
7986969	0.395	0.0209	-2.40955	-3.56452	-0.093669	NSMCE3
7977127	0.436	0.0267	-2.3063	-3.77281	-0.0937025	KLC1
8032410	0.489	0.0348	-2.18951	-4.0002	-0.094084	MOB3A
7945902	0.443	0.0272	-2.29704	-3.79116	-0.0940895	NUP98
8041138	0.445	0.0275	-2.29224	-3.80065	-0.094228	SPDYA
7927786	0.525	0.0417	-2.108	-4.15352	-0.0947393	REEP3
8063394	0.368	0.0178	-2.47693	-3.42502	-0.0951342	PTPN1
7927389	0.508	0.0379	-2.15174	-4.0718	-0.0952836	MAPK8
8167042	0.359	0.0168	-2.50108	-3.37437	-0.095922	RBM10
8073345	0.505	0.0374	-2.15673	-4.06239	-0.0960845	EP300
8000425	0.33	0.014	-2.5766	-3.21374	-0.0963141	GTF3C1
8108378	0.404	0.0223	-2.38288	-3.61895	-0.0976555	CTNNA1
8100902	0.446	0.0276	-2.29077	-3.80357	-0.0976842	ANKRD17
8003089	0.547	0.0464	-2.05925	-4.24305	-0.0983283	MBTPS1
8055151	0.42	0.0245	-2.34306	-3.69941	-0.09878	POTEF
7934812	0.376	0.0188	-2.45452	-3.47173	-0.0988298	WAPL
7905700	0.451	0.0284	-2.27938	-3.82601	-0.0989466	UBAP2L
7924969	0.556	0.048	-2.0439	-4.27091	-0.0991294	TAF5L
8099340	0.561	0.0499	-2.02577	-4.30358	-0.0991322	WDR1
7982957	0.558	0.0488	-2.03549	-4.28609	-0.0996761	MGA
8010848	0.281	0.01	-2.71136	-2.91903	-0.100436	TBCD
7994371	0.487	0.0345	-2.19347	-3.99264	-0.100575	NPIPB9
8131452	0.513	0.0393	-2.13447	-4.10422	-0.100605	RSPH10B2
8126653	0.518	0.0405	-2.12182	-4.12784	-0.100735	MRPL14
8027938	0.462	0.0302	-2.25173	-3.88016	-0.100787	UPK1A
7995479	0.558	0.0491	-2.03284	-4.29087	-0.101178	PAPD5
7970655	0.406	0.0226	-2.37746	-3.62996	-0.101185	MTMR6
7918593	0.464	0.0306	-2.24609	-3.89116	-0.101425	RHOC
8097480	0.507	0.0378	-2.15269	-4.07002	-0.102041	NAA15
8076056	0.331	0.0142	-2.5721	-3.2234	-0.102135	LOC400927
8086706	0.517	0.04	-2.12667	-4.1188	-0.102321	SETD2
8123315	0.424	0.0251	-2.33301	-3.71957	-0.102428	QKI
8101002	0.434	0.0263	-2.31191	-3.76166	-0.102546	BTC
7983828	0.489	0.0348	-2.19	-3.99927	-0.102757	TEX9
8169115	0.552	0.0473	-2.0506	-4.25877	-0.102852	NRK
8072962	0.515	0.0397	-2.13059	-4.11149	-0.103391	MICALL1
8144184	0.308	0.012	-2.63794	-3.08086	-0.103654	ESYT2
8047518	0.533	0.0441	-2.08267	-4.20025	-0.10369	NOP58
8125360	0.557	0.0482	-2.04193	-4.27446	-0.103956	PBX2
8002333	0.557	0.0482	-2.04121	-4.27575	-0.104448	SMG1P7
8000156	0.559	0.0493	-2.03123	-4.29376	-0.104462	SMG1P3
7979204	0.541	0.0454	-2.06914	-4.22502	-0.104794	FERMT2
8127977	0.517	0.0401	-2.12555	-4.1209	-0.104969	SYNCRIP
8127549	0.558	0.0487	-2.03708	-4.28322	-0.105413	SLC17A5
8022320	0.505	0.0372	-2.15898	-4.05816	-0.105617	PDXDC2P
8011480	0.498	0.0362	-2.17145	-4.03455	-0.106012	CAMKK1
8082165	0.394	0.0207	-2.41436	-3.55464	-0.10611	KALRN
8037816	0.42	0.0247	-2.339	-3.70757	-0.106157	STRN4
8151549	0.548	0.0466	-2.05741	-4.24639	-0.10633	IMPA1
8038515	0.355	0.0166	-2.50698	-3.36193	-0.106381	VRK3
8078110	0.446	0.0277	-2.29012	-3.80485	-0.106506	CAPN7
7993159	0.533	0.0442	-2.08196	-4.20156	-0.10662	C16orf72
8019463	0.474	0.0326	-2.21853	-3.94453	-0.106839	CSNK1D
8104944	0.403	0.0221	-2.38619	-3.61222	-0.106879	NIPBL
8175998	0.401	0.0218	-2.39279	-3.59877	-0.107086	MECP2
8134091	0.502	0.0368	-2.16459	-4.04756	-0.107769	CLDN12
8155148	0.483	0.034	-2.20014	-3.97987	-0.107937	TMEM8B
7978846	0.506	0.0376	-2.15452	-4.06656	-0.108014	POLE2
8152079	0.528	0.0427	-2.09707	-4.17374	-0.108018	PABPC1
7929719	0.502	0.0367	-2.16594	-4.04499	-0.108584	R3HCC1L
7901883	0.217	0.00646	-2.88308	-2.52934	-0.108597	ANGPTL3
7934513	0.519	0.0407	-2.11924	-4.13265	-0.108834	AP3M1
8061919	0.46	0.0296	-2.26006	-3.8639	-0.109045	CBFA2T2
8162449	0.547	0.0464	-2.05963	-4.24236	-0.109646	ZNF484
7904812	0.49	0.0349	-2.18839	-4.00233	-0.10985	PIAS3
8143879	0.56	0.0497	-2.02761	-4.30027	-0.109936	TMUB1
8069910	0.45	0.0281	-2.28387	-3.81717	-0.110002	SCAF4
8145027	0.488	0.0346	-2.19243	-3.99461	-0.11005	FAM160B2
8085000	0.35	0.016	-2.52168	-3.33089	-0.110378	LRCH3
8145954	0.509	0.0383	-2.14663	-4.08141	-0.110622	TACC1
8041781	0.528	0.0427	-2.0972	-4.1735	-0.11079	EPAS1
8054209	0.498	0.0362	-2.17191	-4.03369	-0.1116	LYG1
7962831	0.533	0.044	-2.08303	-4.19959	-0.111613	CCNT1
8099304	0.33	0.014	-2.57597	-3.21509	-0.111914	ACOX3
7917741	0.543	0.0457	-2.06568	-4.23135	-0.11202	TMED5
8124059	0.404	0.0223	-2.38229	-3.62016	-0.112225	NUP153
8158317	0.56	0.0496	-2.02805	-4.29948	-0.112289	SPTAN1
8169882	0.492	0.0352	-2.18458	-4.00959	-0.11229	BCORL1
7963534	0.374	0.0186	-2.45928	-3.46184	-0.112336	KRT4
8179648	0.51	0.0387	-2.14142	-4.0912	-0.112461	GNL1
8049435	0.509	0.0382	-2.14749	-4.0798	-0.112511	SH3BP4
7992529	0.461	0.0299	-2.25592	-3.87198	-0.11253	TRAF7
7899797	0.532	0.0433	-2.09039	-4.18605	-0.112601	ZBTB8B
7985587	0.547	0.0464	-2.05919	-4.24315	-0.112756	SCAND2P
8120992	0.56	0.0496	-2.0284	-4.29886	-0.112988	ZNF292
8153201	0.393	0.0206	-2.41585	-3.55159	-0.113233	AGO2
8013812	0.461	0.03	-2.25531	-3.87318	-0.113506	PHF12
8156826	0.492	0.0353	-2.18258	-4.0134	-0.113533	TGFBR1
7941087	0.38	0.0192	-2.44508	-3.49129	-0.114454	PPP2R5B
7993223	0.322	0.0133	-2.59879	-3.16591	-0.114488	CLEC16A
8127698	0.25	0.00825	-2.7877	-2.7477	-0.115092	PHIP
8034099	0.471	0.032	-2.22624	-3.92965	-0.115174	MIR199A1
7990092	0.523	0.0415	-2.11036	-4.14915	-0.115467	MYO9A
7954077	0.368	0.0178	-2.47648	-3.42596	-0.115717	FAM234B
8155048	0.502	0.0368	-2.16427	-4.04816	-0.1158	RUSC2
8051622	0.55	0.0468	-2.05508	-4.25063	-0.115828	SRSF7
8055220	0.465	0.0309	-2.24158	-3.89991	-0.116173	POTEF
8094759	0.416	0.0241	-2.34959	-3.6863	-0.116284	NSUN7
8047538	0.525	0.0418	-2.10646	-4.15637	-0.11632	BMPR2
7970096	0.389	0.0203	-2.4235	-3.53585	-0.116573	ING1
7975545	0.436	0.0266	-2.30666	-3.7721	-0.116732	PSEN1
8158022	0.325	0.0137	-2.58651	-3.19242	-0.116797	ZNF79
7897305	0.411	0.0233	-2.36395	-3.65734	-0.117016	ZBTB48
7972699	0.535	0.0444	-2.07932	-4.2064	-0.117062	DAOA-AS1
7981538	0.256	0.00858	-2.77256	-2.78192	-0.117081	JAG2
8000638	0.508	0.0379	-2.15111	-4.073	-0.117326	SMG1P3
7960575	0.551	0.047	-2.0529	-4.25459	-0.117342	NOP2
7908041	0.467	0.0313	-2.23561	-3.9115	-0.117713	LAMC1
7996685	0.42	0.0245	-2.34228	-3.70097	-0.117782	EDC4
7998033	0.493	0.0355	-2.18084	-4.01672	-0.118395	TCF25
8074082	0.48	0.0335	-2.206	-3.96864	-0.118432	NCAPH2
8135422	0.381	0.0194	-2.44155	-3.49861	-0.118452	BCAP29
8098423	0.527	0.0422	-2.10229	-4.16409	-0.11853	NEIL3
8093829	0.45	0.0282	-2.28188	-3.82109	-0.119001	ZBTB49
7918725	0.169	0.00404	-3.06143	-2.10901	-0.119037	TRIM33
8016215	0.395	0.0209	-2.41101	-3.56151	-0.119111	ARHGAP27
7975851	0.355	0.0166	-2.50687	-3.36218	-0.119344	IFT43
8092933	0.504	0.0371	-2.16126	-4.05385	-0.119413	ACAP2
7968976	0.528	0.0426	-2.09876	-4.17061	-0.119426	LRCH1
8005029	0.385	0.0198	-2.43396	-3.5143	-0.119441	MAP2K4
8105499	0.198	0.00535	-2.95477	-2.36224	-0.119871	NDUFAF2
8068551	0.393	0.0206	-2.41595	-3.55138	-0.120191	DYRK1A
7955019	0.33	0.0141	-2.57475	-3.21771	-0.120512	ARID2
8052149	0.359	0.0169	-2.49871	-3.37935	-0.120601	PSME4
7984453	0.405	0.0224	-2.38086	-3.62306	-0.120742	PIAS1
8110450	0.519	0.0407	-2.11937	-4.13241	-0.120821	HNRNPAB
8123658	0.554	0.0476	-2.04764	-4.26414	-0.1209	SLC22A23
7991070	0.487	0.0344	-2.19399	-3.99165	-0.121419	HDGFRP3
8135277	0.216	0.00637	-2.88807	-2.51781	-0.121454	KMT2E
7975361	0.287	0.0103	-2.69877	-2.94701	-0.121518	SUSD6
7991630	0.301	0.0114	-2.66077	-3.03087	-0.121817	TM2D3
8116177	0.461	0.03	-2.25506	-3.87368	-0.121838	PHYKPL
8026007	0.41	0.0231	-2.36834	-3.64845	-0.121855	ZNF791
7986010	0.533	0.0441	-2.0822	-4.2011	-0.122429	IQGAP1
8032899	0.51	0.0386	-2.14247	-4.08924	-0.122765	TICAM1
7899519	0.394	0.0207	-2.41415	-3.55508	-0.122907	YTHDF2
8061986	0.378	0.019	-2.45071	-3.47962	-0.122923	ITCH
8000537	0.332	0.0143	-2.56789	-3.23243	-0.123044	PDXDC2P
8107474	0.4	0.0217	-2.39374	-3.59685	-0.123318	DMXL1
8152734	0.508	0.0379	-2.15136	-4.07252	-0.123709	FER1L6-AS1
8103867	0.38	0.0192	-2.44521	-3.49104	-0.123815	WWC2-AS2
8160682	0.525	0.0419	-2.10532	-4.15848	-0.123858	NOL6
8014259	0.539	0.045	-2.07287	-4.2182	-0.123972	SLFN14
8063000	0.508	0.038	-2.15045	-4.07424	-0.124126	WFDC2
8054308	0.488	0.0346	-2.19209	-3.99528	-0.124197	TBC1D8
8047262	0.554	0.0475	-2.04832	-4.26289	-0.124306	C2orf69
8082974	0.379	0.0191	-2.44878	-3.48363	-0.124495	ESYT3
7923453	0.462	0.0302	-2.25179	-3.88006	-0.12463	KDM5B
8151118	0.396	0.0212	-2.40421	-3.57544	-0.12476	VCPIP1
8141305	0.428	0.0255	-2.32472	-3.73614	-0.125144	ZNF394
7919578	0.554	0.0477	-2.04651	-4.26618	-0.125165	LOC100132147
7914021	0.369	0.018	-2.47412	-3.43091	-0.125294	SLC9A1
7965359	0.473	0.0323	-2.22279	-3.93631	-0.125382	ATP2B1
8009255	0.48	0.0333	-2.20844	-3.96394	-0.125431	CEP95
8031871	0.528	0.0424	-2.10022	-4.16791	-0.12544	ZNF274
8157487	0.525	0.0419	-2.10621	-4.15684	-0.125475	PAPPA-AS1
8052979	0.353	0.0163	-2.51455	-3.34597	-0.125628	SFXN5
8127051	0.508	0.038	-2.15037	-4.07439	-0.126337	TRAM2
8120468	0.458	0.0293	-2.26482	-3.85458	-0.126522	ADGRB3
8067543	0.532	0.0434	-2.08967	-4.18738	-0.126531	FLJ32154
8099581	0.505	0.0375	-2.15582	-4.0641	-0.126538	LCORL
8085393	0.511	0.0389	-2.13969	-4.09444	-0.126608	TMEM40
8083901	0.133	0.00265	-3.21781	-1.72841	-0.126619	FNDC3B
7983111	0.371	0.0182	-2.46772	-3.44426	-0.126823	SNAP23
8173713	0.403	0.0222	-2.38483	-3.61498	-0.126947	MAGT1
8090351	0.128	0.0025	-3.23852	-1.67722	-0.126973	ZXDC
8091458	0.436	0.0265	-2.30836	-3.76872	-0.127006	SERP1
8059731	0.539	0.0449	-2.07378	-4.21654	-0.127116	PDE6D
7971757	0.456	0.0292	-2.26731	-3.84972	-0.127208	NEK5
8166230	0.559	0.0492	-2.03171	-4.29291	-0.127377	TXLNG
8000501	0.351	0.0161	-2.51909	-3.33637	-0.127895	PDXDC2P
7943690	0.498	0.0362	-2.17161	-4.03425	-0.128017	DDX10
8111629	0.5	0.0365	-2.16762	-4.04181	-0.128313	NUP155
7985605	0.213	0.00615	-2.90203	-2.48542	-0.128348	ZNF592
7994006	0.311	0.0123	-2.62778	-3.10301	-0.128359	SMG1P3
7909628	0.517	0.0401	-2.12526	-4.12142	-0.128885	FLVCR1
7957052	0.34	0.0149	-2.55063	-3.26935	-0.128939	CCT2
8143279	0.456	0.0291	-2.26833	-3.84772	-0.128949	ZC3HAV1
7932023	0.518	0.0405	-2.12177	-4.12794	-0.129025	USP6NL
7899774	0.525	0.0419	-2.10583	-4.15753	-0.129077	HDAC1
8072461	0.527	0.0423	-2.10165	-4.16528	-0.129261	LIMK2
8111331	0.359	0.017	-2.49641	-3.3842	-0.129751	GOLPH3
7996954	0.192	0.00507	-2.97531	-2.31388	-0.129861	NFAT5
7997239	0.322	0.0132	-2.59981	-3.16372	-0.130007	PDXDC2P
7968333	0.332	0.0143	-2.56675	-3.23489	-0.130078	USPL1
8156476	0.192	0.0051	-2.9734	-2.31838	-0.130332	PHF2
8026638	0.36	0.0171	-2.49342	-3.39047	-0.130374	MYO9B
8000651	0.225	0.00689	-2.85783	-2.5876	-0.13041	BOLA2-SMG1P6
8122150	0.558	0.0485	-2.03833	-4.28097	-0.130565	EYA4
8000244	0.518	0.0404	-2.12194	-4.12761	-0.130681	USP31
8009183	0.31	0.0123	-2.62971	-3.09881	-0.130731	LIMD2
8155946	0.409	0.0229	-2.37203	-3.64098	-0.130797	VPS13A
7981377	0.359	0.017	-2.49697	-3.38301	-0.13086	ANKRD9
8013307	0.414	0.0239	-2.35394	-3.67753	-0.130911	FOXO3B
8124897	0.518	0.0403	-2.12345	-4.12481	-0.131031	PSORS1C3
8179727	0.518	0.0403	-2.12345	-4.12481	-0.131031	PSORS1C3
7961120	0.468	0.0317	-2.2307	-3.92102	-0.13106	CLEC7A
8076137	0.253	0.00846	-2.77802	-2.7696	-0.131236	SUN2
8108593	0.492	0.0353	-2.18312	-4.01238	-0.131246	DND1
7996081	0.554	0.0475	-2.04794	-4.26359	-0.131313	ADGRG1
8138789	0.558	0.0491	-2.03312	-4.29035	-0.131544	JAZF1
7920877	0.216	0.00633	-2.89073	-2.51164	-0.131858	ARHGEF2
7904254	0.401	0.0219	-2.39051	-3.60341	-0.131968	ATP1A1
8054227	0.501	0.0366	-2.16656	-4.04383	-0.132051	REV1
7989849	0.31	0.0123	-2.6301	-3.09796	-0.132386	DENND4A
8077458	0.558	0.0486	-2.0377	-4.2821	-0.132406	EDEM1
7925622	0.45	0.0282	-2.28228	-3.82031	-0.132491	AHCTF1
8021496	0.355	0.0165	-2.50965	-3.35632	-0.132583	KIAA1468
7986092	0.381	0.0194	-2.44236	-3.49693	-0.13269	FURIN
7912102	0.492	0.0354	-2.18235	-4.01384	-0.132816	KLHL21
8022251	0.355	0.0165	-2.50997	-3.35564	-0.132825	PPP4R1
8084921	0.451	0.0284	-2.27834	-3.82807	-0.13292	TNK2-AS1
8129418	0.369	0.018	-2.47199	-3.43534	-0.133009	PTPRK
7994559	0.385	0.0197	-2.43533	-3.51148	-0.133946	PDXDC2P
8079753	0.336	0.0146	-2.5587	-3.25211	-0.133965	DAG1
7963280	0.304	0.0115	-2.65511	-3.04329	-0.134187	SMAGP
8012212	0.0916	0.00154	-3.41407	-1.23627	-0.134212	ZBTB4
7941350	0.391	0.0204	-2.41975	-3.54358	-0.134296	PCNX3
8023995	0.505	0.0374	-2.1571	-4.06169	-0.134385	FSTL3
8049610	0.363	0.0174	-2.48741	-3.40309	-0.134393	KLHL30
8001064	0.483	0.0339	-2.20044	-3.9793	-0.134433	VN1R3
8043283	0.41	0.0232	-2.36646	-3.65225	-0.134445	KDM3A
8138581	0.334	0.0145	-2.56267	-3.24362	-0.134659	TRA2A
7906348	0.491	0.0351	-2.18583	-4.00721	-0.134698	CD1C
8118580	0.0901	0.00149	-3.42583	-1.20631	-0.134702	BRD2
8029193	0.233	0.00721	-2.84063	-2.6271	-0.134711	CIC
7991386	0.465	0.0308	-2.24269	-3.89776	-0.135219	GDPGP1
7996345	0.371	0.0184	-2.46372	-3.45259	-0.135251	CES2
7921014	0.189	0.00496	-2.98417	-2.29296	-0.135334	MEF2D
7967021	0.416	0.0241	-2.35038	-3.6847	-0.135516	PXN
8000834	0.352	0.0162	-2.51675	-3.34132	-0.135623	SMG1P3
8176624	0.525	0.042	-2.10448	-4.16004	-0.135806	DDX3Y
8067011	0.461	0.0298	-2.25725	-3.86939	-0.13586	ADNP
7956261	0.472	0.0322	-2.22393	-3.93411	-0.135961	RBMS2
8073842	0.487	0.0344	-2.19408	-3.99146	-0.136216	TTC38
8146243	0.329	0.0139	-2.57823	-3.21023	-0.136436	HOOK3
8089234	0.462	0.0301	-2.25376	-3.8762	-0.136475	ZBTB11
8058570	0.399	0.0215	-2.39852	-3.58708	-0.136519	KANSL1L
8085138	0.462	0.0303	-2.24988	-3.88378	-0.136604	OXTR
7946228	0.479	0.0332	-2.20963	-3.96166	-0.136657	TPP1
8007435	0.491	0.035	-2.18718	-4.00464	-0.136683	RUNDC1
7938422	0.418	0.0243	-2.34663	-3.69225	-0.136777	CTR9
8126312	0.447	0.0278	-2.28871	-3.80763	-0.136892	TFEB
8072374	0.48	0.0335	-2.2062	-3.96824	-0.136909	SLC35E4
8017235	0.42	0.0246	-2.34025	-3.70506	-0.13698	APPBP2
8137798	0.465	0.0309	-2.2424	-3.89833	-0.137066	PSMG3
7975453	0.434	0.0263	-2.31175	-3.76198	-0.13721	SNORD56B
8051528	0.493	0.0356	-2.17898	-4.02026	-0.137252	CEBPZ
7931405	0.464	0.0307	-2.24486	-3.89355	-0.137409	PPP2R2D
7929424	0.416	0.024	-2.35071	-3.68403	-0.137437	TBC1D12
8055104	0.445	0.0274	-2.29399	-3.79719	-0.137517	SAP130
8015460	0.321	0.0132	-2.60069	-3.16181	-0.137753	ACLY
7907790	0.398	0.0214	-2.40113	-3.58175	-0.137759	CEP350
8000890	0.371	0.0183	-2.46515	-3.44961	-0.137867	SEPHS2
8175492	0.42	0.0246	-2.34106	-3.70342	-0.137965	ATP11C
7979943	0.523	0.0415	-2.11035	-4.14916	-0.138046	MAP3K9
8007058	0.481	0.0336	-2.20506	-3.97044	-0.13806	WIPF2
8126018	0.306	0.0117	-2.64964	-3.05528	-0.1382	STK38
8069399	0.332	0.0142	-2.56996	-3.22799	-0.138222	DIP2A
8179504	0.103	0.00181	-3.3558	-1.38398	-0.13863	BRD2
8142307	0.508	0.0379	-2.15126	-4.0727	-0.138728	PNPLA8
8107868	0.42	0.0247	-2.33921	-3.70715	-0.138751	CDC42SE2
8045247	0.528	0.0427	-2.0976	-4.17275	-0.138937	PLEKHB2
8083737	0.133	0.00266	-3.21529	-1.73464	-0.138952	MIR15B
7998825	0.482	0.0339	-2.20134	-3.97756	-0.139059	PDPK1
8016789	0.494	0.0359	-2.17606	-4.0258	-0.139079	MBTD1
7982738	0.475	0.0327	-2.21757	-3.94637	-0.139132	BAHD1
7905999	0.305	0.0116	-2.65272	-3.04851	-0.139139	RUSC1
7940790	0.449	0.028	-2.28536	-3.81423	-0.139193	C11orf84
7969192	0.306	0.0117	-2.64893	-3.05683	-0.139364	FAM124A
8078818	0.347	0.0157	-2.52925	-3.31483	-0.139699	EXOG
8109194	0.45	0.0282	-2.28253	-3.81981	-0.139726	SLC26A2
8134821	0.197	0.00527	-2.96051	-2.34874	-0.139739	MEPCE
8097647	0.519	0.0406	-2.12061	-4.13011	-0.13989	ABCE1
7908376	0.419	0.0244	-2.34374	-3.69804	-0.139974	RGS18
7967685	0.533	0.0441	-2.0821	-4.20129	-0.140154	STX2
8169412	0.474	0.0325	-2.21937	-3.94291	-0.140516	ALG13
8063369	0.315	0.0127	-2.61665	-3.12721	-0.140594	RNF114
7900454	0.445	0.0275	-2.29265	-3.79985	-0.140667	EXO5
8013776	0.188	0.00487	-2.99095	-2.27693	-0.140786	FAM222B
8070961	0.477	0.0329	-2.21375	-3.95374	-0.140893	LSS
8068919	0.56	0.0493	-2.03071	-4.29469	-0.141016	PDXK
8032839	0.511	0.0389	-2.13976	-4.09432	-0.141226	SEMA6B
7922406	0.51	0.0387	-2.14162	-4.09083	-0.141427	SNORD79
7905881	0.484	0.0341	-2.1985	-3.98302	-0.141557	ADAM15
8144089	0.489	0.0347	-2.19021	-3.99887	-0.141571	LMBR1
8133477	0.33	0.014	-2.57545	-3.2162	-0.141809	GTF2IRD1
7965343	0.206	0.00577	-2.92643	-2.42859	-0.141838	POC1B-GALNT4
7959957	0.316	0.0128	-2.6145	-3.13189	-0.141962	ULK1
8028940	0.19	0.00498	-2.98237	-2.29723	-0.142246	EGLN2
8000217	0.22	0.00658	-2.87573	-2.54633	-0.143049	SMG1P3
7979698	0.42	0.0247	-2.33981	-3.70594	-0.143132	ATP6V1D
7906863	0.33	0.014	-2.57539	-3.21635	-0.143174	UAP1
8164087	0.395	0.0211	-2.40559	-3.57261	-0.14318	NR6A1
8104580	0.256	0.00856	-2.77332	-2.78022	-0.143331	OTULIN
8011077	0.29	0.0106	-2.68854	-2.96966	-0.143344	PITPNA
8151101	0.54	0.0452	-2.07106	-4.22152	-0.143394	MYBL1
8152096	0.154	0.00343	-3.12214	-1.96253	-0.143516	YWHAZ
8065018	0.33	0.0141	-2.5732	-3.22104	-0.143743	TASP1
7974851	0.484	0.0341	-2.19853	-3.98295	-0.143985	HIF1A
8046318	0.475	0.0327	-2.21758	-3.94636	-0.144052	DCAF17
7995128	0.558	0.0483	-2.04039	-4.27724	-0.144381	ITGAX
8174026	0.474	0.0325	-2.21962	-3.94244	-0.144547	YWHAQP8
7929201	0.162	0.00376	-3.08818	-2.04466	-0.144568	BTAF1
7977736	0.345	0.0155	-2.53552	-3.30153	-0.144754	RAB2B
8136259	0.376	0.0188	-2.45418	-3.47243	-0.144864	MKLN1
7948630	0.445	0.0274	-2.2942	-3.79679	-0.145009	FADS3
7978449	0.201	0.00555	-2.94083	-2.39491	-0.145037	HECTD1
8093576	0.411	0.0234	-2.36203	-3.66121	-0.14516	SCARNA22
8076533	0.367	0.0178	-2.47744	-3.42395	-0.145358	PACSIN2
8150036	0.415	0.0239	-2.35334	-3.67875	-0.14543	KIF13B
8093500	0.428	0.0256	-2.32424	-3.7371	-0.145463	TACC3
8051707	0.3	0.0113	-2.66489	-3.02181	-0.145733	MAP4K3
7908988	0.411	0.0234	-2.36214	-3.66098	-0.145907	SNRPE
7924603	0.458	0.0293	-2.26536	-3.85353	-0.145976	LBR
7964203	0.142	0.00299	-3.17272	-1.83925	-0.146113	BAZ2A
7942527	0.482	0.0337	-2.20305	-3.9743	-0.146115	POLD3
8140955	0.474	0.0324	-2.22068	-3.94039	-0.146188	CDK6
7996571	0.385	0.0197	-2.4358	-3.51051	-0.146306	FAM65A
7966135	0.313	0.0126	-2.62001	-3.11993	-0.14636	CORO1C
7906085	0.0669	0.000886	-3.60898	-0.73311	-0.146746	LMNA
8115783	0.382	0.0195	-2.44042	-3.50096	-0.1468	STK10
8074131	0.494	0.0359	-2.17597	-4.02597	-0.146909	SHANK3
8002592	0.323	0.0134	-2.59491	-3.1743	-0.146936	AP1G1
8089759	0.409	0.0228	-2.37259	-3.63985	-0.147225	TMEM39A
8046646	0.48	0.0334	-2.20823	-3.96436	-0.147554	OSBPL6
7918449	0.515	0.0397	-2.12973	-4.11309	-0.14778	KCNA2
7900051	0.203	0.00561	-2.93687	-2.4042	-0.147802	AGO3
8152041	0.355	0.0165	-2.51011	-3.35535	-0.147865	RNF19A
8027169	0.113	0.00209	-3.30373	-1.51486	-0.147939	GATAD2A
7927285	0.375	0.0187	-2.45718	-3.46621	-0.14799	RHEB
7899253	0.264	0.00911	-2.74894	-2.83509	-0.148002	ZDHHC18
7947221	0.506	0.0376	-2.15468	-4.06626	-0.148188	LIN7C
8093961	0.133	0.00265	-3.21794	-1.72809	-0.148375	KIAA0232
8040190	0.239	0.00771	-2.81428	-2.68733	-0.148507	GRHL1
8079140	0.33	0.014	-2.57734	-3.21215	-0.148785	SNRK
8169519	0.448	0.0279	-2.28714	-3.81072	-0.148792	WDR44
7957806	0.492	0.0353	-2.18343	-4.01179	-0.149139	SCYL2
7929609	0.312	0.0124	-2.62426	-3.11068	-0.149271	C10orf12
8105013	0.413	0.0237	-2.35635	-3.67267	-0.149277	EGFLAM
8084173	0.432	0.026	-2.31707	-3.7514	-0.149405	ATP11B
7928705	0.48	0.0335	-2.20569	-3.96923	-0.149436	TSPAN14
7952830	0.295	0.0109	-2.67719	-2.99473	-0.149637	NCAPD3
8021914	0.502	0.0367	-2.16505	-4.04667	-0.149708	ADNP2
8131067	0.532	0.0435	-2.0883	-4.1899	-0.149708	GPR146
8149793	0.403	0.0221	-2.38648	-3.61164	-0.149729	ENTPD4
7950838	0.171	0.0041	-3.05604	-2.12195	-0.14973	PICALM
8023377	0.26	0.00884	-2.76051	-2.80908	-0.149749	MEX3C
8121685	0.213	0.00617	-2.90029	-2.48947	-0.149752	DCBLD1
8052803	0.16	0.00368	-3.09648	-2.02465	-0.149867	AAK1
7909545	0.51	0.0386	-2.14292	-4.08839	-0.150064	TRAF5
7972369	0.541	0.0454	-2.06886	-4.22553	-0.150207	UGGT2
8089261	0.401	0.0219	-2.39017	-3.60412	-0.150323	CBLB
8135480	0.471	0.032	-2.2263	-3.92954	-0.150563	DNAJB9
7914112	0.551	0.0471	-2.05204	-4.25615	-0.150676	FGR
8079517	0.551	0.047	-2.0534	-4.25368	-0.150736	KLHL18
8081740	0.463	0.0304	-2.24862	-3.88623	-0.150852	ATP6V1A
8151572	0.525	0.042	-2.10485	-4.15935	-0.150883	SNX16
8129089	0.453	0.0286	-2.27563	-3.83338	-0.151145	TSPYL4
7915926	0.431	0.0258	-2.32007	-3.74541	-0.151436	STIL
8007537	0.543	0.0457	-2.06608	-4.23061	-0.151489	CD300LG
7963092	0.558	0.0488	-2.03596	-4.28524	-0.151673	FMNL3
7946201	0.349	0.0158	-2.52617	-3.32138	-0.151748	ARFIP2
7915015	0.179	0.00437	-3.03181	-2.17986	-0.151831	GNL2
8052669	0.381	0.0193	-2.44305	-3.49552	-0.15192	SERTAD2
7910539	0.332	0.0143	-2.56867	-3.23077	-0.152025	EXOC8
7942489	0.335	0.0145	-2.56147	-3.24618	-0.152442	DNAJB13
8072610	0.464	0.0307	-2.24472	-3.89381	-0.152543	FBXO7
7934244	0.201	0.00554	-2.94178	-2.39269	-0.152735	DNAJB12
8028286	0.33	0.014	-2.57595	-3.21514	-0.152772	SIPA1L3
8064432	0.528	0.0424	-2.10052	-4.16737	-0.152779	FKBP1A
7990683	0.48	0.0334	-2.20772	-3.96533	-0.152865	ACSBG1
8167763	0.548	0.0465	-2.05845	-4.2445	-0.152965	TSPYL2
7929990	0.396	0.0212	-2.40516	-3.5735	-0.153089	PPRC1
8076937	0.35	0.016	-2.52273	-3.32867	-0.153201	HDAC10
8037144	0.306	0.0117	-2.65006	-3.05436	-0.153328	DEDD2
8017675	0.231	0.00714	-2.8443	-2.61869	-0.153345	PLEKHM1P1
8072346	0.558	0.0487	-2.0368	-4.28373	-0.153565	MTFP1
7938154	0.0934	0.00162	-3.39503	-1.28468	-0.153586	ILK
8088339	0.225	0.00688	-2.85835	-2.58642	-0.153703	ARF4
8068266	0.507	0.0378	-2.15231	-4.07073	-0.153708	IFNAR1
8037794	0.41	0.023	-2.36893	-3.64726	-0.153713	PRKD2
8075126	0.137	0.00277	-3.2013	-1.7691	-0.153931	MN1
8011945	0.453	0.0288	-2.273	-3.83856	-0.153968	KIAA0753
7994152	0.0901	0.00149	-3.42442	-1.2099	-0.153983	CACNG3
8158560	0.505	0.0374	-2.15658	-4.06268	-0.154094	TOR1B
8109403	0.339	0.0148	-2.5528	-3.26471	-0.154171	MFAP3
8114171	0.3	0.0113	-2.66237	-3.02734	-0.154279	CDKL3
8164165	0.318	0.0129	-2.60912	-3.14356	-0.154398	HSPA5
8016239	0.493	0.0355	-2.18073	-4.01692	-0.154691	PLEKHM1
7900119	0.521	0.0411	-2.11415	-4.14211	-0.154709	THRAP3
7903294	0.424	0.0252	-2.33102	-3.72355	-0.154729	MFSD14A
7929750	0.349	0.0159	-2.52416	-3.32563	-0.154772	ENTPD7
8011262	0.354	0.0164	-2.51247	-3.35035	-0.154816	MNT
7899627	0.411	0.0233	-2.36471	-3.6558	-0.155168	TINAGL1
8047606	0.533	0.0442	-2.0814	-4.20258	-0.155623	NBEAL1
8096635	0.465	0.0309	-2.24186	-3.89937	-0.155707	NFKB1
8002470	0.51	0.0386	-2.14309	-4.08807	-0.155753	HYDIN2
8165416	0.519	0.0407	-2.11906	-4.13299	-0.156127	ENTPD2
8132897	0.485	0.0342	-2.19668	-3.9865	-0.156159	LANCL2
7898988	0.404	0.0223	-2.38258	-3.61957	-0.156168	CLIC4
7926900	0.493	0.0355	-2.18112	-4.01619	-0.156286	MAP3K8
7925201	0.431	0.0258	-2.32	-3.74556	-0.156365	ARID4B
8057394	0.401	0.0218	-2.3926	-3.59916	-0.156378	SESTD1
8091009	0.428	0.0255	-2.32501	-3.73557	-0.156632	PIK3CB
8029437	0.145	0.00309	-3.16041	-1.86937	-0.156688	PVR
7998136	0.0363	0.000363	-3.91593	0.08449	-0.156701	RHBDF1
8049317	0.412	0.0236	-2.35883	-3.66767	-0.156801	DGKD
8074432	0.166	0.00391	-3.07333	-2.08044	-0.156921	HIRA
8058498	0.51	0.0386	-2.14238	-4.08939	-0.157015	FZD5
7987584	0.141	0.00294	-3.17903	-1.82378	-0.157089	INO80
8076046	0.287	0.0104	-2.69633	-2.9524	-0.157197	TMEM184B
8114083	0.0501	0.00057	-3.76204	-0.32899	-0.157197	AFF4
8098177	0.488	0.0346	-2.19179	-3.99584	-0.157274	KLHL2
8066964	0.258	0.00872	-2.7663	-2.79604	-0.158019	TMEM189-UBE2V1
8098904	0.433	0.0261	-2.31493	-3.75565	-0.158181	SLBP
7906819	0.0925	0.00158	-3.40489	-1.25963	-0.158347	ATF6
8112728	0.431	0.0259	-2.31893	-3.74769	-0.158364	RAP1B
8167287	0.462	0.0301	-2.25308	-3.87754	-0.158414	PORCN
8103911	0.322	0.0133	-2.59783	-3.16798	-0.158433	IRF2
8084634	0.479	0.0332	-2.21002	-3.96091	-0.158445	DNAJB11
7904303	0.393	0.0206	-2.41603	-3.55122	-0.158523	CD101
8101043	0.31	0.0122	-2.6315	-3.09492	-0.158702	G3BP2
7933877	0.328	0.0138	-2.58113	-3.204	-0.158762	JMJD1C
8162676	0.0597	0.000735	-3.67396	-0.56247	-0.159021	TSTD2
8018823	0.398	0.0213	-2.40162	-3.58075	-0.159332	TMC6
7976407	0.401	0.0219	-2.39026	-3.60393	-0.159431	FAM181A
7980744	0.518	0.0404	-2.12262	-4.12635	-0.159839	RPS6KA5
7923967	0.479	0.0333	-2.20951	-3.9619	-0.160517	YOD1
7924526	0.267	0.00928	-2.7415	-2.85177	-0.160525	TP53BP2
7986446	0.53	0.043	-2.09446	-4.17856	-0.160733	ALDH1A3
8097388	0.251	0.00832	-2.7847	-2.7545	-0.160943	LARP1B
8069532	0.525	0.0417	-2.10762	-4.15422	-0.160958	HSPA13
8126760	0.292	0.0107	-2.68476	-2.97801	-0.16098	RCAN2
7928395	0.151	0.00334	-3.13252	-1.93733	-0.161078	FLJ44715
7957478	0.334	0.0145	-2.5636	-3.24162	-0.161273	TMTC3
8143417	0.128	0.0025	-3.23908	-1.67583	-0.161345	BRAF
8105647	0.559	0.0493	-2.03151	-4.29325	-0.161502	TRAPPC13
7950162	0.225	0.00689	-2.85808	-2.58704	-0.16158	PDE2A
8098342	0.512	0.0391	-2.13771	-4.09815	-0.16162	SAP30
8134219	0.388	0.0201	-2.42644	-3.5298	-0.161653	VPS50
7977803	0.517	0.0401	-2.12562	-4.12077	-0.161732	RBM23
8125007	0.532	0.0433	-2.09134	-4.18431	-0.16182	LY6G5C
8011396	0.361	0.0172	-2.49072	-3.39614	-0.161931	SHPK
8083063	0.445	0.0275	-2.2931	-3.79895	-0.161994	SLC25A36
8017718	0.182	0.00452	-3.0188	-2.21085	-0.162186	AXIN2
8131179	0.319	0.013	-2.60772	-3.14658	-0.162643	TTYH3
7949264	0.0925	0.00158	-3.40557	-1.2579	-0.16282	EHD1
7906564	0.324	0.0135	-2.59139	-3.18189	-0.163021	PEA15
7956211	0.0927	0.00159	-3.40291	-1.26465	-0.163058	MYL6
8123407	0.334	0.0145	-2.56255	-3.24388	-0.163078	AFDN
8029507	0.217	0.00645	-2.88376	-2.52777	-0.163755	NECTIN2
7940798	0.254	0.0085	-2.77615	-2.77382	-0.163801	MARK2
8152148	0.137	0.00284	-3.19228	-1.79127	-0.163885	UBR5
7898693	0.534	0.0443	-2.08074	-4.20378	-0.164095	ALPL
8044304	0.171	0.00411	-3.05463	-2.12531	-0.164151	RGPD6
7997525	0.561	0.0498	-2.02608	-4.30302	-0.164302	MLYCD
7956937	0.393	0.0207	-2.41504	-3.55324	-0.164385	RAP1B
8054557	0.175	0.00425	-3.04185	-2.1559	-0.16446	RGPD6
7923183	0.221	0.00663	-2.8726	-2.55357	-0.164476	ZNF281
8114158	0.216	0.00637	-2.88797	-2.51803	-0.16462	PPP2CA
8093807	0.0628	0.000817	-3.63737	-0.65873	-0.16498	DOK7
8154951	0.401	0.0218	-2.39325	-3.59784	-0.165116	GLUL
8069553	0.298	0.0112	-2.66826	-3.01439	-0.165219	NRIP1
8130102	0.317	0.0128	-2.61182	-3.13771	-0.165295	KATNA1
7994161	0.125	0.00244	-3.24799	-1.65375	-0.165345	RBBP6
8173892	0.359	0.017	-2.49663	-3.38372	-0.165693	CHM
8161648	0.271	0.00946	-2.73378	-2.86905	-0.165727	KLF9
7944049	0.235	0.00737	-2.83196	-2.64695	-0.165835	SIDT2
8172858	0.3	0.0113	-2.66269	-3.02664	-0.166161	IQSEC2
7915160	0.462	0.0301	-2.25288	-3.87793	-0.16618	RRAGC
7933084	0.541	0.0454	-2.06964	-4.22411	-0.166197	NAMPT
8095187	0.347	0.0157	-2.52881	-3.31579	-0.166347	CEP135
7953715	0.405	0.0224	-2.38071	-3.62337	-0.166352	NECAP1
8102998	0.472	0.0322	-2.22427	-3.93346	-0.166492	GYPA
8157270	0.515	0.0397	-2.13035	-4.11193	-0.166527	SLC31A1
7922976	0.454	0.0289	-2.27141	-3.84167	-0.166693	PTGS2
7979033	0.355	0.0166	-2.50599	-3.36403	-0.166701	SAV1
8135915	0.323	0.0134	-2.59355	-3.17724	-0.166922	HILPDA
7899939	0.279	0.00986	-2.71773	-2.90487	-0.167013	GJA4
8031748	0.457	0.0292	-2.26656	-3.85119	-0.167126	ZNF749
8092564	0.151	0.00332	-3.13462	-1.93222	-0.167234	TRA2B
8076515	0.308	0.012	-2.63764	-3.08152	-0.167393	ARFGAP3
8114583	0.336	0.0147	-2.55789	-3.25385	-0.167399	SRA1
7945132	0.396	0.0212	-2.40477	-3.57431	-0.167659	FLI1
7965800	0.14	0.00291	-3.18355	-1.81272	-0.167763	CHPT1
8111698	0.139	0.00287	-3.18751	-1.803	-0.168027	RICTOR
7957072	0.493	0.0354	-2.18156	-4.01534	-0.168034	RAB3IP
8037186	0.474	0.0325	-2.21908	-3.94346	-0.168078	LIPE
7962441	0.184	0.00467	-3.00702	-2.23885	-0.168082	TWF1
7989073	0.561	0.0498	-2.02648	-4.3023	-0.168162	PRTG
7968199	0.33	0.014	-2.57528	-3.21658	-0.168224	CDK8
8050719	0.166	0.0039	-3.07436	-2.07794	-0.168309	ITSN2
8174103	0.522	0.0414	-2.11178	-4.14651	-0.168393	GK3P
8108080	0.397	0.0213	-2.40212	-3.57973	-0.168561	JADE2
8019392	0.456	0.0291	-2.2687	-3.84699	-0.168648	FASN
8136179	0.525	0.042	-2.10504	-4.15901	-0.168692	KLHDC10
8023914	0.0276	0.000241	-4.05385	0.46053	-0.168877	PQLC1
8045889	0.338	0.0148	-2.55507	-3.25987	-0.168945	TANC1
7925043	0.19	0.00498	-2.98205	-2.29798	-0.16898	EXOC8
8124726	0.251	0.00829	-2.78591	-2.75175	-0.16907	TRIM26
8061186	0.108	0.00195	-3.32973	-1.44965	-0.169088	SEC23B
7949916	0.469	0.0318	-2.22919	-3.92394	-0.169091	CHKA
8175666	0.29	0.0106	-2.68852	-2.96969	-0.169602	GABRE
8086517	0.172	0.00414	-3.05189	-2.13187	-0.169961	CDCP1
8063211	0.406	0.0226	-2.37679	-3.63133	-0.170176	NCOA3
8137627	0.0848	0.00133	-3.46514	-1.10575	-0.170267	TMEM135
7938348	0.338	0.0148	-2.55429	-3.26154	-0.170274	WEE1
7972557	0.464	0.0306	-2.24562	-3.89207	-0.170286	GPR183
7943562	0.424	0.0251	-2.33177	-3.72204	-0.17029	ELMOD1
8072577	0.157	0.00355	-3.1096	-1.99292	-0.170374	YWHAH
8063315	0.304	0.0115	-2.65468	-3.04423	-0.170456	DDX27
7909418	0.327	0.0138	-2.58276	-3.20048	-0.170517	LOC148696
8058940	0.349	0.0159	-2.5251	-3.32364	-0.170629	USP37
7948696	0.225	0.00685	-2.86048	-2.5815	-0.170752	MTA2
7900395	0.169	0.00402	-3.06335	-2.10439	-0.170821	RLF
8114658	0.41	0.023	-2.37039	-3.6443	-0.170852	DIAPH1
8031737	0.142	0.00301	-3.17053	-1.84461	-0.170873	ZNF548
8102249	0.451	0.0284	-2.27902	-3.82671	-0.171054	ETNPPL
7984132	0.225	0.00686	-2.85952	-2.58372	-0.17112	USP3
8130185	0.313	0.0126	-2.61975	-3.12049	-0.171294	ZBTB2
8054676	0.145	0.00309	-3.1604	-1.86939	-0.17147	RGPD6
8152222	0.142	0.00302	-3.1687	-1.8491	-0.171891	AZIN1
8158725	0.0483	0.000543	-3.77864	-0.28472	-0.171971	ABL1
8081036	0.308	0.012	-2.64024	-3.07584	-0.17228	CADM2
8082965	0.408	0.0227	-2.37487	-3.63522	-0.172294	MRAS
8152867	0.328	0.0139	-2.58009	-3.20625	-0.172364	ASAP1
8005141	0.322	0.0133	-2.59701	-3.16975	-0.172616	TTC19
8048411	0.307	0.0119	-2.64408	-3.06744	-0.172905	TTLL4
8133670	0.0378	0.000392	-3.88999	0.01431	-0.172988	POR
8020220	0.45	0.0281	-2.28416	-3.8166	-0.173049	TUBB6
8132118	0.297	0.011	-2.67219	-3.00574	-0.173224	AQP1
8001784	0.493	0.0355	-2.18088	-4.01664	-0.17334	CDH8
8061772	0.371	0.0182	-2.46923	-3.4411	-0.173361	MAPRE1
8054532	0.151	0.00334	-3.13221	-1.93808	-0.173364	RGPD6
8150318	0.0374	0.000384	-3.89715	0.03366	-0.173592	FGFR1
8019316	0.368	0.0179	-2.47619	-3.42658	-0.173638	PYCR1
8028233	0.294	0.0109	-2.67927	-2.99012	-0.173819	HKR1
8032650	0.142	0.00299	-3.17244	-1.83993	-0.173838	PIP5K1C
7986049	0.308	0.012	-2.64025	-3.07581	-0.173902	CRTC3
7955179	0.514	0.0396	-2.13122	-4.1103	-0.174132	TUBA1C
7981460	0.13	0.00257	-3.22923	-1.70021	-0.174217	PPP1R13B
8103922	0.249	0.00823	-2.78882	-2.74517	-0.174327	CASP3
8041212	0.359	0.017	-2.49695	-3.38305	-0.174411	LCLAT1
8119408	0.166	0.0039	-3.07428	-2.07814	-0.174577	NFYA
7914282	0.245	0.008	-2.79983	-2.72019	-0.174632	SDC3
8069838	0.409	0.0229	-2.37183	-3.64139	-0.174655	KRTAP19-5
8063386	0.216	0.00631	-2.89207	-2.50852	-0.174676	CEBPB
7910550	0.341	0.015	-2.54759	-3.27585	-0.174769	TSNAX-DISC1
8119918	0.307	0.0118	-2.64464	-3.06622	-0.174792	C6orf223
8135922	0.532	0.0433	-2.09093	-4.18506	-0.175138	METTL2B
7917707	0.432	0.026	-2.31706	-3.75143	-0.175162	EVI5
8113010	0.235	0.00742	-2.82906	-2.6536	-0.175255	CCNH
8180323	0.188	0.0049	-2.98879	-2.28204	-0.175326	USP12
8014706	0.0612	0.000767	-3.65908	-0.60167	-0.175617	PCGF2
8116622	0.369	0.0179	-2.47418	-3.43077	-0.175708	RIPK1
8145281	0.303	0.0115	-2.65736	-3.03835	-0.175717	SLC25A37
8149448	0.39	0.0204	-2.42134	-3.5403	-0.17574	MSR1
8066848	0.558	0.0485	-2.03829	-4.28103	-0.175834	PREX1
7924207	0.14	0.0029	-3.18378	-1.81213	-0.17605	PTPN14
8124798	0.217	0.00647	-2.88249	-2.53072	-0.176074	PPP1R18
8102912	0.235	0.00744	-2.82819	-2.65558	-0.176173	TBC1D9
7967255	0.295	0.0109	-2.67768	-2.99363	-0.176357	CLIP1
7900216	0.0488	0.000554	-3.77179	-0.303	-0.176537	AKIRIN1
8083569	0.222	0.0067	-2.86859	-2.56283	-0.177043	TIPARP
8005235	0.185	0.00468	-3.00623	-2.24073	-0.17709	MPRIP
8174253	0.535	0.0445	-2.07839	-4.2081	-0.17723	MORF4L2
8161192	0.199	0.00539	-2.9522	-2.36827	-0.177332	RNF38
8002878	0.444	0.0273	-2.29604	-3.79314	-0.177373	TMEM170A
8032009	0.282	0.0101	-2.70687	-2.92903	-0.177577	MIER2
8009517	0.288	0.0105	-2.69399	-2.9576	-0.177661	SOX9
7953135	0.312	0.0125	-2.62385	-3.11157	-0.177729	TULP3
8084891	0.476	0.0328	-2.21595	-3.9495	-0.177834	FAM43A
8013071	0.385	0.0198	-2.43403	-3.51415	-0.177864	FLCN
8017312	0.0889	0.00143	-3.439	-1.17267	-0.177927	MED13
8016841	0.467	0.0312	-2.23773	-3.9074	-0.17806	TMEM100
8080100	0.292	0.0108	-2.6825	-2.983	-0.178123	RAD54L2
7995712	0.158	0.0036	-3.10429	-2.00578	-0.178464	CAPNS2
8018922	0.183	0.00461	-3.01191	-2.22725	-0.178483	CYTH1
7972888	0.253	0.00846	-2.77801	-2.76962	-0.178498	PCID2
8017162	0.235	0.0074	-2.8304	-2.65053	-0.178804	RNFT1
7984364	0.369	0.018	-2.47368	-3.43182	-0.178843	SMAD3
7908614	0.308	0.012	-2.64045	-3.07536	-0.179356	CAMSAP2
7899504	0.412	0.0235	-2.36011	-3.66509	-0.179365	GMEB1
8081779	0.371	0.0182	-2.46876	-3.44208	-0.179583	ZDHHC23
8093336	0.199	0.00539	-2.95243	-2.36771	-0.180577	ZNF141
7933750	0.482	0.0338	-2.20256	-3.97523	-0.180604	SLC16A9
7929072	0.521	0.0411	-2.11485	-4.14081	-0.180608	IFIT5
8105506	0.184	0.00466	-3.00714	-2.23856	-0.180954	ZSWIM6
7907861	0.158	0.0036	-3.10409	-2.00625	-0.180964	XPR1
8108873	0.0608	0.000755	-3.6645	-0.58739	-0.181236	ARHGAP26
8027584	0.224	0.00678	-2.86395	-2.5735	-0.181242	KCTD15
7953291	0.344	0.0153	-2.54024	-3.29148	-0.181767	CD9
8017843	0.409	0.0229	-2.37235	-3.64032	-0.181984	SLC16A6
7956287	0.127	0.00247	-3.2431	-1.66587	-0.18212	NAB2
7939902	0.195	0.00521	-2.96523	-2.33764	-0.18238	LOC646813
7915392	0.163	0.00378	-3.08633	-2.04914	-0.182686	HIVEP3
8000167	0.0612	0.000773	-3.65636	-0.60882	-0.18311	SMG1P3
7959102	0.508	0.0379	-2.15069	-4.07378	-0.183167	HSPB8
8005814	0.353	0.0163	-2.51333	-3.34853	-0.183465	NLK
8133788	0.271	0.00946	-2.73413	-2.86826	-0.183568	PTPN12
7921228	0.219	0.00654	-2.87822	-2.54058	-0.183646	ETV3
7919800	0.532	0.0435	-2.08916	-4.18832	-0.18367	CTSS
8072626	0.135	0.00272	-3.2081	-1.75236	-0.183682	TIMP3
8075550	0.208	0.00592	-2.91625	-2.45234	-0.183936	C22orf24
8084971	0.207	0.00588	-2.91928	-2.44528	-0.184085	SENP5
8019486	0.36	0.0171	-2.49446	-3.38828	-0.184094	SECTM1
8061262	0.264	0.00912	-2.74823	-2.83669	-0.184199	NAA20
8044927	0.288	0.0105	-2.69335	-2.95901	-0.184582	INHBB
7971813	0.319	0.013	-2.60549	-3.15142	-0.184687	THSD1
8112220	0.0763	0.00113	-3.52386	-0.95452	-0.184705	PDE4D
8087833	0.179	0.0044	-3.02944	-2.18552	-0.184827	DUSP7
7943176	0.519	0.0407	-2.11924	-4.13265	-0.18494	MED17
7978748	0.306	0.0118	-2.64646	-3.06223	-0.185088	FBXO33
8012397	0.196	0.00526	-2.96185	-2.34558	-0.185178	BORCS6
7988713	0.179	0.00441	-3.02858	-2.18757	-0.185387	TRPM7
7956076	0.324	0.0135	-2.59262	-3.17924	-0.18556	CDK2
7940717	0.424	0.025	-2.33317	-3.71925	-0.185791	SLC3A2
8146500	0.503	0.0369	-2.16302	-4.05053	-0.186214	LYN
8088065	0.345	0.0154	-2.53693	-3.29853	-0.186448	SFMBT1
8004671	0.0446	0.000489	-3.81449	-0.18883	-0.186475	KDM6B
8103630	0.151	0.00332	-3.13376	-1.93431	-0.186506	SH3RF1
7981290	0.34	0.015	-2.54874	-3.27339	-0.186592	WARS
7974455	0.253	0.0084	-2.78087	-2.76316	-0.186601	MAPK1IP1L
7977584	0.0612	0.000766	-3.65957	-0.60036	-0.186834	TMEM55B
8003611	0.353	0.0163	-2.51376	-3.34764	-0.186954	FAM57A
7919197	0.248	0.00814	-2.79289	-2.73595	-0.187221	POLR3GL
8126066	0.206	0.00576	-2.92663	-2.42813	-0.187384	MTCH1
8044745	0.419	0.0244	-2.34389	-3.69774	-0.187621	DDX18
7933933	0.395	0.0209	-2.41071	-3.56214	-0.187801	DNAJC12
8119169	0.157	0.00357	-3.10759	-1.9978	-0.188094	TBC1D22B
7934842	0.114	0.00215	-3.29425	-1.53858	-0.188176	MMRN2
7983953	0.176	0.00429	-3.03898	-2.16276	-0.188218	RNF111
8005847	0.0227	0.000186	-4.14046	0.6991	-0.188324	TNFAIP1
8158059	0.137	0.00278	-3.20041	-1.77129	-0.188345	STXBP1
7911329	0.51	0.0387	-2.14183	-4.09043	-0.18867	LOC100134822
8081853	0.482	0.0339	-2.20158	-3.97712	-0.188723	POGLUT1
7958200	0.114	0.00215	-3.29332	-1.54089	-0.188835	EID3
8075728	0.31	0.0123	-2.63016	-3.09783	-0.189096	MYH9
8151816	0.234	0.00732	-2.83476	-2.64056	-0.189166	GEM
8041592	0.156	0.00349	-3.11579	-1.97794	-0.18932	EML4
8173615	0.151	0.00331	-3.13534	-1.93046	-0.189701	RLIM
7947230	0.543	0.0458	-2.06564	-4.23141	-0.190084	BDNF
7949971	0.287	0.0103	-2.6993	-2.94583	-0.190133	CPT1A
7963328	0.308	0.012	-2.63766	-3.08147	-0.190301	FIGNL2
7946211	0.217	0.00644	-2.8842	-2.52676	-0.190336	RRP8
8047161	0.242	0.00786	-2.80675	-2.70446	-0.190395	NABP1
8076331	0.0763	0.00114	-3.52039	-0.96347	-0.190418	TOB2
7898030	0.388	0.0201	-2.42668	-3.52931	-0.190513	PRAMEF20
8019183	0.533	0.044	-2.08346	-4.1988	-0.190656	ACTG1
8149707	0.141	0.00296	-3.17631	-1.83045	-0.190709	BIN3
8138735	0.423	0.0249	-2.33494	-3.71571	-0.190762	HOXA5
8088415	0.0612	0.000774	-3.65623	-0.60916	-0.190971	FAM107A
8075182	0.151	0.00332	-3.13392	-1.93391	-0.191427	XBP1
8168432	0.515	0.0398	-2.12889	-4.11466	-0.191491	RLIM
8013906	0.183	0.00458	-3.01365	-2.22311	-0.191613	TWF1
8034151	0.112	0.00208	-3.30634	-1.50833	-0.191682	DOCK6
8050190	0.355	0.0166	-2.5078	-3.36021	-0.191911	ADAM17
8055465	0.458	0.0293	-2.26459	-3.85504	-0.192084	CXCR4
8174684	0.0889	0.00143	-3.44036	-1.16921	-0.192245	NKRF
7942503	0.424	0.025	-2.33438	-3.71683	-0.192327	PPME1
7947784	0.157	0.00355	-3.10909	-1.99416	-0.192644	ARFGAP2
8160756	0.361	0.0173	-2.49026	-3.39711	-0.193021	DCAF12
7951038	0.424	0.0252	-2.33114	-3.72332	-0.193267	SNORA40
8145365	0.513	0.0394	-2.13384	-4.10541	-0.193671	DOCK5
8122684	0.532	0.0436	-2.08772	-4.19096	-0.193895	SUMO4
7904883	0.253	0.00844	-2.77894	-2.76751	-0.194158	CHD1L
7899436	0.414	0.0238	-2.35454	-3.67633	-0.194535	SESN2
8032804	0.0857	0.00136	-3.45904	-1.12139	-0.194601	SH3GL1
8019308	0.199	0.00543	-2.94974	-2.37405	-0.194665	MAFG
8075130	0.345	0.0154	-2.53684	-3.29873	-0.194695	PITPNB
8002692	0.0205	0.000163	-4.18428	0.82046	-0.194705	ZFHX3
7911371	0.381	0.0193	-2.44368	-3.4942	-0.194901	PERM1
8076792	0.28	0.00992	-2.71505	-2.91084	-0.195002	CERK
7901219	0.431	0.0258	-2.31963	-3.74629	-0.195498	NSUN4
8137979	0.207	0.00586	-2.92048	-2.44247	-0.196208	ACTB
8158424	0.0436	0.000474	-3.82539	-0.1596	-0.196352	LRRC8A
7944493	0.192	0.00507	-2.97584	-2.31264	-0.196677	CBL
7952986	0.148	0.00323	-3.14492	-1.90716	-0.196738	WNK1
8099259	0.142	0.00299	-3.17273	-1.83924	-0.196915	AFAP1
8077786	0.532	0.0436	-2.08751	-4.19135	-0.197072	IRAK2
8132503	0.282	0.0101	-2.70758	-2.92744	-0.19738	STK17A
7969651	0.248	0.00811	-2.79455	-2.73218	-0.197382	DNAJC3
8161701	0.417	0.0242	-2.34832	-3.68884	-0.197383	TMEM2
7923753	0.112	0.00207	-3.30687	-1.50701	-0.19745	NUAK2
7939910	0.137	0.00279	-3.19885	-1.77513	-0.197566	OR4C46
8068105	0.0932	0.00162	-3.39655	-1.28082	-0.197851	BACH1
7939595	0.233	0.00722	-2.83984	-2.62892	-0.198307	CRY2
8101304	0.199	0.00542	-2.95017	-2.37303	-0.198356	RASGEF1B
8063716	0.453	0.0287	-2.27397	-3.83664	-0.198682	TUBB1
8020323	0.331	0.0141	-2.57243	-3.22269	-0.198729	RNMT
7962274	0.388	0.02	-2.42817	-3.52624	-0.198741	KIF21A
7999553	0.198	0.00535	-2.95513	-2.36139	-0.198884	CPPED1
8023401	0.368	0.0179	-2.47528	-3.42847	-0.198933	CCDC68
8166469	0.413	0.0237	-2.35605	-3.67327	-0.199394	SAT1
8050240	0.337	0.0147	-2.55618	-3.2575	-0.199617	ODC1
8179638	0.148	0.00321	-3.14622	-1.90397	-0.199691	TRIM26
8128013	0.22	0.0066	-2.87447	-2.54926	-0.199823	RARS2
8026971	0.433	0.0262	-2.31445	-3.75661	-0.200273	IFI30
8054414	0.0674	0.000909	-3.60007	-0.75641	-0.200646	RGPD2
8139033	0.416	0.0241	-2.34918	-3.68711	-0.20096	AOAH
8012099	0.33	0.0141	-2.57428	-3.21872	-0.201183	PHF23
8055096	0.126	0.00244	-3.24698	-1.65626	-0.20133	AMMECR1L
8027398	0.124	0.00239	-3.25492	-1.63655	-0.201555	PLEKHF1
8003875	0.159	0.00366	-3.09835	-2.02013	-0.201577	SPNS2
8074388	0.0932	0.00161	-3.39749	-1.27844	-0.201639	SLC25A1
7974697	0.0927	0.00158	-3.4036	-1.26292	-0.202178	DAAM1
8114443	0.203	0.00565	-2.93416	-2.41054	-0.202255	ETF1
8097474	0.557	0.0482	-2.04184	-4.27462	-0.202379	LIMD1-AS1
7996393	0.221	0.00666	-2.87106	-2.55713	-0.202407	CBFB
8153457	0.42	0.0246	-2.3402	-3.70517	-0.203677	EEF1D
8099633	0.371	0.0182	-2.46761	-3.44449	-0.203748	PPARGC1A
8097435	0.311	0.0124	-2.62699	-3.10474	-0.203755	C4orf33
7904018	0.153	0.00339	-3.12629	-1.95246	-0.203817	CTTNBP2NL
8059996	0.0745	0.00107	-3.54373	-0.90304	-0.204408	PER2
7970498	0.0302	0.000273	-4.01277	0.34801	-0.204508	LATS2
8101839	0.539	0.0449	-2.07456	-4.21511	-0.204623	EIF4E
8006325	0.308	0.012	-2.63813	-3.08044	-0.204658	SUZ12
7925954	0.196	0.00525	-2.96258	-2.34388	-0.204914	NET1
7942439	0.395	0.0209	-2.41125	-3.56104	-0.204947	RELT
7958749	0.0808	0.00124	-3.48928	-1.04373	-0.205	SH2B3
7980316	0.294	0.0108	-2.67947	-2.98969	-0.20515	TGFB3
8172088	0.033	0.000313	-3.96653	0.22188	-0.205458	BCOR
8068583	0.207	0.00584	-2.92154	-2.44002	-0.205458	KCNJ15
8004431	0.00767	3.92e-05	-4.65326	2.1429	-0.205576	POLR2A
7962760	0.329	0.0139	-2.57968	-3.20712	-0.20579	SENP1
8180310	0.216	0.00628	-2.89359	-2.505	-0.20599	DNAJB6
8028524	0.158	0.00359	-3.10558	-2.00266	-0.206512	ACTN4
7967624	0.157	0.00354	-3.11044	-1.9909	-0.206739	SLC15A4
8005576	0.0763	0.00113	-3.52321	-0.95618	-0.206772	MAPK7
8038993	0.203	0.00563	-2.93558	-2.40721	-0.206915	ZNF28
8161747	0.314	0.0126	-2.61829	-3.12366	-0.207065	ZFAND5
7926679	0.0205	0.000163	-4.18496	0.82236	-0.20762	KIAA1217
8130674	0.0364	0.000365	-3.91452	0.08066	-0.207843	PDE10A
8060030	0.158	0.00363	-3.1015	-2.01253	-0.207873	HDAC4
8153067	0.428	0.0255	-2.32569	-3.73421	-0.207924	MIR30D
7946815	0.0858	0.00136	-3.45683	-1.12706	-0.208156	PIK3C2A
8143697	0.0107	6.46e-05	-4.4904	1.67928	-0.208574	ZNF786
8154012	0.108	0.00195	-3.32927	-1.45079	-0.209013	KANK1
8039034	0.0831	0.0013	-3.4737	-1.08378	-0.209144	ZNF160
7991581	0.137	0.0028	-3.19772	-1.7779	-0.209299	CHSY1
8092418	0.185	0.0047	-3.00407	-2.24585	-0.209424	ABCC5
7965723	0.175	0.00425	-3.04236	-2.15468	-0.210256	PXK
8116910	0.0763	0.00113	-3.52395	-0.95429	-0.2104	HIVEP1
8119926	0.00965	5.5e-05	-4.54296	1.82844	-0.210607	TMEM63B
8065612	0.0141	9.66e-05	-4.35824	1.30631	-0.210642	NOL4L
7897449	0.166	0.00393	-3.07114	-2.0857	-0.210653	SPSB1
8090823	0.379	0.0191	-2.44753	-3.48622	-0.210748	SLCO2A1
8083092	0.233	0.00719	-2.84126	-2.62566	-0.210849	ZBTB38
8069565	0.289	0.0105	-2.69198	-2.96204	-0.210874	BTG3
8153065	0.428	0.0254	-2.32635	-3.73289	-0.210999	MIR30B
7931081	0.455	0.029	-2.27034	-3.84378	-0.211122	PLEKHA1
8068810	0.385	0.0197	-2.43543	-3.51126	-0.211229	SLC37A1
8017651	0.0728	0.00103	-3.55631	-0.87039	-0.211348	SMURF2
7922889	0.217	0.0064	-2.88649	-2.52146	-0.211615	IVNS1ABP
7956426	0.237	0.00757	-2.82124	-2.67146	-0.212245	INHBE
8073039	0.0147	0.000103	-4.33788	1.24911	-0.212343	GTPBP1
8032829	0.0745	0.00108	-3.54094	-0.91029	-0.212352	PLIN4
8036207	0.216	0.00636	-2.88915	-2.5153	-0.212537	NFKBID
8129193	0.152	0.00336	-3.12934	-1.94506	-0.212679	CEP85L
8031726	0.114	0.00213	-3.29757	-1.53026	-0.212696	ZNF304
8094169	0.0608	0.000755	-3.66479	-0.58663	-0.212897	CPEB2
8044161	0.0374	0.000383	-3.89805	0.03608	-0.213097	RGPD2
7922432	0.311	0.0123	-2.62817	-3.10216	-0.21356	RC3H1
8043465	0.26	0.00882	-2.76146	-2.80695	-0.213601	IGKC
8151401	0.145	0.00309	-3.16138	-1.86698	-0.213835	UBE2W
8044263	0.0975	0.00171	-3.37717	-1.32996	-0.214689	RANBP2
8098470	0.167	0.00397	-3.0679	-2.09348	-0.215811	WWC2
7898052	0.264	0.00908	-2.75028	-2.83208	-0.215823	PRAMEF20
8050658	0.0913	0.00152	-3.41767	-1.22711	-0.215856	ATAD2B
7923659	0.0124	8.03e-05	-4.41897	1.47731	-0.215877	PPP1R15B
8148263	0.257	0.00868	-2.7679	-2.79244	-0.216317	TRMT12
7994280	0.199	0.00544	-2.94899	-2.3758	-0.216672	IL4R
7948864	0.0804	0.00124	-3.49175	-1.03736	-0.216728	STX5
7924832	0.137	0.0028	-3.19731	-1.7789	-0.217003	WNT9A
8147040	0.0901	0.00149	-3.42466	-1.2093	-0.217044	ZBTB10
8142061	0.112	0.00206	-3.30948	-1.50046	-0.217047	PUS7
8016739	0.0285	0.000254	-4.03699	0.41429	-0.217259	TOB1
7924996	0.213	0.00613	-2.90304	-2.48307	-0.217464	C1orf198
8019796	0.366	0.0177	-2.48009	-3.41843	-0.217561	MAFG
8114468	0.492	0.0353	-2.18313	-4.01236	-0.217836	SNORD63
8079931	0.38	0.0192	-2.44504	-3.49138	-0.218089	SLC38A3
7918467	0.183	0.00456	-3.01603	-2.21744	-0.218105	LRIF1
8163185	0.462	0.0302	-2.25248	-3.87869	-0.218403	TXN
8068761	0.287	0.0104	-2.69751	-2.94979	-0.21858	ABCG1
8154153	0.0857	0.00136	-3.45837	-1.1231	-0.219367	CDC37L1
8149774	0.309	0.0122	-2.63372	-3.09006	-0.219729	LOXL2
8057045	0.176	0.00428	-3.03964	-2.16117	-0.219788	FKBP7
8001197	0.468	0.0317	-2.23119	-3.92007	-0.220076	NETO2
8163896	0.113	0.0021	-3.30155	-1.52031	-0.220775	STOM
8043187	0.0628	0.000819	-3.63626	-0.66164	-0.220787	MAT2A
7914270	0.38	0.0192	-2.44503	-3.4914	-0.220855	LAPTM5
7986675	0.152	0.00336	-3.13028	-1.94277	-0.221126	NIPA1
8165947	0.00327	1.39e-05	-4.9873	3.10479	-0.2213	WWC3
8013923	0.0185	0.000144	-4.22602	0.93648	-0.221318	GIT1
7993999	0.0749	0.00109	-3.5349	-0.92593	-0.222194	SMG1P3
8000222	0.0749	0.00109	-3.5349	-0.92593	-0.222194	SMG1P3
8115022	0.056	0.000673	-3.70441	-0.48203	-0.222249	CSNK1A1
7971692	0.0573	0.000698	-3.69201	-0.5148	-0.222284	INTS6
7927936	0.189	0.00495	-2.98441	-2.29239	-0.222308	DDX21
8043324	0.0523	0.000608	-3.73982	-0.38812	-0.222348	RGPD2
8053622	0.0523	0.000608	-3.73982	-0.38812	-0.222348	RGPD2
8081115	0.217	0.00641	-2.88569	-2.5233	-0.222439	ARL13B
8022803	0.327	0.0138	-2.58326	-3.19941	-0.222924	GAREM1
7952436	0.0925	0.00157	-3.40653	-1.25545	-0.223193	ESAM
8131091	0.0853	0.00134	-3.46242	-1.11274	-0.223234	TMEM184A
7909586	0.0367	0.000369	-3.91065	0.07019	-0.223712	PPP2R5A
8049471	0.239	0.00766	-2.81666	-2.68189	-0.22392	ACKR3
7899361	0.0617	0.000783	-3.65189	-0.62059	-0.224206	STX12
7909332	0.0608	0.000754	-3.66524	-0.58543	-0.224465	CD55
8025498	0.0718	0.001	-3.56572	-0.84595	-0.224664	SNORA70B
8129637	0.445	0.0274	-2.29462	-3.79594	-0.224914	VNN2
8005707	0.2	0.00551	-2.94394	-2.38764	-0.225233	MAP2K3
8035477	0.00359	1.56e-05	-4.94971	2.99593	-0.225955	ELL
7914042	0.0175	0.000132	-4.2543	1.01526	-0.22597	MAP3K6
8036936	0.346	0.0156	-2.53317	-3.30652	-0.22602	LOC100130713
8043630	0.199	0.0054	-2.95175	-2.36932	-0.22692	ARID5A
7942400	0.0159	0.000114	-4.30281	1.15083	-0.227007	P2RY2
8174076	0.401	0.0219	-2.38974	-3.60498	-0.227162	GLA
8159491	0.148	0.0032	-3.14757	-1.90068	-0.227688	C8G
7940259	0.187	0.00481	-2.99564	-2.26583	-0.227812	MS4A14
7971197	0.0147	0.000103	-4.33689	1.24635	-0.228354	ELF1
7918902	0.0612	0.000772	-3.65682	-0.6076	-0.228854	CD58
8006736	0.0793	0.00122	-3.49774	-1.02194	-0.229213	DUSP14
8040238	0.056	0.000673	-3.7045	-0.48178	-0.229219	HPCAL1
8070194	0.433	0.0261	-2.31474	-3.75603	-0.22945	RUNX1
7953765	0.248	0.00817	-2.79166	-2.73873	-0.229652	RIMKLB
7963235	0.0745	0.00108	-3.5408	-0.91066	-0.229702	CSRNP2
8057959	0.34	0.015	-2.54889	-3.27307	-0.230222	PGAP1
8146550	0.173	0.00418	-3.04864	-2.13965	-0.230455	SDCBP
8112182	0.21	0.006	-2.91147	-2.46347	-0.231735	MIER3
8166632	0.188	0.00487	-2.99042	-2.27819	-0.231804	GK
8145122	0.0349	0.000337	-3.94121	0.15304	-0.232053	SLC39A14
7932530	0.502	0.0369	-2.16366	-4.04931	-0.232195	PIP4K2A
7926531	0.0843	0.00132	-3.46788	-1.09871	-0.232368	ARL5B
8104378	0.012	7.54e-05	-4.43966	1.53571	-0.233013	PAPD7
8021542	0.108	0.00195	-3.32921	-1.45096	-0.233182	ZCCHC2
8166219	0.141	0.00296	-3.17686	-1.8291	-0.23323	SYAP1
8091485	0.0469	0.000523	-3.79161	-0.25009	-0.233425	SIAH2
8116835	0.42	0.0247	-2.33982	-3.70593	-0.233497	GCNT2
7999841	0.0124	7.92e-05	-4.42376	1.49082	-0.233676	SMG1
8017547	0.187	0.00479	-2.99725	-2.26202	-0.23401	ICAM2
8142554	0.446	0.0276	-2.29074	-3.80361	-0.234108	AASS
7943984	0.00617	3e-05	-4.7397	2.39053	-0.234769	ZBTB16
8133202	0.364	0.0175	-2.48413	-3.40996	-0.234788	TYW1
8056977	0.0891	0.00145	-3.43497	-1.18299	-0.234804	NFE2L2
7985809	0.0947	0.00165	-3.38982	-1.2979	-0.234866	ABHD2
8138504	0.535	0.0445	-2.07841	-4.20806	-0.23569	RAPGEF5
7996361	0.313	0.0126	-2.62025	-3.11939	-0.235692	CES3
8108099	0.0379	0.000398	-3.88509	0.00107	-0.2357	SEC24A
8013908	0.00587	2.84e-05	-4.75768	2.44214	-0.236504	NUFIP2
8028254	0.146	0.00314	-3.15445	-1.8839	-0.236601	ZNF793
8098103	0.0925	0.00157	-3.40603	-1.25673	-0.236604	FNIP2
7925565	0.00965	5.5e-05	-4.54285	1.82814	-0.237316	HNRNPU
8112668	0.392	0.0205	-2.41785	-3.54748	-0.237565	GCNT4
7979085	0.0811	0.00125	-3.48676	-1.0502	-0.237671	PYGL
7970949	0.371	0.0182	-2.46866	-3.4423	-0.238027	MAB21L1
7918911	0.192	0.00506	-2.97637	-2.31139	-0.238357	NAP1L4
7920506	0.0137	9.27e-05	-4.37176	1.34431	-0.23846	SHE
8078527	0.52	0.041	-2.11601	-4.13866	-0.238737	MIR128-2
7995787	0.325	0.0136	-2.58694	-3.1915	-0.239062	MT1M
7925161	0.109	0.00196	-3.32704	-1.45641	-0.240434	IRF2BP2
8017634	0.0329	0.000311	-3.96842	0.22701	-0.24059	DDX5
8031047	0.234	0.00734	-2.83319	-2.64414	-0.240796	MYADM
7969256	0.256	0.00861	-2.77108	-2.78526	-0.241128	TPTE2P3
8067743	0.0283	0.000251	-4.04054	0.42403	-0.241231	ZBTB46
7912496	0.137	0.00281	-3.19629	-1.78143	-0.24218	MTHFR
8155770	0.0573	0.000699	-3.69147	-0.51624	-0.24233	SMC5
8035445	0.432	0.026	-2.31657	-3.75238	-0.242441	JUND
8088680	0.0831	0.0013	-3.4745	-1.08172	-0.242771	EOGT
8029907	0.325	0.0136	-2.58709	-3.19118	-0.243169	C5AR1
7981020	0.235	0.00742	-2.8291	-2.65349	-0.243466	ASB2
7900488	0.395	0.021	-2.40849	-3.56667	-0.243661	MIR30E
8092849	0.0331	0.000316	-3.96325	0.21294	-0.244398	ATP13A3
8106516	0.0925	0.00158	-3.40513	-1.25901	-0.244679	JMY
7990033	0.36	0.0171	-2.49518	-3.38678	-0.24525	TLE3
8020468	0.308	0.012	-2.64026	-3.0758	-0.245274	RBBP8
7982326	0.0147	0.000103	-4.33626	1.24457	-0.245339	KLF13
7976976	0.016	0.000117	-4.29411	1.1265	-0.245453	TECPR2
7967287	0.00965	5.51e-05	-4.54244	1.82699	-0.24677	ZCCHC8
7897877	0.109	0.00197	-3.325	-1.46152	-0.247155	TNFRSF1B
8048733	0.0718	0.001	-3.56591	-0.84545	-0.247686	ACSL3
7996772	0.482	0.0337	-2.20345	-3.97352	-0.248096	SLC7A6OS
8030866	0.301	0.0113	-2.66182	-3.02854	-0.248168	FPR3
7971177	0.0231	0.000192	-4.13097	0.67287	-0.24819	FOXO1
8074473	0.207	0.00583	-2.92203	-2.43887	-0.248308	CLDN5
7898278	0.00124	4.2e-06	-5.36895	4.2161	-0.248456	SPEN
7997414	0.00649	3.18e-05	-4.72101	2.33689	-0.248613	GAN
8114010	0.189	0.00493	-2.98599	-2.28867	-0.249778	IRF1
8138592	0.0787	0.0012	-3.50258	-1.00946	-0.24991	TRA2A
8018038	0.0132	8.83e-05	-4.3881	1.3903	-0.250926	ABCA5
7933723	0.0359	0.000355	-3.92326	0.10436	-0.25118	IPMK
7903393	0.0416	0.000449	-3.84397	-0.10972	-0.251398	S1PR1
8051573	0.381	0.0193	-2.44346	-3.49466	-0.251782	CDC42EP3
8013515	0.281	0.00998	-2.71256	-2.91637	-0.251988	C17orf51
8027604	0.0175	0.000132	-4.25526	1.01796	-0.25217	KIAA0355
8034694	0.32	0.0131	-2.60322	-3.15634	-0.252674	MIR24-2
8151559	0.267	0.00926	-2.7425	-2.84953	-0.253558	SLC10A5
8038192	0.0728	0.00103	-3.55614	-0.87083	-0.254015	FUT1
8002854	0.0122	7.79e-05	-4.42916	1.50607	-0.254087	BCAR1
8138741	0.355	0.0166	-2.50584	-3.36434	-0.254108	HOXA6
7978595	0.00499	2.32e-05	-4.82309	2.63032	-0.254153	BAZ1A
8107909	0.131	0.00259	-3.22639	-1.70723	-0.254381	SLC22A4
8103226	0.21	0.00604	-2.90892	-2.46939	-0.254937	TMEM154
7925561	0.183	0.00456	-3.01578	-2.21805	-0.255247	COX20
7902512	0.395	0.021	-2.40884	-3.56597	-0.25531	DNAJB4
7909214	0.386	0.0199	-2.43172	-3.51891	-0.25598	RASSF5
8122807	0.105	0.00186	-3.34591	-1.40893	-0.256434	AKAP12
8062852	0.0133	8.88e-05	-4.38597	1.38429	-0.256529	PKIG
8080714	0.306	0.0116	-2.65149	-3.05121	-0.2571	FLNB
8117330	0.0384	0.000403	-3.88049	-0.01135	-0.257509	HIST1H3A
7985620	0.11	0.00201	-3.31783	-1.47951	-0.257512	ALPK3
8010949	0.0313	0.000288	-3.99479	0.29891	-0.257647	GLOD4
7901054	0.257	0.00866	-2.76869	-2.79065	-0.258308	TCTEX1D4
8081069	0.165	0.00383	-3.08079	-2.06249	-0.258342	ZNF654
8137280	0.18	0.00444	-3.02577	-2.19426	-0.258376	NOS3
8160637	0.108	0.00195	-3.3293	-1.45072	-0.259675	B4GALT1
8043995	0.0393	0.000418	-3.8681	-0.04475	-0.2603	IL1R1
7933872	0.0575	0.000702	-3.68972	-0.52086	-0.260404	EGR2
8071357	0.228	0.00701	-2.85155	-2.60204	-0.261413	LOC440792
8162132	0.361	0.0172	-2.49081	-3.39596	-0.261606	C9orf153
8150978	0.0763	0.00115	-3.51854	-0.96826	-0.262104	CA8
8083324	0.0103	6.14e-05	-4.50716	1.7268	-0.262395	TSC22D2
8083094	0.0447	0.000493	-3.81199	-0.19555	-0.263057	RASA2
8030964	0.308	0.012	-2.6386	-3.07942	-0.263059	ERVFRD-2
8054135	0.0672	0.0009	-3.60357	-0.74725	-0.263306	MGAT4A
7936856	0.187	0.00479	-2.99673	-2.26326	-0.264186	CHST15
8044333	0.0349	0.000341	-3.9369	0.14135	-0.264344	LIMS4
8054519	0.0349	0.000341	-3.9369	0.14135	-0.264344	LIMS4
8167965	0.0889	0.00144	-3.43815	-1.17485	-0.264507	MSN
8170863	0.0182	0.000142	-4.23163	0.95209	-0.264595	SNORA70
7956878	0.0488	0.000553	-3.77226	-0.30175	-0.264634	IRAK3
8052798	0.0783	0.00119	-3.50505	-1.00309	-0.264833	AAK1
8115814	0.182	0.00452	-3.01856	-2.21143	-0.265118	SH3PXD2B
8141311	0.124	0.00239	-3.25523	-1.63577	-0.266195	FAM200A
8079107	0.313	0.0125	-2.62195	-3.1157	-0.266663	KLHL40
8058905	0.532	0.0432	-2.09174	-4.18356	-0.266981	CXCR1
7930162	0.0612	0.000769	-3.65846	-0.6033	-0.268104	WBP1L
8113981	0.0688	0.00094	-3.58816	-0.78751	-0.268126	P4HA2
7934278	0.156	0.0035	-3.11509	-1.97963	-0.26834	P4HA1
8118310	0.165	0.00387	-3.0773	-2.07089	-0.26916	HSPA1A
8018793	0.0483	0.000544	-3.77813	-0.28609	-0.269236	JMJD6
8026631	0.183	0.00459	-3.01355	-2.22333	-0.269706	F2RL3
8177222	0.203	0.00563	-2.93555	-2.40727	-0.27006	CD24
8157216	0.0316	0.000291	-3.99043	0.28699	-0.27019	UGCG
8101723	0.175	0.00424	-3.04262	-2.15405	-0.270324	NAP1L5
7939492	0.0672	0.000897	-3.60442	-0.74504	-0.27047	C11orf96
8102050	0.0173	0.00013	-4.25997	1.03108	-0.270635	SLC9B2
8008700	0.222	0.00673	-2.86723	-2.56596	-0.270703	FLJ11710
7923991	0.0274	0.000235	-4.06232	0.48379	-0.270823	PLXNA2
7934993	0.248	0.00813	-2.79362	-2.73428	-0.2717	NUDT9P1
8156935	0.332	0.0143	-2.56796	-3.23229	-0.271737	ZNF189
7999608	0.166	0.00389	-3.07541	-2.07544	-0.272313	RRN3
8136918	0.0055	2.63e-05	-4.78252	2.51355	-0.272352	ZYX
7973067	0.317	0.0128	-2.61206	-3.13718	-0.272631	PNP
7984952	0.0276	0.000241	-4.05428	0.46172	-0.273203	C15orf39
8149264	0.00337	1.46e-05	-4.9723	3.06133	-0.27339	PPP1R3B
7961371	0.013	8.57e-05	-4.39772	1.4174	-0.274037	DUSP16
8175039	0.234	0.00736	-2.83245	-2.64583	-0.274042	ELF4
8038163	0.057	0.00069	-3.69606	-0.50412	-0.274201	RASIP1
8180318	0.424	0.025	-2.33355	-3.71849	-0.274457	TGIF1
7973306	0.323	0.0134	-2.59524	-3.17359	-0.274547	ABHD4
8045688	0.262	0.00891	-2.75756	-2.81571	-0.27496	TNFAIP6
8099302	0.525	0.042	-2.10447	-4.16005	-0.27498	MIR95
8179322	0.146	0.00314	-3.15485	-1.88295	-0.27523	HSPA1A
8021984	0.0406	0.000434	-3.85544	-0.07884	-0.275871	YES1
8159732	0.114	0.00215	-3.29345	-1.54058	-0.275998	EHMT1-IT1
7936242	0.0523	0.000603	-3.74245	-0.38113	-0.276179	ITPRIP
7962349	0.186	0.00477	-2.99854	-2.25896	-0.276534	GXYLT1
8143663	0.158	0.00362	-3.10169	-2.01205	-0.276739	EZH2
8032365	0.00861	4.58e-05	-4.60273	1.99862	-0.277118	KLF16
8062603	0.00104	3.25e-06	-5.45055	4.45475	-0.278195	TOP1
8064868	0.317	0.0128	-2.61204	-3.13723	-0.278408	GPCPD1
8087907	0.0617	0.00079	-3.64889	-0.62845	-0.278676	SEMA3G
8004508	0.122	0.00235	-3.26154	-1.62011	-0.278932	SNORA67
7905789	0.237	0.00756	-2.82173	-2.67033	-0.279503	IL6R
7915229	0.234	0.00734	-2.83348	-2.64348	-0.280215	HEYL
8016194	0.03	0.000269	-4.01702	0.35963	-0.280751	MAP3K14-AS1
7922689	0.154	0.00345	-3.12034	-1.9669	-0.281217	GLUL
8129677	0.313	0.0125	-2.62116	-3.11742	-0.281244	SGK1
8119080	0.0718	0.001	-3.56489	-0.8481	-0.282191	SRSF3
8021653	0.0147	0.000104	-4.33509	1.24131	-0.282766	SERPINB8
7999478	0.00965	5.44e-05	-4.54636	1.83812	-0.282882	TXNDC11
7995838	0.215	0.00624	-2.89633	-2.49865	-0.282905	MT1X
8054997	0.0561	0.000675	-3.70337	-0.48477	-0.283581	MAP3K2
8153021	0.000971	2.98e-06	-5.47887	4.53763	-0.284079	ST3GAL1
8097461	0.0324	0.000301	-3.9797	0.25774	-0.285297	NOCT
8091658	0.0111	6.95e-05	-4.46661	1.61193	-0.285495	CCNL1
7982004	0.207	0.00581	-2.92383	-2.43466	-0.286362	SNORD116-28
8137781	0.0674	0.000909	-3.5998	-0.7571	-0.287949	LOC100128653
8152617	0.336	0.0147	-2.55775	-3.25414	-0.288287	HAS2
8021470	0.0351	0.000344	-3.93402	0.13352	-0.288603	PMAIP1
7968351	0.306	0.0117	-2.6499	-3.05471	-0.289772	MEDAG
8011193	0.132	0.00262	-3.22158	-1.7191	-0.289879	MIR22
8068202	0.0202	0.00016	-4.19231	0.84276	-0.290005	EVA1C
8052010	0.121	0.00232	-3.26633	-1.60818	-0.290113	CALM2
8149289	0.0421	0.000455	-3.83891	-0.12331	-0.290231	SOX7
8005839	0.0913	0.00153	-3.41691	-1.22904	-0.290586	TMEM97
8154254	0.0227	0.000185	-4.1424	0.70448	-0.29124	RIC1
7904742	0.00821	4.24e-05	-4.62754	2.06942	-0.291314	LIX1L
8180319	0.186	0.00475	-3.00013	-2.25521	-0.292632	TGIF1
8012349	0.104	0.00184	-3.35055	-1.39723	-0.293702	PER1
8162827	0.00968	5.61e-05	-4.53658	1.81033	-0.294177	ALG2
7906757	0.347	0.0156	-2.53183	-3.30937	-0.295414	FCGR2A
7973918	0.165	0.00387	-3.07747	-2.07047	-0.296379	FAM177A1
8146579	0.000609	1.65e-06	-5.6668	5.08811	-0.296503	CHD7
7979269	0.0697	0.000958	-3.58145	-0.80498	-0.296677	GCH1
7928291	0.00654	3.22e-05	-4.71658	2.32418	-0.297048	CHST3
8141241	0.216	0.0063	-2.89234	-2.50791	-0.297053	SMURF1
7951036	0.127	0.00247	-3.24281	-1.66659	-0.297205	SNORD5
8127145	0.0708	0.000982	-3.57298	-0.82706	-0.298309	ELOVL5
8095736	0.534	0.0443	-2.08053	-4.20417	-0.29852	AREG
8036902	0.0745	0.00108	-3.53925	-0.91466	-0.29967	SERTAD1
8149733	0.0763	0.00115	-3.51769	-0.97045	-0.299893	TNFRSF10B
8143957	0.0276	0.000238	-4.05853	0.47338	-0.300755	RHEB
7926983	0.0221	0.000179	-4.15338	0.73485	-0.300766	CREM
8047596	0.0792	0.00121	-3.49927	-1.018	-0.301425	NBEAL1
8098581	0.015	0.000107	-4.32559	1.21467	-0.301563	SNX25
7970194	0.000145	2.61e-07	-6.25108	6.799	-0.302873	MCF2L
7999496	0.0173	0.00013	-4.26124	1.03464	-0.303295	ZC3H7A
7902425	0.00283	1.16e-05	-5.04617	3.27551	-0.305124	ST6GALNAC3
8171837	0.00145	5.07e-06	-5.30966	4.04287	-0.305761	KLHL15
8104901	0.411	0.0234	-2.36228	-3.6607	-0.305935	IL7R
8018379	0.00965	5.4e-05	-4.54867	1.84468	-0.30794	CASKIN2
8123678	0.0925	0.00156	-3.40987	-1.24696	-0.308546	PXDC1
8168345	0.306	0.0117	-2.64832	-3.05815	-0.308556	ACRC
8025601	0.00472	2.13e-05	-4.85089	2.71045	-0.311415	ICAM1
7942596	0.198	0.00534	-2.95547	-2.36057	-0.312165	SERPINH1
8118322	0.141	0.00296	-3.17697	-1.82883	-0.313873	SNORD52
8119067	0.0739	0.00105	-3.5496	-0.88782	-0.313914	KCTD20
7961865	0.112	0.00204	-3.31263	-1.49256	-0.314102	LYRM5
7980338	0.0321	0.000297	-3.98429	0.27026	-0.315641	IRF2BPL
7976412	0.0949	0.00165	-3.3881	-1.30227	-0.316252	LINC00521
8121489	0.0352	0.000347	-3.93185	0.12764	-0.316322	AMD1
8129562	0.558	0.0491	-2.03307	-4.29045	-0.316655	CTGF
8118314	0.0708	0.000978	-3.5742	-0.82387	-0.317246	HSPA1B
8081386	0.00472	2.15e-05	-4.84779	2.7015	-0.317318	NFKBIZ
8178086	0.0682	0.000926	-3.5933	-0.7741	-0.317779	HSPA1B
8179324	0.0682	0.000926	-3.5933	-0.7741	-0.317779	HSPA1B
7966052	0.0196	0.000154	-4.20374	0.8745	-0.317846	CRY1
7977571	0.0462	0.000514	-3.79747	-0.2344	-0.317913	OSGEP
7925876	0.0103	6.18e-05	-4.5049	1.72038	-0.318191	PFKP
8047217	0.00184	6.63e-06	-5.2238	3.79233	-0.318793	COQ10B
7921873	0.448	0.0278	-2.28793	-3.80916	-0.31975	FCGR3B
7952205	0.216	0.00633	-2.89047	-2.51225	-0.321629	MCAM
7912622	0.235	0.00743	-2.82888	-2.65401	-0.322339	LRRC38
8004497	0.0144	9.94e-05	-4.34897	1.28026	-0.322407	EIF4A1
8072817	0.00748	3.77e-05	-4.66543	2.1777	-0.322421	CDC42EP1
7913558	0.0132	8.78e-05	-4.38982	1.39515	-0.322712	LUZP1
8151074	0.0276	0.000239	-4.05763	0.47092	-0.322737	PDE7A
8136388	0.32	0.0131	-2.60363	-3.15544	-0.32283	TMEM140
7978553	0.0255	0.000214	-4.09371	0.5701	-0.323605	SPTSSA
8090469	0.056	0.000669	-3.70654	-0.47639	-0.32417	GATA2
8163936	0.0349	0.000337	-3.94126	0.15316	-0.32433	LHX6
8161884	0.237	0.00758	-2.82104	-2.67192	-0.324709	PRUNE2
8154962	0.0109	6.75e-05	-4.47587	1.63812	-0.325322	DNAJB5
7942679	0.0617	0.000786	-3.65071	-0.62369	-0.325451	ACER3
8064790	0.114	0.00212	-3.29838	-1.52824	-0.325794	RASSF2
8096875	0.0328	0.000309	-3.97059	0.23292	-0.326207	ENPEP
8040473	0.114	0.00211	-3.29963	-1.52513	-0.327435	RHOB
8091637	0.0895	0.00147	-3.43083	-1.19354	-0.328455	SLC33A1
8141625	0.0272	0.000232	-4.0667	0.49582	-0.328637	EPHB4
8084478	0.033	0.000315	-3.96474	0.217	-0.329583	FAM131A
7920839	0.00567	2.73e-05	-4.77067	2.47949	-0.329613	RIT1
8180286	0.0337	0.000323	-3.95614	0.1936	-0.330092	RBM8A
8089785	0.199	0.00544	-2.94905	-2.37564	-0.330715	POPDC2
8137526	0.0541	0.000638	-3.72292	-0.43299	-0.33092	INSIG1
7943760	0.000858	2.6e-06	-5.52126	4.66174	-0.33161	SIK2
7920238	0.16	0.00367	-3.09697	-2.02347	-0.331821	S100A12
8088820	0.00397	1.74e-05	-4.91522	2.89617	-0.331931	RYBP
7914950	0.265	0.00917	-2.7462	-2.84123	-0.332246	CSF3R
8014233	0.016	0.000117	-4.2951	1.12926	-0.333164	SLFN11
8105136	0.142	0.00299	-3.17332	-1.83779	-0.333294	ZNF131
7974771	0.116	0.00221	-3.28386	-1.56452	-0.333527	PCNX4
7930413	0.0745	0.00108	-3.54032	-0.91188	-0.33523	DUSP5
8036591	0.147	0.00317	-3.15117	-1.89191	-0.335315	LGALS4
7922773	0.0708	0.000977	-3.57477	-0.8224	-0.33582	NCF2
7983910	0.48	0.0333	-2.20861	-3.96362	-0.336027	AQP9
8004867	0.0109	6.72e-05	-4.47725	1.64205	-0.336409	NDEL1
8062034	0.137	0.00278	-3.2	-1.7723	-0.33665	TP53INP2
8180316	0.157	0.00355	-3.10952	-1.99313	-0.337729	TGIF1
8180317	0.141	0.00293	-3.18003	-1.82135	-0.337783	TGIF1
7905606	0.0181	0.000139	-4.23853	0.97129	-0.338625	NPR1
7966690	0.197	0.00529	-2.95935	-2.35146	-0.339296	TBX3
7952249	0.000681	1.88e-06	-5.62485	4.96519	-0.343183	USP2
7996027	0.346	0.0155	-2.53446	-3.30377	-0.34351	CX3CL1
7906973	0.263	0.00901	-2.75304	-2.82588	-0.343674	LRRC52
7953211	0.28	0.00992	-2.71501	-2.91093	-0.344233	TIGAR
8002660	0.00327	1.41e-05	-4.98367	3.09427	-0.34426	TXNL4B
7923378	0.256	0.00857	-2.77289	-2.78119	-0.344847	CSRP1
7902227	0.0363	0.000363	-3.9165	0.08602	-0.345284	GADD45A
8100971	0.395	0.0208	-2.41139	-3.56073	-0.347065	PPBP
7970763	0.00654	3.26e-05	-4.71288	2.31358	-0.348536	FLT1
8096116	0.0451	0.000498	-3.80792	-0.20643	-0.34881	GPAT3
7946041	0.355	0.0166	-2.50764	-3.36054	-0.34964	HBD
7957140	0.0745	0.00108	-3.53925	-0.91467	-0.350092	LGR5
7965652	0.00113	3.68e-06	-5.41158	4.34073	-0.351004	CDK17
8165217	0.000742	2.16e-06	-5.5803	4.83467	-0.353364	NOTCH1
8041172	0.24	0.00775	-2.81223	-2.69199	-0.354419	FAM179A
8153002	5.03e-05	6.35e-08	-6.70086	8.10708	-0.354585	NDRG1
8037614	0.072	0.00101	-3.56315	-0.85262	-0.35481	GPR4
8051547	0.00437	1.93e-05	-4.882	2.80022	-0.356521	PRKD3
7897460	0.0671	0.000892	-3.60638	-0.7399	-0.357059	SLC25A33
8034837	0.0535	0.000629	-3.72807	-0.41931	-0.358479	DNAJB1
7991395	0.0013	4.44e-06	-5.35137	4.16473	-0.358511	GABARAPL3
7896759	0.00175	6.25e-06	-5.24275	3.8476	-0.360343	LINC01128
7997533	0.116	0.00219	-3.28637	-1.55825	-0.360347	OSGIN1
7931754	0.0914	0.00153	-3.41557	-1.23246	-0.360452	IDI1
7913907	0.512	0.0391	-2.13702	-4.09946	-0.360526	TRIM63
7997642	0.089	0.00145	-3.43623	-1.17975	-0.361564	CRISPLD2
7975787	0.0372	0.000378	-3.90234	0.04769	-0.361582	JDP2
7912157	0.016	0.000118	-4.29289	1.12308	-0.363915	ERRFI1
8010841	0.0378	0.000391	-3.89131	0.01789	-0.36483	FN3K
7984217	0.0548	0.000648	-3.7175	-0.44735	-0.365208	PLEKHO2
7912646	0.137	0.0028	-3.19758	-1.77826	-0.365262	CASP9
8069348	0.000245	5.3e-07	-6.0256	6.13956	-0.366479	PCNT
8044375	0.0145	0.000101	-4.34532	1.27	-0.367933	BCL2L11
8007084	3.49e-05	3.46e-08	-6.89533	8.66834	-0.368043	RARA
8127534	0.0739	0.00105	-3.54874	-0.89005	-0.368523	MB21D1
7993259	0.00198	7.32e-06	-5.19228	3.70048	-0.36962	TXNDC11
8125919	0.0358	0.000353	-3.92531	0.1099	-0.371512	LOC285847
8084206	0.0181	0.000138	-4.24038	0.97645	-0.372308	B3GNT5
8164200	0.306	0.0117	-2.64783	-3.05923	-0.373534	ANGPTL2
8004255	0.189	0.00492	-2.98668	-2.28704	-0.374239	BCL6B
8009353	0.00731	3.66e-05	-4.67494	2.20492	-0.374408	PITPNC1
8020814	0.0432	0.000468	-3.82935	-0.14899	-0.375007	RNF138
8113220	0.0407	0.000436	-3.85375	-0.0834	-0.375024	ELL2
8019243	0.015	0.000107	-4.3243	1.21105	-0.375764	PPP1R27
7995806	0.0303	0.000275	-4.01018	0.34094	-0.37649	MT1A
8173135	0.542	0.0456	-2.06752	-4.22799	-0.376535	ALAS2
8131263	0.0328	0.000309	-3.97123	0.23467	-0.376634	SNORD13P2
7979179	0.0181	0.000139	-4.23791	0.96959	-0.378803	ERO1A
8171136	0.0627	0.00081	-3.64027	-0.65112	-0.378971	P2RY8
8177026	0.0627	0.00081	-3.64027	-0.65112	-0.378971	P2RY8
7913655	0.431	0.0259	-2.31876	-3.74804	-0.379873	ID3
7963786	0.0196	0.000154	-4.20315	0.87287	-0.379928	ITGA5
8180309	0.00185	6.73e-06	-5.21907	3.77855	-0.381276	ST6GALNAC3
8053668	0.000311	7.19e-07	-5.92933	5.85756	-0.38207	EIF2AK3
8094599	0.00123	4.12e-06	-5.37519	4.23434	-0.382303	KLF3-AS1
8113491	0.137	0.00283	-3.19338	-1.78857	-0.382864	STARD4
8076493	0.0371	0.000376	-3.90423	0.0528	-0.384455	ATP5L2
7970864	0.195	0.0052	-2.96591	-2.33603	-0.386959	HSPH1
7934411	0.00862	4.61e-05	-4.60015	1.99125	-0.388795	USP54
7927964	0.00277	1.12e-05	-5.05684	3.30649	-0.38984	SRGN
8054377	0.137	0.00276	-3.2021	-1.76713	-0.390313	FHL2
8063382	0.153	0.00338	-3.1281	-1.94806	-0.390425	SNAI1
7948088	0.108	0.00194	-3.33087	-1.44677	-0.390856	SLC25A33
8008922	3.89e-05	3.99e-08	-6.84933	8.53585	-0.391538	PPM1D
8073816	0.00117	3.88e-06	-5.39457	4.291	-0.391618	MIRLET7BHG
8011018	5.11e-05	6.6e-08	-6.68852	8.07135	-0.392238	CRK
8131096	0.0124	7.99e-05	-4.42067	1.48212	-0.393243	ELFN1
8028652	0.0721	0.00101	-3.56169	-0.85642	-0.393586	ZFP36
8023598	0.0378	0.000395	-3.88746	0.00748	-0.394569	RNF152
8087624	0.00849	4.46e-05	-4.61099	2.02218	-0.395222	HYAL2
7906377	0.0913	0.00152	-3.41716	-1.22839	-0.395377	MNDA
7909610	0.0228	0.000189	-4.13667	0.68862	-0.396594	ATF3
8122756	0.016	0.000117	-4.29563	1.13073	-0.39706	PLEKHG1
8164269	0.0097	5.68e-05	-4.53237	1.79836	-0.397924	ENG
7982333	0.0361	0.000359	-3.91987	0.09515	-0.400251	LOC105370939
8018937	0.00823	4.29e-05	-4.62377	2.05866	-0.401309	USP36
8142977	0.0811	0.00125	-3.48677	-1.05017	-0.401722	MIR29B1
7938396	0.418	0.0242	-2.34724	-3.69102	-0.401766	AMPD3
7999468	0.0374	0.000382	-3.89843	0.03713	-0.402263	LITAF
7912994	0.0927	0.0016	-3.40085	-1.26989	-0.402341	IFFO2
8105040	0.00472	2.15e-05	-4.84649	2.69777	-0.402934	OSMR
8021484	0.233	0.00726	-2.83772	-2.63378	-0.407188	CDH20
8079896	1.42e-05	7.25e-09	-7.39955	10.1076	-0.407336	SEMA3F
8148476	0.000119	2e-07	-6.33567	7.04586	-0.40791	DENND3
7912706	0.00654	3.25e-05	-4.71342	2.31513	-0.409118	EPHA2
8151592	0.214	0.0062	-2.89844	-2.49375	-0.41118	CA1
8037166	0.00141	4.88e-06	-5.32183	4.07842	-0.412821	ERF
7950983	0.0349	0.00034	-3.93852	0.14574	-0.413636	CHORDC1
8010901	0.164	0.0038	-3.08359	-2.05573	-0.414849	DOC2B
7954090	0.0521	0.000598	-3.74523	-0.37372	-0.415723	EMP1
8154765	0.00312	1.3e-05	-5.00797	3.16469	-0.416195	DNAJA1
[truncated: 166 more rows]

## Sheet: DEGs in GSE109657
Symbol	logFC	AveExpr	t	P.Value	adj.P.Val	B
NMRK2	2.19154	8.71484	11.9442	3.20443e-12	8.45649e-08	14.7461
CA14	1.17701	6.38794	4.85368	4.63151e-05	0.0518594	1.95178
SF3A3	0.867986	8.34692	6.35397	8.7909e-07	0.00773306	5.3036
CD79A	0.664934	6.2299	4.91387	3.94285e-05	0.0495485	2.08977
ZCCHC9	0.635609	6.33292	6.01566	2.12013e-06	0.0134459	4.56918
MXRA5	0.618645	6.25804	3.39574	0.00215437	0.208714	-1.3557
MYLK4	0.605912	7.73626	4.48245	0.000124919	0.0716654	1.09899
LINC01921	0.580654	4.89711	3.91243	0.000565907	0.136957	-0.203953
G0S2	0.546045	9.03522	4.15635	0.000297388	0.101137	0.351244
SNORD115-31	0.545843	3.92019	2.61601	0.0144537	0.33168	-2.97524
MIR4640	0.526949	4.66608	3.72116	0.000932761	0.170255	-0.63502
COL4A1	0.516135	6.43329	4.59456	9.2602e-05	0.0638227	1.35665
LAMB1	0.507856	6.05474	4.22671	0.000246772	0.0932453	0.512195
GADL1	0.495256	7.38819	4.82303	5.0272e-05	0.0518594	1.88146
LOC105373116	0.491929	5.52045	2.41662	0.0227778	0.367344	-3.35442
RPL13P5	0.484007	6.31248	4.68467	7.27822e-05	0.0619588	1.56373
NETO2	0.477013	5.74122	4.27627	0.000216334	0.0892039	0.625729
DSTNP2	0.475354	5.16403	3.33792	0.00249457	0.219001	-1.48161
MIR4747	0.470155	4.19478	2.55707	0.0165601	0.344654	-3.08912
C1QTNF9	0.464275	3.69488	4.28178	0.00021319	0.0892039	0.638351
SLC25A30	0.463576	8.78345	4.0545	0.000389311	0.113888	0.118835
BCAS2	0.444413	8.3462	3.57041	0.00137783	0.184673	-0.971189
TMEM70	0.442742	6.45339	3.07879	0.00476719	0.250637	-2.03605
FBP2	0.439762	10.5211	3.88595	0.000606609	0.139823	-0.263884
SGK1	0.438829	5.93068	3.31727	0.00262824	0.219628	-1.52641
COL1A1	0.430052	5.63516	2.63295	0.013896	0.32978	-2.94224
FGF6	0.428088	5.65219	4.25251	0.000230429	0.0921366	0.571295
SLC38A1	0.413635	7.79907	2.68393	0.0123369	0.32035	-2.84226
PRND	0.412291	5.17552	3.90444	0.000577893	0.136957	-0.222038
FARP1	0.407745	6.12511	4.40636	0.000153021	0.0772463	0.924204
PKM	0.405325	10.601	4.93563	3.72e-05	0.0490854	2.13962
KDR	0.397988	6.28019	3.67651	0.00104742	0.170255	-0.734967
IQGAP3	0.397064	3.99623	5.14883	2.10434e-05	0.0370223	2.62683
LOC107984678	0.389802	4.29234	2.76992	0.0100719	0.304631	-2.6713
MIR601	0.389483	3.72023	3.13089	0.00419071	0.242836	-1.92598
LINC02506	0.385609	5.70141	3.36884	0.00230664	0.214058	-1.41436
SNORD115-25	0.383432	4.46866	2.09643	0.0456541	0.444292	-3.92357
BTNL3	0.373699	3.76064	4.01691	0.000429902	0.119422	0.0332466
CIP2A	0.373387	4.30044	2.08217	0.0470389	0.448143	-3.94767
MIR4470	0.372266	4.2265	2.16385	0.03959	0.42802	-3.80818
LINC00960	0.371504	4.02229	2.3879	0.0242881	0.374037	-3.40755
LOC101928278	0.370931	5.042	2.83167	0.00869333	0.298063	-2.54685
CKMT2	0.369338	10.0317	4.37755	0.000165231	0.0807492	0.858047
LOC105369382	0.367075	5.71514	2.67836	0.0124987	0.321167	-2.85322
SPACA5	0.36409	3.64579	2.43902	0.0216601	0.365879	-3.3127
KRT35	0.363935	3.80102	4.23312	0.000242604	0.0932453	0.526886
OSBPL7	0.36263	6.21947	4.60313	9.05056e-05	0.0638227	1.37634
SNORD115-27	0.361686	4.74956	2.22351	0.0348366	0.417652	-3.704
MIR4442	0.360197	7.69994	3.70861	0.0009637	0.170255	-0.663154
CARNS1	0.355253	7.10023	4.29218	0.000207373	0.0882674	0.662208
LOC100287834	0.353658	9.86603	2.32147	0.0281389	0.393141	-3.52896
MIR200C	0.352228	2.64391	2.65244	0.0132793	0.323125	-2.90413
COL6A3	0.351563	7.72622	2.74947	0.0105721	0.309596	-2.71221
XXYLT1-AS1	0.351045	3.70142	3.3153	0.00264134	0.219628	-1.53067
MIR4487	0.34706	4.00029	2.23732	0.0338123	0.413488	-3.67962
MZT2B	0.346837	5.35789	2.84214	0.00847807	0.296498	-2.52562
COL4A2	0.346135	6.39759	4.31457	0.000195389	0.0869816	0.713535
NPR3	0.342946	5.48453	2.21056	0.0358222	0.419227	-3.72677
SIPA1L2	0.342894	6.28043	4.80287	5.30581e-05	0.0518594	1.83518
FAM96A	0.342641	7.02914	3.17813	0.00372633	0.238696	-1.82555
FAM21EP	0.341895	5.51866	3.43006	0.00197413	0.203564	-1.28061
DENND2C	0.34175	8.97972	2.64725	0.013441	0.325251	-2.9143
LOC105373873	0.340555	5.05405	3.66501	0.00107911	0.172592	-0.760654
CNGA2	0.338329	4.08588	3.28758	0.00283254	0.222954	-1.59062
MIR378I	0.338198	5.8836	3.36313	0.00234031	0.215946	-1.42681
LOC101928661	0.337968	4.20077	3.2771	0.00290826	0.223763	-1.61325
MIR3126	0.337842	2.6119	2.83355	0.00865438	0.297769	-2.54305
ACTG1P17	0.337111	5.15312	2.72285	0.011258	0.316396	-2.76522
SNORA80B	0.33649	6.07909	3.03729	0.0052798	0.26281	-2.12316
COL5A1-AS1	0.335909	4.84714	3.44112	0.00191923	0.203564	-1.25637
LINGO4	0.335731	6.31953	3.68832	0.0010158	0.170255	-0.708546
ZNF300	0.333259	4.15169	2.9465	0.00659053	0.279014	-2.31193
CYP4F3	0.333114	3.86197	2.54443	0.0170476	0.3476	-3.11335
FAM86C2P	0.33306	5.52654	2.83605	0.00860275	0.297057	-2.53798
RNVU1-6	0.33091	4.14841	2.63746	0.013751	0.328703	-2.93344
KRT71	0.330756	4.04464	2.90329	0.0073179	0.286103	-2.40085
ZNF611	0.330128	5.35344	3.32922	0.00255004	0.219235	-1.50049
FSCN1	0.329887	5.56297	3.21097	0.003433	0.232967	-1.75537
PDE4C	0.329542	5.61059	3.5405	0.00148803	0.185232	-1.03744
IGKV1D-8	0.329063	4.55666	3.67568	0.00104967	0.170255	-0.736815
SLC25A5	0.327977	5.70023	3.47725	0.00175003	0.200016	-1.177
PPP1R3C	0.326372	11.0399	3.39384	0.0021648	0.208714	-1.35985
SLC16A3	0.325964	6.1231	2.49393	0.0191302	0.354729	-3.20946
CCL4L1	0.32243	4.14648	2.66177	0.0129932	0.322686	-2.88584
MXD3	0.32038	5.11821	3.84925	0.00066783	0.144422	-0.346842
LINC01759	0.319618	4.08427	3.18688	0.00364592	0.237359	-1.80688
CLDN1	0.319155	3.9341	2.40331	0.0234669	0.369505	-3.3791
LOC105373587	0.317031	3.00722	2.57483	0.015897	0.341729	-3.05495
MIR320C1	0.316476	4.97251	2.74814	0.0106053	0.309596	-2.71486
MIR412	0.316113	6.13951	4.12672	0.000321654	0.104093	0.283566
SREBF1	0.315975	5.42424	4.08266	0.00036141	0.108382	0.183008
CCL13	0.315904	5.30585	3.08577	0.00468581	0.24831	-2.02135
ANXA9	0.31563	4.26018	2.86799	0.00796782	0.290456	-2.47303
SLC9C1	0.315623	4.08444	2.71251	0.0115358	0.317414	-2.78575
IQCF5	0.315574	2.84508	2.93858	0.00671842	0.28077	-2.32826
KRTAP10-4	0.312968	3.65873	2.78691	0.00967339	0.304631	-2.6372
FAM225B	0.312464	3.84779	2.4839	0.0195709	0.356403	-3.22842
MIR346	0.311981	6.99957	3.49495	0.00167249	0.194437	-1.13801
CEACAM18	0.30825	4.95265	2.86734	0.00798019	0.290456	-2.47434
TMEM163	0.308218	4.5196	3.76533	0.000831458	0.166229	-0.535879
MIR3137	0.308122	5.84734	2.74312	0.0107322	0.311576	-2.72489
SYT11	0.30782	6.16627	4.11246	0.000334022	0.104093	0.251009
ATP5MC3	0.307161	8.26359	4.1181	0.000329075	0.104093	0.263885
PECAM1	0.305413	6.04803	2.76414	0.0102109	0.305961	-2.68287
SLC18B1	0.3053	6.04308	3.32064	0.00260594	0.219628	-1.5191
LOC101927120	0.305288	2.79387	2.94359	0.0066372	0.279355	-2.31792
RPSAP9	0.30467	2.40374	3.24674	0.00313879	0.229453	-1.67863
CDH5	0.304523	8.50843	3.03435	0.00531795	0.26281	-2.1293
SLC35F2	0.304395	4.92172	4.20503	0.00026138	0.0958029	0.462587
NEUROD1	0.304377	3.33759	2.35918	0.0258899	0.382392	-3.46031
TGFA-IT1	0.304029	4.06479	3.92527	0.000547139	0.134944	-0.174851
LOC100132077	0.303873	5.20148	2.49042	0.0192835	0.354844	-3.21611
SAA1	0.302856	4.30991	2.60647	0.0147769	0.334112	-2.99378
MCAM	0.302422	4.57226	3.61255	0.00123594	0.180201	-0.877581
CSH1	0.302141	5.08981	2.63191	0.0139296	0.329795	-2.94427
TPM4	0.301559	6.53605	3.22097	0.00334817	0.232584	-1.73395
DAAM2	0.301084	6.5044	2.48031	0.0197312	0.356403	-3.2352
NRP1	0.300504	7.99539	3.64574	0.0011343	0.176084	-0.803646
HIST3H2BB	0.299709	5.96811	2.87005	0.00792841	0.290456	-2.46882
LOC102724062	0.299221	4.7756	2.43044	0.0220822	0.366245	-3.32871
NID2	0.299033	6.39459	2.90903	0.00721694	0.286103	-2.38906
LTB4R	0.298166	4.77716	3.59592	0.00129013	0.18021	-0.914548
FRMD8P1	0.297527	5.25851	2.16878	0.0391758	0.427516	-3.79963
EIF3IP1	0.297119	4.45132	2.331	0.0275541	0.39128	-3.51167
LXN	0.296968	5.43575	3.28137	0.00287719	0.22332	-1.60403
PXDN	0.296698	5.58861	2.78795	0.00964956	0.304631	-2.63511
GOT1	0.295786	10.5038	4.0475	0.000396578	0.113888	0.102874
ADAMTS15	0.295398	4.96434	4.31003	0.00019776	0.0869816	0.703134
TBC1D8-AS1	0.295087	3.97426	2.67689	0.012542	0.321167	-2.85613
LCE2D	0.295007	4.55731	2.47304	0.0200587	0.358459	-3.2489
TOP2A	0.294527	3.69593	3.34176	0.00247043	0.218801	-1.47326
PHEX	0.294396	2.59007	3.11459	0.00436349	0.244806	-1.9605
BHLHA15	0.294342	6.8711	2.90347	0.00731459	0.286103	-2.40047
CCL18	0.294067	4.75784	2.47032	0.0201826	0.358784	-3.25401
NPFF	0.293588	4.76928	2.88115	0.00771944	0.290456	-2.44618
SNTB1	0.293551	6.79941	2.40408	0.0234264	0.369465	-3.37767
MIR519D	0.292821	3.75955	2.13254	0.0423099	0.436252	-3.86207
DNM1P35	0.291424	6.09166	3.21329	0.0034131	0.232967	-1.7504
AMOT	0.291139	7.16386	2.80039	0.00936783	0.304631	-2.61007
PGAM2	0.29104	10.4948	3.03312	0.00533407	0.263114	-2.13188
LOC101928499	0.290568	4.012	2.99864	0.00580418	0.267784	-2.20383
SPARC	0.289878	7.2895	2.72475	0.0112079	0.316396	-2.76146
EPHX2	0.289874	5.45547	3.32833	0.0025558	0.219235	-1.50243
LOC105369363	0.28784	4.3847	3.17281	0.00377608	0.238856	-1.83689
CHIT1	0.287506	4.79438	3.98668	0.000465544	0.122857	-0.0354871
GTSE1	0.287068	3.9954	3.33879	0.00248906	0.219001	-1.47971
GJB1	0.286556	4.53676	3.55211	0.00144425	0.184673	-1.01173
SNORD96B	0.285879	4.1839	2.08425	0.0468347	0.447298	-3.94417
DENND2A	0.285324	4.74067	2.97926	0.00608536	0.269451	-2.2441
SMOC2	0.28459	7.12254	2.75287	0.0104873	0.309596	-2.70542
BTN2A3P	0.284485	4.37218	2.49888	0.0189162	0.354017	-3.20009
VCX2	0.284221	6.23348	2.27172	0.0313783	0.408443	-3.61846
MDH1	0.284022	9.25655	3.63916	0.00115379	0.177575	-0.818327
RAX	0.283913	4.6885	2.64722	0.013442	0.325251	-2.91436
VEGFA	0.28384	7.09819	2.32608	0.0278549	0.392677	-3.52061
LOC105378618	0.282861	4.04506	2.3869	0.0243422	0.374037	-3.4094
TEX44	0.282464	5.05536	2.60162	0.0149437	0.334775	-3.00318
LAMA4	0.281573	7.15089	2.40546	0.0233541	0.369334	-3.37511
FAM181A-AS1	0.281335	5.14918	2.50757	0.0185457	0.351676	-3.18361
PLS3	0.280758	7.21837	2.73097	0.0110446	0.314419	-2.74908
IRX3	0.28073	6.72388	3.67611	0.0010485	0.170255	-0.735855
C15orf56	0.280075	5.4391	2.9233	0.00697207	0.284694	-2.35975
FTHL17	0.280059	5.48913	2.83862	0.00854978	0.297057	-2.53275
TMEM174	0.279696	3.75186	2.79122	0.00957464	0.304631	-2.62853
LOC101929762	0.279398	3.47488	3.15349	0.00396201	0.240174	-1.878
MIR921	0.279051	4.21884	2.27616	0.0310761	0.408413	-3.61053
CCDC153	0.278881	5.29314	2.96678	0.00627332	0.272075	-2.26998
C3orf35	0.277386	6.22023	2.92038	0.00702141	0.285508	-2.36574
SP2-AS1	0.277294	4.60436	2.51111	0.0183967	0.350534	-3.17689
RUNX3	0.277261	4.16838	3.16841	0.00381762	0.238856	-1.84625
CD93	0.277108	6.77291	3.09417	0.00458955	0.24789	-2.00363
CST4	0.276945	6.37808	3.05069	0.00510878	0.259821	-2.09509
GPR45	0.276416	4.16411	3.209	0.00344996	0.232967	-1.75959
LINC00535	0.276328	4.11664	3.58967	0.00131112	0.18021	-0.928447
UCP3	0.276162	8.18827	2.52959	0.0176366	0.34833	-3.1417
LINC02495	0.275297	4.31065	2.86509	0.00802358	0.290456	-2.47894
LOC105373654	0.275223	3.81297	2.93121	0.00683966	0.28247	-2.34346
SCN4B	0.274669	6.12698	3.30708	0.00269667	0.220331	-1.54846
ADAMTS7	0.27465	4.73733	2.29121	0.0300713	0.404682	-3.58356
KIT	0.274619	5.61997	2.17748	0.0384548	0.426165	-3.78453
LYSMD2	0.274483	4.98767	3.34215	0.00246802	0.218801	-1.47243
CD109	0.274374	5.18748	2.32852	0.0277051	0.391566	-3.51617
TMIE	0.274366	5.77116	3.78079	0.000798621	0.16212	-0.501127
CYP1A1	0.274284	4.19001	3.10241	0.00449699	0.247031	-1.98624
APLNR	0.273938	5.47539	2.84414	0.00843752	0.296498	-2.52156
ACSL1	0.273549	9.47979	2.26079	0.0321339	0.409143	-3.63796
MUC7	0.273434	3.80241	2.9742	0.00616085	0.271471	-2.25459
INSL4	0.273325	4.09322	3.59382	0.00129715	0.18021	-0.919224
OR2V1	0.273105	4.16425	2.42778	0.0222143	0.366245	-3.33365
TTTY12	0.273086	2.76573	2.26768	0.0316555	0.408443	-3.62567
MIR106B	0.270695	5.77949	3.72277	0.000928876	0.170255	-0.631422
CHTF18	0.27009	4.93175	2.48872	0.0193581	0.355011	-3.21932
GNG11	0.270081	5.48832	2.13453	0.0421322	0.435888	-3.85866
ANKRD20A19P	0.269709	5.18724	2.61365	0.014533	0.33236	-2.97983
SAGE1	0.268909	3.39478	3.59233	0.00130214	0.18021	-0.922529
FAHD2A	0.268702	4.88251	2.28765	0.030306	0.405768	-3.58994
ATP6V1C2	0.267686	4.49032	3.42514	0.00199906	0.204975	-1.2914
PYDC2	0.267686	4.10077	2.98409	0.00601406	0.268729	-2.23407
LOC105378456	0.267383	3.9714	2.11981	0.0434634	0.439464	-3.88384
MIR1258	0.267331	3.69657	2.34668	0.0266165	0.387002	-3.48314
PROC	0.266069	5.46731	3.86825	0.000635411	0.142106	-0.303909
SLC32A1	0.265904	5.14231	3.24851	0.00312489	0.229072	-1.67483
LOC100507443	0.265894	5.06004	3.01995	0.00550917	0.263136	-2.1594
LOC105372097	0.265068	5.8532	2.17118	0.0389755	0.427272	-3.79547
TNFAIP8L3	0.264283	4.07188	2.85271	0.00826586	0.296498	-2.50415
PFKM	0.263948	8.50409	2.98332	0.00602535	0.268729	-2.23567
MIR1301	0.263731	6.56095	2.48117	0.0196929	0.356403	-3.23359
LOC102724659	0.263501	4.78036	2.98912	0.00594067	0.268729	-2.22362
RBFADN	0.263324	4.06397	3.40707	0.00209314	0.208714	-1.33092
CARM1	-0.263029	8.08114	-3.75219	0.000860433	0.168199	-0.565421
CPT2	-0.263322	6.39268	-2.15037	0.0407413	0.431936	-3.83145
POGZ	-0.263877	6.15757	-3.51895	0.00157271	0.190952	-1.08507
ZFAT-AS1	-0.264052	3.90534	-2.49332	0.0191571	0.354729	-3.21063
BCOR	-0.26412	6.32348	-3.56581	0.00139423	0.184673	-0.981378
CDK15	-0.264504	4.4375	-2.29067	0.0301066	0.404751	-3.58452
CCP110	-0.264728	5.9574	-3.1718	0.00378552	0.238856	-1.83903
ST6GALNAC2	-0.265243	8.07202	-2.78325	0.00975798	0.304631	-2.64456
ROCR	-0.265348	3.16441	-2.98259	0.00603618	0.268729	-2.2372
PDSS2	-0.265642	4.62991	-2.13082	0.0424643	0.436319	-3.86502
BBS4	-0.265651	6.26646	-2.69671	0.0119722	0.317684	-2.81701
NEK7	-0.266109	6.99454	-2.64181	0.0136126	0.326776	-2.92495
LOC105374363	-0.266426	4.67491	-3.28144	0.00287667	0.22332	-1.60388
PPP3CC	-0.266461	6.37327	-2.53887	0.017266	0.347701	-3.12398
H3F3B	-0.266845	7.90236	-3.2331	0.00324804	0.231665	-1.70794
IL6R	-0.267239	6.53529	-3.04819	0.00514021	0.260355	-2.10032
DERL1	-0.267575	7.59632	-2.75149	0.0105216	0.309596	-2.70817
KCNMA1	-0.267724	6.49171	-2.66846	0.0127917	0.32242	-2.8727
WBP1L	-0.267978	8.52621	-2.84772	0.00836538	0.296498	-2.51429
MIR4773-2	-0.268323	2.75645	-2.07305	0.0479434	0.45047	-3.96301
GALNT1	-0.268394	7.55835	-2.6202	0.014314	0.330197	-2.9671
CFAP70	-0.26856	4.6992	-3.39343	0.00216702	0.208714	-1.36073
ASB4	-0.268616	6.01683	-2.65384	0.0132361	0.323125	-2.9014
MCM8	-0.268789	7.54269	-2.48583	0.0194857	0.355981	-3.22479
GPATCH8	-0.268793	7.75346	-3.88814	0.000603134	0.139823	-0.258927
KBTBD7	-0.268847	5.27179	-2.49179	0.0192235	0.354844	-3.21351
SELENBP1	-0.268847	6.00812	-3.09325	0.00459994	0.24789	-2.00556
SYNPO2L	-0.269247	8.02051	-3.62319	0.00120244	0.179147	-0.853909
CHRAC1	-0.269606	6.27126	-4.6481	8.02568e-05	0.0638227	1.4797
FOXN2	-0.270129	7.34459	-2.91217	0.00716242	0.285963	-2.38262
LOC728989	-0.270153	8.75678	-5.17408	1.96719e-05	0.0370223	2.68435
ERRFI1	-0.270725	6.4992	-3.2242	0.00332121	0.232439	-1.72702
FXR2	-0.270748	6.3926	-3.20246	0.00350682	0.234738	-1.77359
LMAN2L	-0.271075	6.10506	-2.84309	0.00845879	0.296498	-2.52369
NUDT12	-0.271542	5.64041	-3.03005	0.00537442	0.263136	-2.1383
HJV	-0.271564	9.05115	-3.318	0.00262339	0.219628	-1.52482
CLCN4	-0.271716	7.53755	-3.22367	0.00332561	0.232439	-1.72816
MPP6	-0.27214	6.65998	-2.6103	0.0146462	0.332914	-2.98633
MIR301B	-0.272322	2.41466	-2.39836	0.0237278	0.370866	-3.38825
KLF9	-0.272469	6.79093	-3.59594	0.00129008	0.18021	-0.914511
ANKRD37	-0.272609	5.81277	-2.50354	0.0187169	0.352699	-3.19127
IMPDH2	-0.272953	7.56409	-2.83527	0.00861867	0.297057	-2.53955
RPL21P44	-0.273153	4.71346	-2.36603	0.0254989	0.379133	-3.44775
N4BP2L2-IT2	-0.27339	8.25015	-3.31213	0.00266252	0.219628	-1.53753
SLPI	-0.27341	4.42896	-2.10211	0.045113	0.442084	-3.91395
STK33	-0.273726	5.20096	-2.25109	0.0328184	0.409858	-3.65522
CEP85L	-0.273993	4.7712	-2.63702	0.013765	0.328712	-2.93429
CHMP1B	-0.275086	8.38717	-3.1782	0.00372568	0.238696	-1.8254
RHOBTB1	-0.27534	8.95983	-3.11397	0.00437021	0.244806	-1.96181
ARID4A	-0.27545	6.0174	-2.72575	0.0111814	0.316396	-2.75946
AR	-0.275579	6.48706	-5.27911	1.48655e-05	0.0370223	2.92317
GLYATL2	-0.2758	2.91343	-2.39401	0.023959	0.372636	-3.39627
FAM133B	-0.275835	4.31977	-2.29595	0.0297607	0.403777	-3.57503
ZNF107	-0.275893	5.05229	-2.12635	0.0428672	0.438135	-3.87266
OR5D13	-0.276404	2.24901	-2.46563	0.0203979	0.360592	-3.26284
BMPR1B	-0.276507	4.62672	-2.73386	0.0109695	0.313634	-2.74333
STK17A	-0.276732	5.06999	-2.10676	0.0446745	0.441532	-3.90606
NUB1	-0.276944	6.9563	-4.54274	0.00010635	0.0654877	1.23754
LOC105374527	-0.277282	4.20706	-2.1302	0.0425205	0.436371	-3.86609
PPIL6	-0.277363	4.72399	-2.79888	0.00940149	0.304631	-2.6131
OR4A15	-0.277608	2.8353	-2.9687	0.00624409	0.272075	-2.26601
WEE1	-0.277807	5.9729	-3.40995	0.00207788	0.208714	-1.32464
CNOT4	-0.279122	7.49126	-5.18219	1.92505e-05	0.0370223	2.70282
SNORD4B	-0.279543	4.48941	-2.83589	0.00860606	0.297057	-2.53831
MYL3	-0.280013	11.5022	-2.51721	0.0181425	0.34922	-3.16529
AMFR	-0.280029	8.5798	-4.01834	0.000428282	0.119422	0.0365058
GALNT2	-0.280382	6.67223	-3.67261	0.00105805	0.170255	-0.743667
TTC39B	-0.280582	5.05171	-2.63628	0.0137887	0.328712	-2.93574
NCOA3	-0.280721	8.25072	-2.92183	0.00699687	0.28495	-2.36276
LRIF1	-0.281227	6.283	-3.47707	0.00175081	0.200016	-1.17738
PNPO	-0.281289	6.6395	-2.17365	0.0387708	0.4267	-3.79118
LOC102724465	-0.281328	5.73015	-2.27174	0.0313773	0.408443	-3.61844
POLR2C	-0.281783	7.12331	-3.19561	0.00356733	0.235945	-1.78823
ZNF385B	-0.28182	5.93106	-2.29842	0.0295998	0.402442	-3.57058
MIS12	-0.281883	6.29609	-2.70093	0.0118542	0.317414	-2.80867
ZNF502	-0.282143	5.13864	-2.54312	0.017099	0.347645	-3.11587
THAP9	-0.282438	5.65049	-3.29512	0.00277925	0.222954	-1.57434
DCAF17	-0.282858	5.63688	-3.55428	0.00143621	0.184673	-1.00692
PPM1K	-0.282924	5.94061	-2.13921	0.0417174	0.434674	-3.85064
IMPA2	-0.283119	8.83381	-2.42041	0.0225848	0.366636	-3.34737
LOC105374642	-0.283536	3.9581	-4.15803	0.000296064	0.101137	0.355091
FHL2	-0.283645	6.46874	-2.88746	0.00760284	0.290012	-2.43327
PDZRN3-AS1	-0.283887	4.34858	-2.98632	0.00598138	0.268729	-2.22944
LOC102723834	-0.284315	4.46832	-2.09248	0.0460338	0.445619	-3.93026
B3GNT10	-0.2849	4.72481	-3.1369	0.00412873	0.242666	-1.91324
NFIC	-0.285054	9.07688	-3.508	0.00161749	0.193635	-1.10924
HIST1H1C	-0.286287	7.0623	-2.17488	0.0386689	0.426441	-3.78905
ZSWIM1	-0.287495	6.04939	-3.2968	0.00276749	0.222954	-1.5707
PIAS1	-0.287605	8.02522	-4.33085	0.000187104	0.0861177	0.750889
LOC105371301	-0.287714	3.23842	-2.42612	0.0222973	0.366245	-3.33674
CDC23	-0.288119	6.35673	-3.45053	0.0018737	0.203564	-1.23572
OR9Q2	-0.288616	4.37729	-3.16821	0.00381952	0.238856	-1.84668
CSRP2	-0.288666	5.77848	-2.86149	0.00809331	0.291779	-2.48627
TSTD3	-0.289115	6.99198	-2.87144	0.00790195	0.290456	-2.46599
CTNNA3	-0.289294	8.35274	-3.64653	0.00113201	0.176084	-0.801899
NEK4	-0.289567	6.66299	-5.02889	2.89906e-05	0.0450037	2.35305
DNAH3	-0.289643	4.04201	-4.26983	0.000220066	0.0893468	0.610979
KIAA1217	-0.289663	7.97906	-3.44889	0.00188154	0.203564	-1.23931
BCL6	-0.289764	9.00825	-3.02894	0.0053891	0.263136	-2.14063
ARRDC2	-0.291359	6.53352	-2.23443	0.0340244	0.414875	-3.68473
RAP2A	-0.291417	6.42275	-3.01688	0.0055507	0.263233	-2.1658
ADAL	-0.292056	7.10454	-3.46436	0.00180864	0.203564	-1.20533
C9orf72	-0.292146	6.07275	-2.41885	0.0226643	0.366806	-3.35028
ZNF567	-0.292262	4.27069	-2.52577	0.0177913	0.34833	-3.14899
LINC01061	-0.292959	6.69418	-2.38739	0.0243158	0.374037	-3.4085
H6PD	-0.293242	5.93028	-3.69529	0.000997617	0.170255	-0.692974
TGFBR3	-0.293352	6.79327	-3.54497	0.00147102	0.184673	-1.02754
HSF2	-0.293438	7.47572	-2.86523	0.0080209	0.290456	-2.47866
SCARNA6	-0.293535	6.6671	-2.77464	0.00995977	0.304631	-2.66185
CTH	-0.29444	4.28074	-2.34836	0.0265176	0.386351	-3.48007
LINC01239	-0.294589	4.47519	-3.43124	0.00196822	0.203564	-1.27804
PCDHB4	-0.294808	4.02	-2.62116	0.0142819	0.330035	-2.96522
LOC105379164	-0.295181	4.07043	-2.7077	0.011667	0.317414	-2.79528
PLA2G16	-0.29545	7.36662	-4.1544	0.000298926	0.101137	0.346793
SRP14-AS1	-0.295647	4.28559	-3.54351	0.00147654	0.184673	-1.03076
SUGT1P1	-0.295998	4.97358	-2.93434	0.00678786	0.28077	-2.337
PPP1R2B	-0.296025	2.91689	-2.67464	0.0126082	0.321167	-2.86055
LOC105374748	-0.296513	3.8578	-2.22204	0.0349467	0.417938	-3.70658
NT5C1A	-0.296853	7.16727	-2.69239	0.0120945	0.318624	-2.82557
KAT2B	-0.296875	8.77912	-3.68245	0.00103141	0.170255	-0.721692
BVES-AS1	-0.297288	6.8563	-3.63761	0.00115842	0.177575	-0.821773
LINC02328	-0.297308	4.46041	-2.41526	0.0228471	0.367344	-3.35693
FRA10AC1	-0.297367	5.64418	-3.31667	0.00263218	0.219628	-1.52769
GUSBP4	-0.297418	6.60177	-3.71298	0.000952823	0.170255	-0.653368
SFR1	-0.297838	4.65699	-2.60753	0.0147406	0.333907	-2.99172
MIR938	-0.298005	7.39489	-2.14774	0.0409689	0.432122	-3.83597
FABP9	-0.298013	3.16998	-3.16068	0.00389176	0.239962	-1.86271
C1orf158	-0.29813	3.56926	-2.18123	0.0381482	0.425321	-3.77802
MAPK1IP1L	-0.298716	6.64125	-3.34171	0.00247073	0.218801	-1.47337
TMEM99	-0.299323	5.15699	-4.62146	8.61791e-05	0.0638227	1.41847
SLC1A3	-0.299578	5.75729	-2.60429	0.0148515	0.33434	-2.998
PRKAR2B	-0.299622	5.39701	-2.48753	0.0194105	0.355231	-3.22157
ASB11	-0.300312	9.16293	-4.35633	0.000174836	0.0838897	0.809346
SNRNP48	-0.30046	6.12222	-3.17423	0.00376269	0.238696	-1.83386
TMEM14EP	-0.300491	7.33833	-2.57136	0.0160248	0.341729	-3.06164
CYP3A43	-0.300797	3.05256	-2.54441	0.0170484	0.3476	-3.11339
ANOS1	-0.301043	7.74432	-3.76961	0.000822249	0.165642	-0.526274
SMCO1	-0.3015	7.98649	-3.54649	0.0014653	0.184673	-1.02419
TUBB1	-0.302309	4.39397	-2.36881	0.0253419	0.379133	-3.44265
ILF3-DT	-0.303158	6.04108	-2.89913	0.00739177	0.286445	-2.40938
MAP3K2	-0.303363	7.30877	-2.28486	0.0304911	0.406146	-3.59494
HSPB1	-0.303448	11.1288	-3.46103	0.00182412	0.203564	-1.21266
GGT7	-0.304449	6.62278	-2.13887	0.0417466	0.434674	-3.85121
KIAA1143	-0.304671	6.90966	-3.3108	0.00267149	0.219628	-1.54041
KCNN3	-0.304803	6.38044	-3.18298	0.00368154	0.238696	-1.8152
RMND5A	-0.304959	8.24131	-3.49916	0.00165456	0.194062	-1.12874
BEND6	-0.305115	3.98619	-3.04983	0.00511962	0.259821	-2.0969
WHAMMP1	-0.305118	5.17579	-2.23033	0.0343275	0.415989	-3.69198
TSPAN31	-0.305545	5.01466	-3.71539	0.000946858	0.170255	-0.647953
ICE2	-0.305648	6.74749	-3.70462	0.000973721	0.170255	-0.672072
IPP	-0.30711	6.2035	-3.54733	0.00146213	0.184673	-1.02232
OR5B3	-0.307278	3.78685	-2.11261	0.0441275	0.441235	-3.8961
WDR5B	-0.307487	5.47592	-2.73319	0.0109869	0.313793	-2.74467
LOC105376070	-0.307853	4.69033	-3.02563	0.00543298	0.263136	-2.14754
TTF1	-0.307937	5.96109	-3.05339	0.00507494	0.259608	-2.08942
UBAP2	-0.308743	8.32375	-4.97519	3.34659e-05	0.0464824	2.2302
VN1R1	-0.309485	5.13443	-2.41851	0.0226812	0.366806	-3.35089
ZNF614	-0.310429	6.64428	-3.52163	0.00156192	0.190829	-1.07915
IFT81	-0.310758	5.35609	-2.63245	0.0139122	0.329795	-2.94322
SNORD114-2	-0.310772	4.04121	-2.25238	0.0327267	0.409858	-3.65293
ASCC1	-0.311354	6.43697	-2.84543	0.00841147	0.296498	-2.51894
LINC00571	-0.311435	2.91873	-2.38398	0.0245012	0.375051	-3.41478
SNORA16B	-0.311439	5.98063	-2.36665	0.0254639	0.379133	-3.44662
FOPNL	-0.31159	8.27934	-5.21061	1.78445e-05	0.0370223	2.76751
MYL6B	-0.311786	5.99241	-2.75892	0.0103381	0.306888	-2.69333
PRKN	-0.312599	8.44055	-4.19819	0.000266167	0.0962213	0.446929
ZNF420	-0.313198	5.04417	-3.37642	0.00226272	0.214058	-1.39785
ATF7IP	-0.313408	7.5563	-5.56253	6.99752e-06	0.0230831	3.56314
MIR3942	-0.315484	5.10953	-2.25653	0.032433	0.409858	-3.64555
LOC102724552	-0.315619	3.81087	-2.90337	0.00731648	0.286103	-2.40069
CCDC141	-0.315933	5.32621	-3.19177	0.0036017	0.237029	-1.79644
LOC100506258	-0.315952	3.96994	-3.03754	0.00527654	0.26281	-2.12264
ZBTB20-AS4	-0.316727	3.78612	-2.33464	0.0273339	0.390548	-3.50506
LOC105372109	-0.316814	3.37937	-2.58159	0.0156512	0.341729	-3.04191
EZH1	-0.317497	8.09284	-5.00055	3.12724e-05	0.0458489	2.28823
LOC101928711	-0.318075	2.67815	-2.98692	0.0059727	0.268729	-2.2282
BCKDHB	-0.319556	6.15199	-3.39803	0.00214187	0.208714	-1.3507
UNC13B	-0.319684	7.42729	-3.37185	0.00228907	0.214058	-1.4078
ZNF615	-0.321588	4.78137	-2.29574	0.0297746	0.403777	-3.57541
MIR488	-0.321813	2.62264	-2.5832	0.0155934	0.341729	-3.03882
PGPEP1L	-0.322445	6.935	-2.67612	0.0125644	0.321167	-2.85763
OR8I2	-0.322932	3.18673	-2.78111	0.00980769	0.304631	-2.64885
TMEM47	-0.323256	8.91174	-4.12454	0.00032352	0.104093	0.278574
FAM46C	-0.323661	7.83955	-2.91928	0.00704018	0.285832	-2.36801
TSPAN8	-0.325074	6.04722	-2.92557	0.00693379	0.284592	-2.35507
ART3	-0.325174	7.12414	-3.96498	0.000492906	0.127527	-0.0847732
ADHFE1	-0.325889	8.40585	-4.32653	0.00018927	0.0861177	0.740967
FAM227B	-0.325986	4.48593	-4.02351	0.000422482	0.119422	0.0482712
FRK	-0.326746	5.76442	-2.53707	0.0173375	0.347701	-3.12743
SF3A1	-0.326805	6.84529	-5.09708	2.41618e-05	0.0398519	2.50881
AATF	-0.32702	6.668	-3.6731	0.00105672	0.170255	-0.742583
FCGR1A	-0.327055	3.25242	-2.35539	0.0261079	0.38341	-3.46723
TTLL7-IT1	-0.327853	5.42746	-2.74413	0.0107066	0.311517	-2.72287
YIPF7	-0.327862	8.03481	-4.34862	0.000178462	0.0841004	0.791653
EFR3A	-0.328293	8.67298	-5.16064	2.03904e-05	0.0370223	2.65373
LOC105371006	-0.329416	3.91767	-2.52541	0.0178059	0.34833	-3.14967
ALPK3	-0.329779	8.31457	-4.16994	0.000286867	0.100939	0.382318
CIR1	-0.329836	6.37803	-2.73389	0.0109687	0.313634	-2.74327
KIAA1107	-0.331065	5.46072	-2.77852	0.00986829	0.304631	-2.65405
OR52K2	-0.332317	3.98808	-2.64675	0.0134568	0.325251	-2.91528
EGFR	-0.33442	6.82156	-4.4617	0.00013203	0.0725888	1.05131
IL17D	-0.334506	6.69652	-2.70732	0.0116775	0.317414	-2.79603
LOC105374325	-0.33511	5.3908	-4.13532	0.000314416	0.104093	0.303203
GUSBP2	-0.335258	4.49277	-2.65327	0.0132537	0.323125	-2.90251
MIR604	-0.335853	8.07929	-2.81642	0.00901614	0.301315	-2.57771
AOX1	-0.337014	4.83464	-3.65341	0.00111201	0.174679	-0.786543
FOXP2	-0.337241	5.80538	-2.76127	0.0102808	0.305961	-2.68863
ZNF225	-0.337485	4.62454	-3.90223	0.000581248	0.136957	-0.227034
HMGN2	-0.338047	4.62339	-2.83595	0.00860464	0.297057	-2.53817
ADH1B	-0.338476	5.24321	-2.36318	0.0256608	0.380657	-3.45298
EPB41	-0.339022	7.33348	-3.63552	0.00116471	0.177575	-0.826439
UNC13C	-0.339328	5.7221	-2.43509	0.0218526	0.366245	-3.32004
LOC105372061	-0.339722	5.82369	-2.0795	0.0473017	0.448542	-3.95216
NUP160	-0.342138	6.20835	-3.90508	0.000576922	0.136957	-0.220588
EMD	-0.342238	7.98376	-3.02232	0.00547723	0.263136	-2.15445
MIR331	-0.342634	5.14224	-2.22543	0.0346923	0.417003	-3.70061
LOC441666	-0.344374	1.9945	-2.89833	0.007406	0.286575	-2.41101
MIR513A1	-0.344662	3.70702	-2.38722	0.0243249	0.374037	-3.4088
SVIP	-0.345955	4.84062	-3.06277	0.00495916	0.256312	-2.06974
JPT1	-0.346633	5.7431	-3.68506	0.00102444	0.170255	-0.715844
WBP11	-0.348222	6.37901	-4.40121	0.000155137	0.0772463	0.912373
ZFP36	-0.348629	6.70077	-3.37622	0.00226388	0.214058	-1.39829
DMGDH	-0.349459	5.59762	-3.23523	0.00323071	0.231665	-1.70336
LINC02541	-0.350886	5.59326	-2.88004	0.00773995	0.290456	-2.44843
CASTOR2	-0.352613	6.90848	-3.16078	0.00389081	0.239962	-1.8625
LOC102724880	-0.352793	5.72348	-4.54403	0.000105985	0.0654877	1.2405
MIR550B1	-0.353055	3.20438	-2.25532	0.0325182	0.409858	-3.6477
PDLIM3	-0.353187	10.7741	-4.10225	0.000343163	0.104093	0.227711
CADM2	-0.35497	5.58479	-4.84058	4.79673e-05	0.0518594	1.92172
CD38	-0.355222	7.95766	-3.07296	0.0048362	0.252343	-2.04831
MIR4681	-0.355746	5.83533	-3.45897	0.00183375	0.203564	-1.21719
OR2A2	-0.355862	3.55131	-2.41434	0.0228944	0.367344	-3.35864
KIF1B	-0.355963	8.59082	-4.49029	0.000122333	0.0716654	1.117
CPM	-0.356168	5.16754	-3.5633	0.00140328	0.184673	-0.986947
HSPB3	-0.356288	7.89004	-3.99477	0.000455734	0.122857	-0.0171085
LINC-PINT	-0.358737	6.29801	-3.90761	0.000573099	0.136957	-0.214851
EYA1	-0.360997	6.95306	-3.4685	0.0017896	0.203564	-1.19623
ALDH6A1	-0.362293	6.82025	-2.91495	0.0071143	0.285963	-2.3769
EGF	-0.363717	7.34038	-3.09845	0.00454126	0.24789	-1.9946
VTRNA2-1	-0.363723	3.74945	-2.16886	0.0391694	0.427516	-3.7995
MT1X	-0.365062	10.3523	-3.00539	0.00570905	0.265448	-2.18976
PFN2	-0.366163	7.73552	-4.46721	0.000130102	0.0725888	1.06398
LINC02553	-0.366859	3.56103	-3.50881	0.00161414	0.193635	-1.10745
C8orf88	-0.371285	4.13313	-3.97487	0.000480249	0.125483	-0.0623249
LINC00390	-0.371954	5.63191	-3.31194	0.00266385	0.219628	-1.53796
MIR3671	-0.372866	7.07646	-3.04743	0.00514988	0.260355	-2.10192
PYGO1	-0.373699	6.81897	-4.43599	0.000141402	0.0753973	0.992241
ZNF658	-0.37525	2.65105	-3.44026	0.00192345	0.203564	-1.25825
ADH1C	-0.375907	7.07128	-3.09584	0.00457061	0.24789	-2.0001
B3GALT1	-0.376959	4.90896	-3.60044	0.0012752	0.18021	-0.904519
ZNF844	-0.379229	5.80201	-2.13874	0.0417581	0.434674	-3.85143
PRKAG3	-0.381615	7.35764	-2.98675	0.00597524	0.268729	-2.22856
USP6	-0.383272	5.4436	-3.00231	0.00575228	0.266321	-2.19619
TSC22D1	-0.384396	7.31917	-3.71616	0.000944978	0.170255	-0.64624
LOC105373713	-0.384921	5.48781	-2.66239	0.0129745	0.322686	-2.88463
AASS	-0.388488	7.17796	-4.22585	0.000247335	0.0932453	0.510228
NT5C2	-0.38863	8.46414	-3.50446	0.00163224	0.194031	-1.11705
LINC01479	-0.388832	6.25425	-2.0564	0.0496348	0.454398	-3.99091
GSTM5	-0.392266	4.01834	-2.66386	0.0129299	0.322686	-2.88173
MYLK2	-0.393254	9.24483	-4.30331	0.000201329	0.0870995	0.687714
HIST2H2AC	-0.396971	10.0725	-3.32788	0.00255871	0.219235	-1.5034
CYP3A4	-0.397103	3.3382	-2.57616	0.0158487	0.341729	-3.0524
MKNK2	-0.397641	7.95709	-3.79265	0.000774284	0.160893	-0.474433
FBXO48	-0.402127	6.10724	-4.43216	0.000142852	0.0753973	0.983451
LGI1	-0.402785	5.98608	-2.17238	0.0388763	0.427122	-3.7934
DHCR24	-0.408185	6.52857	-2.30142	0.0294062	0.401787	-3.56519
MGST1	-0.408205	3.67275	-2.7684	0.0101082	0.304631	-2.67434
LOC441455	-0.409176	2.35123	-2.77306	0.00999709	0.304631	-2.665
NEK10	-0.411837	6.92568	-2.8412	0.00849715	0.296498	-2.52752
BTBD8	-0.415247	4.41279	-2.71932	0.0113523	0.317066	-2.77224
ZXDA	-0.415697	5.21876	-3.92646	0.000545429	0.134944	-0.172149
MIR15A	-0.420632	5.1932	-3.67609	0.00104856	0.170255	-0.735904
MYOZ2	-0.421985	10.2797	-2.83006	0.00872685	0.298063	-2.55011
USP54	-0.422673	7.6816	-2.89942	0.00738649	0.286445	-2.40877
LINC02308	-0.424005	5.01187	-4.67164	7.53627e-05	0.0621507	1.53378
FYB2	-0.424857	5.13588	-2.74136	0.0107768	0.311653	-2.72839
GPT2	-0.425189	6.90547	-2.79513	0.00948587	0.304631	-2.62065
NRAP	-0.429013	11.9833	-5.81757	3.56655e-06	0.0134459	4.13228
RBMS3-AS3	-0.430688	3.75692	-2.8706	0.00791802	0.290456	-2.46771
SLC25A33	-0.432028	6.96627	-2.74841	0.0105987	0.309596	-2.71433
LOC105370728	-0.432148	3.45757	-3.50094	0.00164702	0.194039	-1.1248
MFAP4	-0.435186	7.4508	-3.38464	0.00221597	0.211882	-1.37992
PPDPFL	-0.438977	11.2443	-4.72723	6.49543e-05	0.0571382	1.66149
HAS2	-0.439427	4.82045	-2.87569	0.00782158	0.290456	-2.45732
IFIT1	-0.442423	5.54383	-3.50702	0.00162157	0.193635	-1.11141
PAIP2B	-0.445225	8.75062	-2.98397	0.00601591	0.268729	-2.23433
SH3RF2	-0.451956	6.45794	-4.80367	5.29448e-05	0.0518594	1.83701
FAM126A	-0.47375	7.06666	-4.12562	0.000322596	0.104093	0.281041
ALDH2	-0.49365	7.70182	-5.16453	2.01798e-05	0.0370223	2.66259
OXCT1	-0.496075	6.55102	-3.98698	0.000465178	0.122857	-0.0348083
MBNL3	-0.497773	4.29093	-2.99039	0.00592236	0.268729	-2.22099
LOC646903	-0.501865	7.10828	-2.64199	0.0136068	0.326776	-2.92459
POLR2J	-0.503765	6.48542	-3.43699	0.00193958	0.203564	-1.26543
MIR3975	-0.509291	3.73165	-2.1819	0.0380938	0.425321	-3.77686
MYHAS	-0.516646	5.45654	-3.14885	0.004008	0.240515	-1.88787
LOC105370765	-0.521952	4.54699	-4.18119	0.00027844	0.0992976	0.408042
ASB15	-0.524492	8.80356	-5.84587	3.31049e-06	0.0134459	4.19499
LOC646736	-0.52526	7.28825	-4.10654	0.000339298	0.104093	0.237487
LOC105379011	-0.527024	5.50666	-2.4818	0.0196644	0.356403	-3.23238
ANKRD2	-0.556921	9.0522	-2.78395	0.00974175	0.304631	-2.64315
BTG2	-0.565801	8.48864	-2.61607	0.0144518	0.33168	-2.97513
IL32	-0.568058	6.02929	-4.20941	0.000258365	0.0958029	0.472594
LOC105374523	-0.57772	8.54479	-4.10978	0.000336405	0.104093	0.244875
MYOM3	-0.585934	7.82057	-4.52724	0.000110845	0.0664817	1.20191
TP63	-0.593627	6.77638	-5.88802	2.96316e-06	0.0134459	4.28821
HBA1	-0.602787	7.54493	-2.1997	0.0366681	0.421742	-3.7458
MIR944	-0.605625	2.87256	-2.42334	0.022437	0.366245	-3.34192
LOC105378029	-0.622652	6.83606	-3.22322	0.00332936	0.232439	-1.72912
PDE11A	-0.631683	4.27941	-4.87871	4.33166e-05	0.0518594	2.00917
LOC102724637	-0.653435	4.77384	-3.2382	0.00320675	0.231665	-1.69698
MYH1	-0.675105	11.6065	-2.49366	0.0191423	0.354729	-3.20999
IL18	-0.682351	5.25647	-4.06766	0.000376017	0.111496	0.148816
LINC01854	-0.779101	6.89311	-3.10792	0.00443611	0.245917	-1.9746
SMTNL1	-0.799998	7.86177	-4.73191	6.41458e-05	0.0571382	1.67225
HSD52	-0.827029	4.90561	-3.62129	0.00120834	0.179147	-0.85813
FLRT3	-0.834868	4.51564	-4.58769	9.43193e-05	0.0638227	1.34084
LGR5	-0.848239	7.95976	-3.02062	0.00550007	0.263136	-2.158
MSTN	-0.870948	6.59366	-4.75069	6.10044e-05	0.0571382	1.71538
LINC01091	-0.932439	5.09775	-4.56497	0.00010022	0.0654877	1.28863
PRG4	-0.953511	6.5581	-3.32326	0.00258877	0.219628	-1.51342
LANCL1-AS1	-1.24438	5.7063	-7.55361	4.28124e-08	0.00056491	7.76831

## Sheet: overlapped DEGs
53 common elements in "GSE41769" and "GSE109657":
AASS
ADH1C
ALPK3
ANKRD37
BCL6
BCOR
BTG2
CADM2
CEP85L
CHMP1B
CTH
DCAF17
ERRFI1
FGF6
FHL2
GNG11
GPR45
HAS2
IL6R
KIAA1217
KLF9
LAMA4
LCE2D
LGR5
LRIF1
MAP3K2
MAPK1IP1L
MCAM
MSTN
MT1X
MZT2B
NCOA3
NETO2
NRP1
PECAM1
PIAS1
PPP1R3C
SGK1
SLC18B1
SLC25A33
SNORA16B
SNORD115-25
STK17A
TMEM14EP
TMEM70
TPM4
TUBB1
USP54
VEGFA
WBP1L
WEE1
ZFP36
ZXDA
